# Supplementary material for: A new method for synthesizing terminal olefins from esters using the Corey–Chaykovsky reagent
Source: Royal Society of Chemistry journal article supplement (doi:10.1039/d4ob00620h), 2024-01-01
Supplement: d4ob00620h1.pdf [file d4ob00620h1.pdf]

## Supplementary Information

### **A new method for synthesizing terminal olefins from esters using Corey-Chaykovsky's reagents**

Hucheng Shi,<sup>a</sup> Guoren Yue,<sup>a, b</sup> \* Penji Yan,<sup>b</sup> Xiangdong Ji,<sup>b</sup> Yangfei Wei,<sup>b</sup> Hai Song<sup>b</sup> and Xin Jia.<sup>a</sup>

a. School of Chemistry and Chemical Engineering, State Key Laboratory Incubation Base for Green Processing of Chemical Engineering, Shihezi University, Shihezi 832003, China.

b. Key Laboratory of Hexi Corridor Resources Utilization of Gansu Province, College of Chemistry and Chemical Engineering, Hexi University, Zhangye, Gansu 734000, PR China;

## Table of Contents

|                                                             |    |
|-------------------------------------------------------------|----|
| 1. General .....                                            | 3  |
| 2. Experimental Procedures .....                            | 3  |
| 3. Screening of Reaction Conditions <sup>a</sup> .....      | 5  |
| 4. HRMS .....                                               | 15 |
| 5. <sup>1</sup> H and <sup>13</sup> C NMR Spectrogram ..... | 17 |
| 6. Density Functional Theory Calculations.....              | 45 |
| 7. Cartesian Coordinates Calculated by DFT .....            | 46 |

## 1. General

The experiments were conducted under a nitrogen atmosphere. THF was treated by introducing sodium filaments and allowing them to stand overnight. Subsequently, benzophenone was introduced and the solution was refluxed until it exhibited a blue hue. The resulting fractions were gathered to obtain anhydrous THF.

NMR spectra were recorded on Bruker-400 MB instrument using  $\text{CDCl}_3$  as solvent and  $\text{Me}_4\text{Si}$  as internal standard at room temperature; the chemical shifts  $\delta$  were measured in ppm with respect to solvent ( $^1\text{H}$ :  $\text{CDCl}_3$ ,  $\delta = 7.28$  ppm;  $^{13}\text{C}\{^1\text{H}\}$ :  $\text{CDCl}_3$ ,  $\delta = 77.00$  ppm). Coupling constants (J) were in Hertz. The structures of compounds were ascertained with the aid of 1D NMR and 2D NMR spectroscopy. High resolution and accurate mass measurements were carried out using a Bruker micro TOF-QTM ESI-TOF (electrospray ionization/time of flight). Melting points (mp) were uncorrected and were measured on Hanon MP-100 automated melting point apparatus. Analytical thin layer chromatography (TLC) was performed on 0.25 mm silica gel 60 F254 plates; the revelation was viewed by UV lamp (254 nm). Column chromatography was performed by using 300–400 mesh silica gel (Qingdao Haiyang) and a mixture of petroleum ether/ethyl acetate or petroleum ether as an eluent.

Solvents and chemicals for all feedstocks are procured from Adamas-Beta, Aladdin, and Shao Yuan, and are utilized without additional purification unless specified otherwise.

## 2. Experimental Procedures

### 2.1 Synthesis of 2c<sup>1</sup>

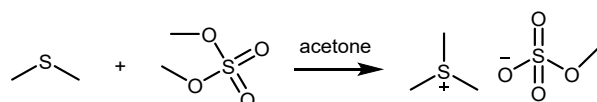

Experimental procedure: To dimethylsulfate (19 ml, 0.2 mol) in acetone (80 ml) was added dimethylsulfide (15 ml, 0.2 mol.). Stirring was sustained for 5 hours at 20–30°C. The acetone was removed under vacuum and the white solid was washed twice with acetone and dried under vacuum: 28 g of 2c (75% yield) was obtained.

### 2.2. General procedure for the synthesis of terminal olefins

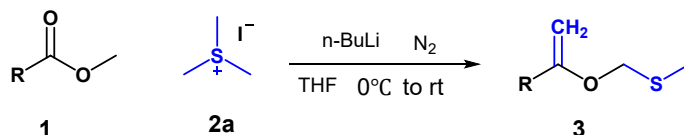

General reaction procedure: A solution of the sulfonium salt (2 mmol) in anhydrous THF (4 mL) was cooled to 0°C under nitrogen atmosphere. n-BuLi (1.6 M solution in Hexanes, 4 mmol) was added dropwise via syringe, and the reaction mixture allowed while stirring for 0.5 h. A solution of the esters (1 mmol) in anhydrous THF (1 mL) was added dropwise via syringe. The mixture was warmed to rt. After stirring an additional 1h the reaction was quenched with saturated aqueous

NH<sub>4</sub>Cl (5 mL) and then diluted with EA (10 mL). The organic layers were separated, the aqueous phase extracted with EA (3X10 mL), and the combined organic layers dried over anhydrous Na<sub>2</sub>SO<sub>4</sub>, filtered and concentrated. Flash chromatography (PE / EA as eluent) provided terminal olefin derivatives.

### 2.3 Derivatization reaction<sup>2</sup>

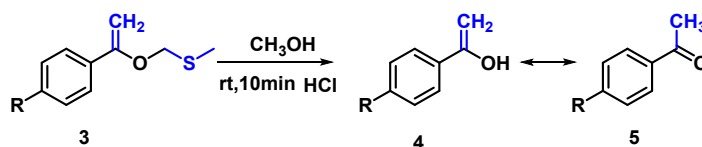

Experimental procedure: Alkenyl ether 3 (0.5 mmol) was dissolved in methanol, followed by the gradual addition of 0.5 ml of hydrochloric acid (1 M). After stirring an additional 10 minutes the reaction was quenched with saturated aqueous NaHCO<sub>3</sub> (5 mL) and then diluted with EA (10 mL). The organic layers were separated, the aqueous phase extracted with EA (3X10 mL), and the combined organic layers dried over anhydrous Na<sub>2</sub>SO<sub>4</sub>, filtered and concentrated. Flash chromatography (PE / EA as eluent) provided ketone derivatives.

### 3. Screening of Reaction Conditions <sup>a</sup>

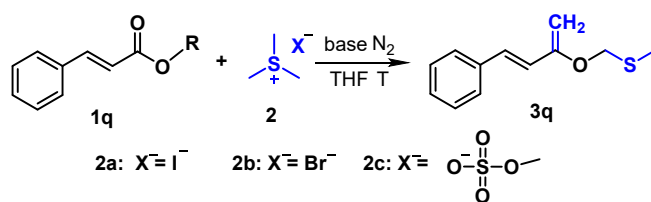

| Entry           | T(°C)      | reagents (equiv.) | base (equiv.)                      | Yield(%) <sup>b</sup> |
|-----------------|------------|-------------------|------------------------------------|-----------------------|
| 1               | -30        | 2a(2)             | n-BuLi(2)                          | --                    |
| 2               | -30        | 2a(2)             | n-BuLi(3)                          | 40                    |
| 3               | <b>-30</b> | 2a(2)             | <b>n-BuLi(4)</b>                   | <b>56</b>             |
| 4               | -30        | 2a(2)             | n-BuLi(5)                          | 44                    |
| 5               | -10        | 2a(2)             | n-BuLi(4)                          | 60                    |
| 6               | 0          | 2a(2)             | n-BuLi(4)                          | 71                    |
| 7               | rt         | 2a(2)             | <b>n-BuLi(4)</b>                   | <b>81</b>             |
| 8               | 60         | 2a(2)             | n-BuLi(4)                          | 14                    |
| 9 <sup>c</sup>  | rt         | 2a(2)             | NaH(4)                             | --                    |
| 10 <sup>c</sup> | rt         | 2a(2)             | t-BuOK(4)                          | --                    |
| 11 <sup>c</sup> | rt         | 2a(2)             | K <sub>2</sub> CO <sub>3</sub> (4) | --                    |
| 12              | rt         | 2b(2)             | n-BuLi(4)                          | 80                    |
| 13              | rt         | 2c(2)             | n-BuLi(4)                          | 88                    |

<sup>a</sup>General procedure: To a suspension of compound 2 in anhydrous THF was added the base under nitrogen atmosphere. After the mixture was stirred at certain temperature for 1 hour, 1q was added to the solution. After an additional hour, the reaction was quenched with saturated aqueous ammonium chloride. <sup>b</sup>Isolated yields. <sup>c</sup>Base and 2a were added at the same time.

### methyl(((1-phenylvinyl)oxy)methyl)sulfane

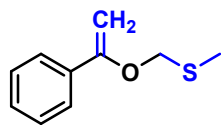

Compound **3a** was prepared from methyl benzoate (50 mg, 0.367 mmol, 1 eq) and trimethyl sulphur iodide (149.89 mg, 0.734 mmol, 2 eq) according to the general reaction procedure. Purification by flash column chromatography (1% ethyl acetate in petroleum ether) on a silica gel column afforded 47 mg (81% integrated yield), clear liquid,  $R_f = 0.5$  (silica gel, PE/EA = 100:1,v/v).  $^1\text{H}$  NMR (400 MHz, Chloroform-*d*)  $\delta$  7.74 – 7.63 (m, 2H), 7.42 – 7.32 (m, 3H), 5.08 (s, 2H), 4.86 (d,  $J = 3.1$  Hz, 1H), 4.33 (d,  $J = 3.1$  Hz, 1H), 2.33 (s, 3H).  $^{13}\text{C}$  NMR (101 MHz, Chloroform-*d*)  $\delta$  158.51, 136.13, 128.63, 128.17, 125.48, 85.03, 71.98, 15.08. HRMS(ESI)  $m/z$ :  $[\text{M} + \text{Na}]^+$  Calcd of  $\text{C}_{10}\text{H}_{12}\text{OSNa}$  203.0501, Found 203.0504. CAS RN:14439-02-2.

### methyl(((3-phenylprop-1-en-2-yl)oxy)methyl)sulfane

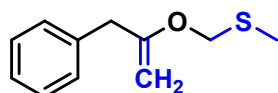

Compound **3b** was prepared from ethyl phenylacetate (50 mg, 0.337 mmol, 1 eq) and trimethyl sulphur iodide (137.89 mg, 0.675 mmol, 2 eq) according to the general reaction procedure. Purification by flash column chromatography (1% ethyl acetate in petroleum ether) on a silica gel column gave 46 mg (80% integrated yield), clear liquid,  $R_f = 0.5$  (silica gel, PE/EA = 100:1, v/v).  $^1\text{H}$  NMR (400 MHz, Chloroform-*d*)  $\delta$  7.35 – 7.21 (m, 5H), 4.85 (s, 2H), 4.12 (d,  $J = 2.4$  Hz, 1H), 4.06 (d,  $J = 2.4$  Hz, 1H), 3.46 (s, 2H), 2.10 (s, 3H).  $^{13}\text{C}$  NMR (101 MHz, Chloroform-*d*)  $\delta$  160.47, 138.26, 128.91, 128.25, 126.33, 85.15, 71.25, 41.46, 14.71. HRMS(ESI)  $m/z$ :  $[\text{M} + \text{Na}]^+$  Calcd of  $\text{C}_{11}\text{H}_{14}\text{OSNa}$  217.0657, Found 217.0657. New compound.

### methyl(((4-phenylbut-1-en-2-yl)oxy)methyl)sulfane

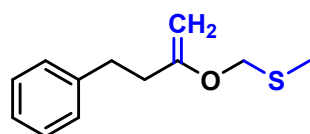

The compound **3c** was synthesized using 50 mg (0.304 mmol, 1 eq) of methyl phenylpropionate and 124.28 mg (0.609 mmol, 2 eq) of trimethyl sulphur iodide, following the standard reaction protocol. The purification process involved flash column chromatography (1% ethyl acetate in petroleum ether) on a silica gel column, resulting in the isolation of 45 mg of a clear liquid (81% integrated yield) with an  $R_f$  value of 0.5 (silica gel, PE/EA= 100:1, v/v).  $^1\text{H}$  NMR (400 MHz, Chloroform-*d*)  $\delta$  7.35 – 7.21 (m, 6H), 4.88 (s, 2H), 4.07 (d,  $J = 2.4$  Hz, 1H), 3.98 (d,  $J = 2.4$  Hz, 1H), 2.91 – 2.86 (m, 2H), 2.51 – 2.45 (m, 2H), 2.28 (s, 3H).  $^{13}\text{C}$  NMR (101 MHz, Chloroform-*d*)  $\delta$  160.99, 141.55, 128.41, 128.31, 125.91, 83.69, 71.22, 36.89, 33.77, 14.99. HRMS(ESI)  $m/z$ :  $[\text{M} + \text{Na}]^+$  Calcd of  $\text{C}_{12}\text{H}_{16}\text{OSNa}$  231.0814, Found 231.0816. New compound.

### (((1-(4-fluorophenyl)vinyl)oxy)methyl)(methyl)sulfane

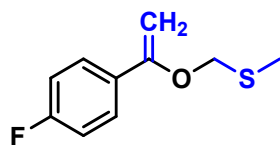

Compound **3d** was synthesized from 50 mg (0.324 mmol, 1 eq) of methyl 4-fluoro-benzoate and 132.39 mg (0.648 mmol, 2 eq) of trimethylsulphur iodide, following the standard reaction protocol. The purification was achieved through flash column chromatography (1% ethyl acetate in petroleum ether) on a silica gel column, resulting in the isolation of 42 mg of a clear liquid (77% integrated yield) with an  $R_f$  value of 0.5 (PE/EA = 100:1, v/v).  $^1\text{H NMR}$  (400 MHz, Chloroform-*d*)  $\delta$  7.68 – 7.55 (m, 2H), 7.05 (t,  $J$  = 8.7 Hz, 2H), 5.05 (s, 2H), 4.77 (d,  $J$  = 3.3 Hz, 1H), 4.30 (d,  $J$  = 3.3 Hz, 1H), 2.31 (s, 3H).  $^{13}\text{C NMR}$  (101 MHz, Chloroform-*d*)  $\delta$  164.28, 161.82, 157.67, 132.30, 132.27, 127.32, 127.24, 84.75, 84.74, 72.08, 15.09. HRMS(ESI)  $m/z$ : [M + Na] $^+$  Calcd of  $\text{C}_{10}\text{H}_{11}\text{FOSNa}$  : 221.0406, Found 221.0432. New compound.

### (((1-(4-chlorophenyl)vinyl)oxy)methyl)(methyl)sulfane

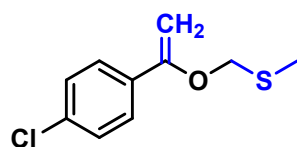

Compound **3e** was synthesized from 50 mg (0.293 mmol, 1 eq) of methyl 4-chloro-benzoate and 119.62 mg (0.586 mmol, 2 eq) of trimethylsulphur iodide, following the standard reaction procedure. Purification through flash column chromatography (1% ethyl acetate in petroleum ether) on a silica gel column yielded 54 mg of a clear liquid (90% combined yield) with an  $R_f$  value of 0.5 (silica gel, PE/EA= 100:1,v/v).  $^1\text{H NMR}$  (400 MHz, Chloroform-*d*)  $\delta$  7.65 – 7.51 (m, 2H), 7.38 – 7.28 (m, 2H), 5.05 (s, 2H), 4.82 (d,  $J$  = 3.3 Hz, 1H), 4.33 (d,  $J$  = 3.3 Hz, 1H), 2.31 (s, 3H).  $^{13}\text{C NMR}$  (101 MHz, Chloroform-*d*)  $\delta$  157.43, 134.58, 134.46, 128.34, 126.75, 85.35, 72.10, 15.11. HRMS(ESI)  $m/z$ : [M + Na] $^+$  Calcd of  $\text{C}_{10}\text{H}_{11}\text{ClOSNa}$  237.0111, Found 237.0120. CAS RN:14679-93-7.

### (((1-(4-bromophenyl)vinyl)oxy)methyl)(methyl)sulfane

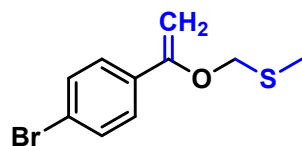

Compound **3f** was synthesized from 50 mg (0.232 mmol, 1 eq) of methyl 4-bromo-benzoate and 94.90 mg (0.465 mmol, 2 eq) of trimethylsulphur iodide, in accordance with the standard reaction protocol. Subsequent purification via flash column chromatography (1% ethyl acetate in petroleum ether) on a silica gel column yielded 34 mg of a clear liquid (66% combined yield) with an  $R_f$  value of 0.5 (silica gel, petroleum ether/ethyl acetate = 100:1).  $^1\text{H NMR}$  (400 MHz, Chloroform-*d*)  $\delta$  7.59 – 7.38 (m, 4H), 5.05 (s, 2H), 4.83 (d,  $J$  = 3.3 Hz, 1H), 4.33 (d,  $J$  = 3.3 Hz, 1H), 2.31 (s, 3H).  $^{13}\text{C NMR}$  (101 MHz, Chloroform-*d*)  $\delta$  157.49, 135.04, 131.30, 127.05, 122.70, 85.44, 72.11, 15.11. HRMS(ESI)  $m/z$ : [M + Na] $^+$  Calcd of

C<sub>10</sub>H<sub>11</sub>BrOSNa 280.9606, Found 280.9614. CAS RN:14680-04-7.

### methyl(((1-(4-(trifluoromethyl)phenyl)vinyl)oxy)methyl)sulfane

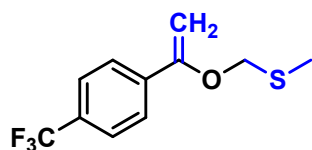

Compound **3g** was synthesized from 50 mg (0.225 mmol, 1 eq) of methyl 4-methylbenzoate and 99.96 mg (0.450 mmol, 2 eq) of trimethylsulphur iodide, in accordance with the standard reaction protocol. Subsequent purification via flash column chromatography (1% ethyl acetate in petroleum ether) on a silica gel column yielded 48 mg of a clear liquid (80% combined yield) with an R<sub>f</sub> value of 0.5 (silica gel, petroleum ether/ethyl acetate = 100:1). <sup>1</sup>H NMR (400 MHz, Chloroform-*d*) δ 7.76 (d, *J* = 8.2 Hz, 2H), 7.62 (d, *J* = 8.3 Hz, 2H), 5.08 (s, 2H), 4.93 (d, *J* = 3.4 Hz, 1H), 4.43 (d, *J* = 3.4 Hz, 1H), 2.32 (s, 3H). <sup>13</sup>C NMR (101 MHz, Chloroform-*d*) δ 157.10, 139.48, 139.47, 130.68, 130.36, 129.05, 125.86, 125.68, 125.45, 125.20, 125.16, 125.12, 125.08, 86.78, 72.22, 15.07. HRMS(ESI) *m/z*: [M + H]<sup>+</sup> Calcd of C<sub>11</sub>H<sub>12</sub>F<sub>3</sub>OS 249.0555, Found 249.0552. New compound.

### (((1-(2-fluorophenyl)vinyl)oxy)methyl)(methyl)sulfane

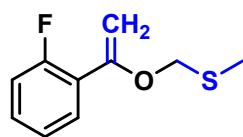

Compound **3h** was synthesized from 50 mg (0.324 mmol, 1 eq) of methyl 2-fluorobenzoate and 132.39 mg (0.648 mmol, 2 eq) of trimethylsulphur iodide, following the prescribed reaction protocol. Subsequent purification via flash column chromatography (1% ethyl acetate in petroleum ether) on a silica gel column yielded 40 mg of a clear liquid (72% combined yield) with an R<sub>f</sub> value of 0.5 (silica gel, PE/EA = 100:1, v/v). <sup>1</sup>H NMR (400 MHz, Chloroform-*d*) δ 7.60 (td, *J* = 7.7, 1.9 Hz, 1H), 7.35 – 7.27 (m, 1H), 7.27 – 7.03 (m, 2H), 5.04 (s, 2H), 4.92 – 4.86 (m, 1H), 4.57 (dd, *J* = 2.9, 1.3 Hz, 1H), 2.31 (s, 3H). <sup>13</sup>C NMR (101 MHz, Chloroform-*d*) δ 161.30, 158.80, 153.67, 153.64, 129.93, 129.84, 129.16, 129.13, 124.44, 124.32, 123.82, 123.79, 116.14, 115.91, 90.49, 90.41, 71.91, 14.98. HRMS(ESI) *m/z*: [M + Na]<sup>+</sup> Calcd of C<sub>11</sub>H<sub>11</sub>FOSNa 221.0406, Found 221.0432. New compound.

### methyl(((1-(*p*-tolyl)vinyl)oxy)methyl)sulfane

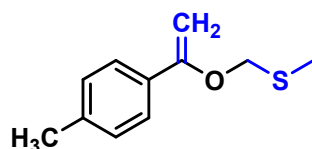

Compound **3i** was synthesized from 50 mg (0.333 mmol, 1 eq) of methyl 4-methylbenzoate and 135.89 mg (0.666 mmol, 2 eq) of trimethylsulphur iodide according to the standard reaction protocol. Subsequent purification through flash column chromatography (1% ethyl acetate in petroleum ether)



on a silica gel column yielded 22 mg of a clear liquid (44% integrated yield) with an R<sub>f</sub> value of 0.5 (silica gel, PE/EA = 100:1 v/v). <sup>1</sup>H NMR (400 MHz, Chloroform-*d*) δ 7.55 (d, *J* = 7.9 Hz, 2H), 7.18 (d, *J* = 7.9 Hz, 2H), 5.06 (s, 2H), 4.80 (d, *J* = 3.0 Hz, 1H), 4.28 (d, *J* = 3.0 Hz, 1H), 2.39 (s, 3H), 2.32 (s, 3H). <sup>13</sup>C NMR (101 MHz, Chloroform-*d*) δ 158.64, 138.49, 133.36, 128.84, 125.39, 84.31, 71.91, 21.16, 15.02. HRMS(ESI) *m/z*: [M + Na]<sup>+</sup> Calcd of C<sub>11</sub>H<sub>14</sub>OSNa 217.0657, Found 217.0676. New compound.

**(((1-(4-(tert-butyl)phenyl)vinyl)oxy)methyl)(methyl)sulfane**

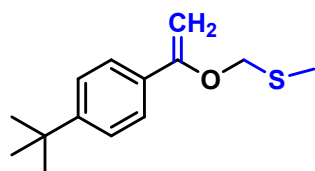

Compound **3j** was derived from 100 mg (0.52 mmol, 1 eq) of methyl 4-tert-butylbenzoate and 212.29 mg (1.04 mmol, 2 eq) of trimethyl iodide under the conditions of the standard reaction protocol at 40 °C. Subsequent purification by means of flash column chromatography (1% ethyl acetate in petroleum ether) on a silica gel column yielded 60 mg of a yellow oily liquid (80% combined yield) with an R<sub>f</sub> value of 0.5 (silica gel, PE/EA = 100:1 v/v). <sup>1</sup>H NMR (400 MHz, Chloroform-*d*) δ 7.58 (d, *J* = 8.5 Hz, 2H), 7.39 (d, *J* = 8.5 Hz, 2H), 5.06 (s, 2H), 4.80 (d, *J* = 3.0 Hz, 1H), 4.28 (d, *J* = 3.0 Hz, 1H), 2.31 (s, 3H), 1.35 (s, 9H). <sup>13</sup>C NMR (101 MHz, Chloroform-*d*) δ 158.50, 151.75, 133.29, 125.19, 125.09, 84.40, 71.85, 34.60, 31.27, 15.04. HRMS(ESI) *m/z*: [M + Na]<sup>+</sup> Calcd of C<sub>14</sub>H<sub>20</sub>OSNa 259.1127, Found 259.1128. New compound.

**(((1-(4-methoxyphenyl)vinyl)oxy)methyl)(methyl)sulfane**

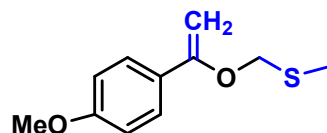

Compound **3k** was synthesized from 100 mg (0.61 mmol, 1 eq) of methyl 4-methoxybenzoate and 245.61 mg (1.2 mmol, 2 eq) of trimethyl iodide at 40 °C in accordance with the standard reaction procedure. Subsequent purification through flash column chromatography (1% ethyl acetate in petroleum ether) on a silica gel column yielded 61 mg of a yellow oily liquid (58% combined yield) with an R<sub>f</sub> value of 0.5 (silica gel, PE/EA = 50:1 v/v). <sup>1</sup>H NMR (400 MHz, Chloroform-*d*) δ 7.62 – 7.55 (m, 2H), 6.89 (d, *J* = 8.9 Hz, 2H), 5.05 (s, 2H), 4.73 (d, *J* = 3.1 Hz, 1H), 4.22 (d, *J* = 3.1 Hz, 1H), 3.84 (s, 3H), 2.31 (s, 3H). <sup>13</sup>C NMR (101 MHz, Chloroform-*d*) δ 160.00, 158.31, 128.76, 126.79, 113.51, 83.44, 71.87, 55.30, 15.10. HRMS(ESI) *m/z*: [M + Na]<sup>+</sup> Calcd of C<sub>11</sub>H<sub>14</sub>O<sub>2</sub>SNa 233.0606, Found 233.0615. New compound.

**(((1-([1,1'-biphenyl]-4-yl)vinyl)oxy)methyl)(methyl)sulfane**

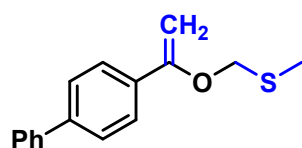

Compound **3l** was synthesized from 80 mg (0.376 mmol, 1 eq) of methyl 4-phenylcarboxylate and 154 mg (0.752 mmol, 2 eq) of trimethyl iodide following the general reaction procedure. Subsequent purification via flash column chromatography (1% ethyl acetate in petroleum ether) on a silica gel column yielded 46 mg of a white solid with a melting point of 108.6 °C (57% integrated yield) and an R<sub>f</sub> value of 0.5 (silica gel, p PE/EA = 50:1,v/v). <sup>1</sup>H NMR (400 MHz, Chloroform-*d*) δ 7.77 – 7.74 (m, 2H), 7.66 – 7.61 (m, 4H), 7.50 (td, *J* = 7.8, 4.9 Hz, 3H), 5.11 (s, 2H), 4.92 (d, *J* = 3.2 Hz, 1H), 4.37 (d, *J* = 3.2 Hz, 1H), 2.35 (s, 3H). <sup>13</sup>C NMR (101 MHz, Chloroform-*d*) δ 158.17, 141.42, 140.64, 135.05, 128.83, 127.47, 127.06, 126.91, 125.89, 85.09, 72.03, 15.14. HRMS(ESI) *m/z*: [M + Na]<sup>+</sup> Calcd of C<sub>16</sub>H<sub>16</sub>NOSNa 279.0921, Found 279.0930. CAS RN:14679-94-8.

#### **N, N-dimethyl-4-(1-((methylthio)methoxy)vinyl)aniline**

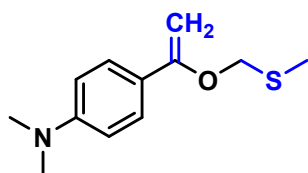

Compound **2m** was derived from 100 mg (0.558 mmol, 1 eq) of methyl *p*-dimethylaminobenzoate and 227.7 mg (1.116 mmol, 2 eq) of trimethyl iodide at 45 °C, in accordance with the general reaction protocol. Following purification through flash column chromatography (1% ethyl acetate in petroleum ether) on a silica gel column, a yield of 32 mg (35% combined yield) of yellow oily liquid with an R<sub>f</sub> value of 0.2 (silica gel, petroleum ether:ethyl acetate = 40:1) was obtained. <sup>1</sup>H NMR (400 MHz, Chloroform-*d*) δ 7.56 – 7.51 (m, 2H), 6.72 – 6.69 (m, 2H), 5.05 (s, 2H), 4.68 (d, *J* = 2.9 Hz, 1H), 4.16 (d, *J* = 2.9 Hz, 1H), 3.00 (s, 6H), 2.31 (s, 3H). <sup>13</sup>C NMR (101 MHz, Chloroform-*d*) δ 158.92, 150.78, 126.41, 124.18, 111.77, 81.94, 71.73, 40.42, 15.05. HRMS(ESI) *m/z*: [M + Na]<sup>+</sup> Calcd of C<sub>12</sub>H<sub>17</sub>NOSNa 246.0923, Found 246.0950. New compound.

#### **methyl(((1-(naphthalen-2-yl)vinyl)oxy)methyl)sulfane<sup>2</sup>**

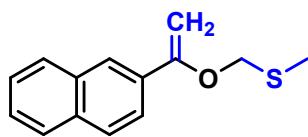

Compound **3n** was synthesized from 50 mg (0.217 mmol, 1 eq) of methyl 1-naphthalenecarboxylate and 102.06 mg (0.537 mmol, 2 eq) of trimethylsulphur iodide in accordance with the general reaction protocol. The purification process involved flash column chromatography (1% ethyl acetate in petroleum ether) on a silica gel column, resulting in a yield of 36 mg (66% combined yield) of a clear liquid with an R<sub>f</sub> value of 0.5 (silica gel, petroleum ether/ethyl acetate = 100:1). <sup>1</sup>H NMR (400 MHz, Chloroform-*d*) δ 8.35 – 8.10 (m, 1H), 7.96 – 7.84 (m, 2H), 7.63 – 7.45 (m, 4H), 5.11 (s, 2H), 4.70 (d, *J* = 2.4 Hz, 1H), 4.65 (d, *J* = 2.4 Hz, 1H), 2.35 (s, 3H). <sup>13</sup>C NMR (101 MHz, Chloroform-*d*) δ 159.25, 135.06, 133.64, 131.35, 129.15, 128.24, 127.09, 126.27, 125.89, 125.75, 125.14, 90.57, 72.08, 15.25. HRMS (ESI) *m/z*: [M + Na]<sup>+</sup> Calcd of C<sub>14</sub>H<sub>14</sub>OSNa 253.0657, Found 253.0660. CAS RN:14679-95-9.

#### **(((1-(cyclohex-1-en-1-yl)vinyl)oxy)methyl)(methyl)sulfane**

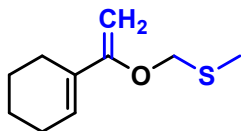

Compound **3o** was synthesized from 100 mg (0.731 mmol, 1 eq) of methyl cyclohex-1-ene-1-carboxylate and 291 mg (2.43 mmol, 2 eq) of trimethyl iodide following the general reaction protocol. Subsequent purification via flash column chromatography (in pure petroleum ether) on a silica gel column yielded 62.8 mg (57.7% combined yield) of a clear oily liquid with an R<sub>f</sub> value of 0.5 (silica gel, petroleum ether). <sup>1</sup>H NMR (400 MHz, Chloroform-*d*) δ 6.35 (td, *J* = 3.8, 1.8 Hz, 1H), 4.34 (d, *J* = 2.8 Hz, 1H), 4.08 (d, *J* = 2.8 Hz, 1H), 2.27 (s, 3H), 2.17 (tdd, *J* = 6.7, 4.3, 2.1 Hz, 4H), 1.69 (qd, *J* = 6.3, 2.5 Hz, 2H), 1.61 (tq, *J* = 5.4, 3.2, 2.3 Hz, 2H). <sup>13</sup>C NMR (101 MHz, Chloroform-*d*) δ 159.09, 131.65, 125.41, 83.35, 71.46, 25.38, 25.09, 22.67, 22.06, 15.11. HRMS(ESI) *m/z*: [M + Na]<sup>+</sup> Calcd of C<sub>10</sub>H<sub>16</sub>OSNa 207.0814, Found 207.0821. New compound.

### 2-(1-((methylthio)methoxy)vinyl)furan

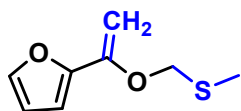

Compound **3p** was synthesized from 50 mg (0.396 mmol, 1 eq) of methyl furan-2-carboxylate and 161.82 mg (0.792 mmol, 2 eq) of trimethylsulphur iodide following the standard reaction protocol. The subsequent purification via flash column chromatography (1% ethyl acetate in petroleum ether) on a silica gel column yielded 40 mg of a clear liquid (69% combined yield) with an R<sub>f</sub> value of 0.5 (silica gel, PE/EA = 100:1 v/v). <sup>1</sup>H NMR (400 MHz, Chloroform-*d*) δ 7.39 (dd, *J* = 1.9, 0.9 Hz, 1H), 6.53 (dd, *J* = 3.4, 0.9 Hz, 1H), 6.41 (dd, *J* = 3.3, 1.8 Hz, 1H), 5.04 (s, 2H), 4.91 (d, *J* = 3.1 Hz, 1H), 4.32 (d, *J* = 3.0 Hz, 1H), 2.29 (s, 3H). <sup>13</sup>C NMR (101 MHz, Chloroform-*d*) δ 150.54, 150.19, 142.37, 111.06, 106.83, 84.35, 71.95, 14.96. HRMS(ESI) *m/z*: [M + Na]<sup>+</sup> Calcd of C<sub>8</sub>H<sub>10</sub>O<sub>2</sub>SNa 193.0193, Found 193.0201. New compound.

### 2-(1-((methylthio)methoxy)vinyl)thiophene

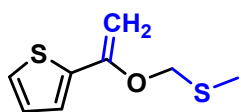

Compound **3q** was synthesized from 50 mg (0.351 mmol, 1 eq) of methyl thiophene-2-carboxylate and 134.54 mg (0.702 mmol, 2 eq) of trimethylsulphur iodide following the standard reaction protocol. The subsequent purification via flash column chromatography (1% ethyl acetate in petroleum ether) on a silica gel column yielded 37 mg of a clear liquid (66% integrated yield) with an R<sub>f</sub> value of 0.5 (silica gel, PE/EA = 100:1 v/v). <sup>1</sup>H NMR (400 MHz, Chloroform-*d*) δ 7.33 – 7.22 (m, 2H), 7.01 (dd, *J* = 5.1, 3.6 Hz, 1H), 5.06 (s, 2H), 4.82 (d, *J* = 3.4 Hz, 1H), 4.27 (d, *J* = 3.3 Hz, 1H). <sup>13</sup>C NMR (101 MHz, Chloroform-*d*) δ 153.59, 140.08, 127.17, 125.21, 124.06, 84.41, 72.04, 15.01. HRMS(ESI) *m/z*: [M + Na]<sup>+</sup> Calcd of C<sub>8</sub>H<sub>10</sub>OS<sub>2</sub>Na 209.0065, Found 209.0082. New compound.

### 2-(1-((methylthio)methoxy)vinyl)pyridine

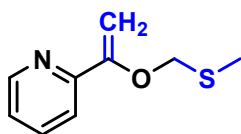

Compound **3r** was synthesized from 50 mg (0.364 mmol, 1 eq) of methyl 2-pyridinecarboxylate and 148 mg (0.728 mmol, 2 eq) of trimethyl iodide following the general reaction protocol. Subsequent purification via flash column chromatography (1% ethyl acetate in petroleum ether) on a silica gel column furnished 42 mg (71% combined yield) of a yellow-green liquid with an  $R_f$  value of 0.5 (silica gel, PE/EA = 5:1 v/v).  $^1\text{H}$  NMR (400 MHz, Chloroform- $d$ )  $\delta$  8.59 (dt,  $J$  = 4.9, 1.4 Hz, 1H), 7.70 (dd,  $J$  = 3.7, 1.4 Hz, 2H), 7.23 (td,  $J$  = 5.0, 3.2 Hz, 1H), 5.59 (d,  $J$  = 2.6 Hz, 1H), 5.11 (s, 2H), 4.48 (d,  $J$  = 2.5 Hz, 1H), 2.31 (s, 3H).  $^{13}\text{C}$  NMR (101 MHz, Chloroform- $d$ )  $\delta$  157.13, 153.12, 149.04, 136.50, 123.24, 119.24, 87.52, 72.21, 15.12. HRMS(ESI)  $m/z$ : $[\text{M} + \text{Na}]^+$  Calcd of  $\text{C}_9\text{H}_{10}\text{NOSNa}$  203.0375, Found 203.0513. New compound.

#### methyl(((3-methyl-3-phenylbut-1-en-2-yl)oxy)methyl)sulfane

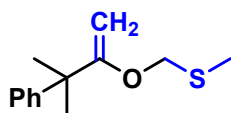

Compound **3s** was synthesized from 100 mg (0.561 mmol, 1 eq) of methyl 2-methyl-2-phenylpropionate and 229 mg (1.12 mmol, 2 eq) of trimethyl iodide following the general reaction protocol. Purification through flash column chromatography (in pure petroleum ether) on a silica gel column yielded 38.6 mg (41.1% combined yield) of a clear oily liquid with an  $R_f$  value of 0.5 (silica gel, PE/EA = 50:1 v/v).  $^1\text{H}$  NMR (400 MHz, Chloroform- $d$ )  $\delta$  7.43 – 7.38 (m, 2H), 7.31 (dd,  $J$  = 8.5, 6.9 Hz, 2H), 7.23 – 7.18 (m, 1H), 4.82 (s, 2H), 4.41 (d,  $J$  = 2.9 Hz, 1H), 4.13 (d,  $J$  = 3.0 Hz, 1H), 1.93 (s, 3H), 1.52 (s, 6H).  $^{13}\text{C}$  NMR (101 MHz, Chloroform- $d$ )  $\delta$  167.12, 147.58, 127.95, 126.00, 125.81, 82.76, 70.94, 43.77, 27.91, 14.52. HRMS(ESI)  $m/z$ : $[\text{M} + \text{Na}]^+$  Calcd of  $\text{C}_{13}\text{H}_{18}\text{OSNa}$  254.0970, Found 254.0996. New compound.

#### methyl((non-1-en-2-yloxy)methyl)sulfane

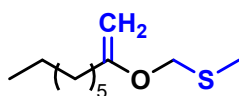

Compound **3t** was synthesized from 100 mg (0.437 mmol, 1 eq) of methyl methyl octanoate and 178 mg (0.875 mmol, 2 eq) of trimethyl iodide following the general reaction protocol. Subsequent purification through flash column chromatography (in pure petroleum ether) on a silica gel column yielded 77.1 mg (60.2% overall yield) of a clear oily liquid with an  $R_f$  value of 0.5 (silica gel, petroleum ether).  $^1\text{H}$  NMR (400 MHz, Chloroform- $d$ )  $\delta$  4.83 (s, 2H), 4.02 (d,  $J$  = 2.3 Hz, 1H), 3.90 (d,  $J$  = 2.3 Hz, 1H), 2.23 (s, 3H), 2.15 – 2.09 (m, 2H), 1.51 (t,  $J$  = 7.5 Hz, 2H), 1.29 (d,  $J$  = 5.1 Hz, 8H), 0.90 (d,  $J$  = 6.5 Hz, 3H).  $^{13}\text{C}$  NMR (101 MHz, Chloroform- $d$ )  $\delta$  161.95, 82.88, 70.99, 34.99, 31.92, 29.65, 29.36, 27.30, 22.68, 14.89, 14.09. HRMS(ESI)  $m/z$ : $[\text{M} + \text{Na}]^+$  Calcd of  $\text{C}_{11}\text{H}_{22}\text{OSNa}$  225.1283, Found 225.1301. New compound.

### Methyl(((nona-1,3-dien-2-yloxy)methyl)sulfane

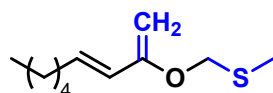

Compound **3u** was prepared from methyl methyl octenoate (100 mg, 0.441 mmol, 1 eq) and trimethyl iodide (180.31 mg, 0.882 mmol, 2 eq) according to the general reaction procedure. Purification by flash column chromatography (pure petroleum ether) on a silica gel column afforded 60.2 g (47% overall yield), clear oily liquid,  $R_f=0.5$  (silica gel, petroleum ether).  $^1\text{H}$  NMR (400 MHz, Chloroform-*d*)  $\delta$  6.13 (dt,  $J = 15.6, 7.0$  Hz, 1H), 5.87 (dt,  $J = 15.5, 1.5$  Hz, 1H), 4.94 (s, 2H), 4.20 (d,  $J = 2.3$  Hz, 1H), 4.11 (d,  $J = 2.3$  Hz, 1H), 2.27 (s, 3H), 2.11 (qd,  $J = 7.1, 1.4$  Hz, 2H), 1.35 – 1.28 (m, 6H), 0.91 (d,  $J = 1.9$  Hz, 3H).  $^{13}\text{C}$  NMR (101 MHz, Chloroform-*d*)  $\delta$  157.00, 131.94, 125.82, 86.93, 71.39, 32.28, 31.44, 28.72, 22.51, 15.03, 14.01. HRMS(ESI)  $m/z$ :  $[\text{M} + \text{Na}]^+$  Calcd of  $\text{C}_{14}\text{H}_{14}\text{OSNa}$  223.1127, Found 253.0660. New compound.

### (E)-methyl(((4-phenylbuta-1,3-dien-2-yl)oxy)methyl)sulfane

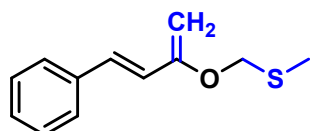

Compound **3v** was synthesized from 50 mg (0.283 mmol, 1 eq) of ethyl cinnamate and 115.81 mg (0.566 mmol, 2 eq) of trimethyl iodide following the standard reaction protocol. Purification via flash column chromatography (using 1% ethyl acetate in petroleum ether) on a silica gel column yielded 42 mg (81% combined yield) of a yellow-green liquid with an  $R_f$  value of 0.5 (silica gel, PE/EA = 50:1 v/v).  $^1\text{H}$  NMR (400 MHz, Chloroform-*d*)  $\delta$  7.50 – 7.43 (m, 2H), 7.36 (t,  $J = 7.6$  Hz, 2H), 7.28 (s, 1H), 7.01 (d,  $J = 15.9$  Hz, 1H), 6.59 (d,  $J = 15.9$  Hz, 1H), 5.04 (s, 2H), 4.47 (d,  $J = 2.5$  Hz, 1H), 4.35 (d,  $J = 2.5$  Hz, 1H), 2.33 (s, 3H).  $^{13}\text{C}$  NMR (101 MHz, Chloroform-*d*)  $\delta$  156.88, 136.67, 129.01, 128.63, 127.86, 126.77, 124.56, 90.00, 71.66, 15.14. (DEPT-135)  $^{13}\text{C}$  NMR (101 MHz, Chloroform-*d*)  $\delta$  129.00, 128.64, 127.87, 126.78, 124.55. HRMS(ESI)  $m/z$ :  $[\text{M} + \text{Na}]^+$  Calcd of  $\text{C}_{12}\text{H}_{14}\text{OSNa}$  229.0657, Found 229.0668. New compound.

### (E)-methyl(((4-(p-tolyl)buta-1,3-dien-2-yl)oxy)methyl)sulfane

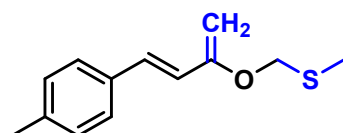

Compound **3w** was synthesized from 50 mg (0.262 mmol, 1 eq) of ethyl 4-methylcinnamate and 107.27 mg (0.524 mmol, 2 eq) of trimethyl iodide following the standard reaction procedure. The subsequent purification through flash column chromatography (employing 1% ethyl acetate in petroleum ether) on a silica gel column resulted in the isolation of 35 mg (70% combined yield) of a yellow-green liquid with an  $R_f$  value of 0.5 (silica gel, PE/EA = 50:1 v/v).  $^1\text{H}$  NMR (400 MHz, Chloroform-*d*)  $\delta$  7.40 – 7.34 (m, 2H), 7.17 (d,  $J = 7.9$  Hz, 2H), 6.99 (d,  $J = 15.9$  Hz, 1H), 6.54 (d,  $J = 15.9$  Hz, 1H), 5.03 (s, 2H), 4.44 (d,  $J = 2.4$  Hz, 1H), 4.33 (d,  $J = 2.4$  Hz, 1H), 2.38 (s, 3H), 2.33 (s, 3H).  $^{13}\text{C}$  NMR (101 MHz, Chloroform-*d*)  $\delta$  157.11,

137.75, 133.92, 129.35, 128.98, 126.70, 123.61, 89.48, 71.68, 21.23, 15.09. HRMS(ESI)  $m/z$ :  $[M + Na]^+$   
Calcd of  $C_{13}H_{16}OSNa$  243.0814, Found 243.0818. New compound.

**(E)-(((4-(4-chlorophenyl)buta-1,3-dien-2-yl)oxy)methyl)(methyl)sulfane**

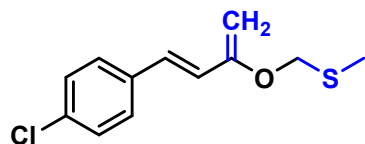

Compound 3x was synthesized from 50 mg (0.262 mmol, 1 eq) of ethyl 4-chlorocinnamate and 107.27 mg (0.524 mmol, 2 eq) of trimethyl iodide following the established reaction protocol. The subsequent purification through flash column chromatography (using 1% ethyl acetate in petroleum ether) on a silica gel column resulted in the isolation of 46 mg (80% combined yield) of a yellow-green liquid with an  $R_f$  value of 0.5 (silica gel, PE/EA = 50:1 v/v).  $^1H$  NMR (400 MHz, Chloroform-*d*)  $\delta$  7.43 – 7.26 (m, 4H), 6.94 (d,  $J$  = 15.9 Hz, 1H), 6.53 (d,  $J$  = 15.9 Hz, 1H), 5.02 (s, 2H), 4.46 (d,  $J$  = 2.5 Hz, 1H), 4.36 (d,  $J$  = 2.5 Hz, 1H), 2.32 (s, 3H).  $^{13}C$  NMR (101 MHz, Chloroform-*d*)  $\delta$  156.68, 135.22, 133.47, 128.79, 127.90, 127.73, 125.17, 90.43, 71.76, 15.11. HRMS(ESI)  $m/z$ :  $[M + Na]^+$  Calcd of  $C_{12}H_{13}ClOSNa$  263.0627, Found 253.0660. New compound.

**(E)-2-(3-((methylthio)methoxy)buta-1,3-dien-1-yl)-3-phenyloxirane**

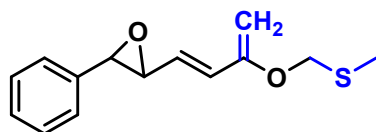

Compound 3y was synthesized from 50 mg (0.229 mmol, 1 eq) of methyl 2-pyridinecarboxylate and 93 mg (0.458 mmol, 2 eq) of trimethyl iodide following the established reaction protocol. The subsequent purification through flash column chromatography (using 1% ethyl acetate in petroleum ether) on a silica gel column resulted in the isolation of 32 mg (66% combined yield) of a yellow-green liquid with an  $R_f$  value of 0.5 (silica gel, PE/EA = 50:1 v/v).  $^1H$  NMR (400 MHz, Chloroform-*d*)  $\delta$  7.43 – 7.25 (m, 6H), 6.29 (d,  $J$  = 15.5 Hz, 1H), 6.04 (d,  $J$  = 7.5 Hz, 1H), 4.97 (s, 2H), 4.37 (d,  $J$  = 2.6 Hz, 1H), 4.30 (d,  $J$  = 2.5 Hz, 1H), 3.84 (d,  $J$  = 1.9 Hz, 1H), 3.43 (dd,  $J$  = 7.5, 2.0 Hz, 1H), 2.29 (s, 3H).  $^{13}C$  NMR (101 MHz, Chloroform-*d*)  $\delta$  155.74, 136.99, 130.03, 128.52, 128.25, 128.10, 126.97, 125.45, 90.16, 71.64, 62.22, 60.82, 15.09.  $^{13}C$  NMR(DEPT-135)(101 MHz, Chloroform-*d*)  $\delta$  130.06, 128.54, 128.27, 128.12, 126.96, 126.50, 125.46, 62.27, 60.82. HRMS(ESI)  $m/z$ :  $[M + Na]^+$  Calcd of  $C_{14}H_{16}NO_2SNa$  271.0871, Found 271.0868. New compound.

**1-([1,1'-biphenyl]-4-yl)ethan-1-one<sup>4</sup>**

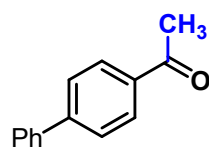

Compound **5l** was synthesized from 150 mg (0.58 mmol) of **3l** using the established reaction protocol. Following purification via flash column chromatography on a silica gel column (PE/EA=40:1 v/v), 115 mg (98% overall yield) of a white solid with an R<sub>f</sub> value of 0.5 and a melting point of 194–198 °C was isolated. <sup>1</sup>H NMR (400 MHz, Chloroform-*d*) δ 8.09 – 8.04 (m, 2H), 7.73 – 7.64 (m, 4H), 7.53 – 7.41 (m, 3H), 2.67 (s, 3H). <sup>13</sup>C NMR (101 MHz, Chloroform-*d*) δ 197.70, 145.79, 139.90, 135.90, 128.96, 128.92, 128.24, 127.28, 127.23, 26.64. White crystal, mp 194–198 °C. CAS RN: 92-91-1.

#### 1-(4-chlorophenyl)ethan-1-one<sup>5</sup>

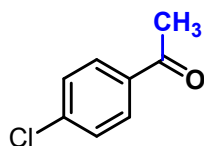

Compound **5e** was synthesized from 100 mg (0.58 mmol) of **3e** using the established reaction protocol. Following purification via flash column chromatography on a silica gel column (PE/EA=40:1 v/v), 70.5 mg (98% overall yield) of transparent liquid with an R<sub>f</sub> value of 0.5. <sup>1</sup>H NMR (400 MHz, Chloroform-*d*) δ 7.90 – 7.88 (m, 2H), 7.44 – 7.41 (m, 2H), 2.58 (s, 3H). <sup>13</sup>C NMR (101 MHz, Chloroform-*d*) δ 196.73, 139.53, 135.45, 129.71, 128.86, 26.49. CAS RN: 92-91-1.

#### 4.HRMS

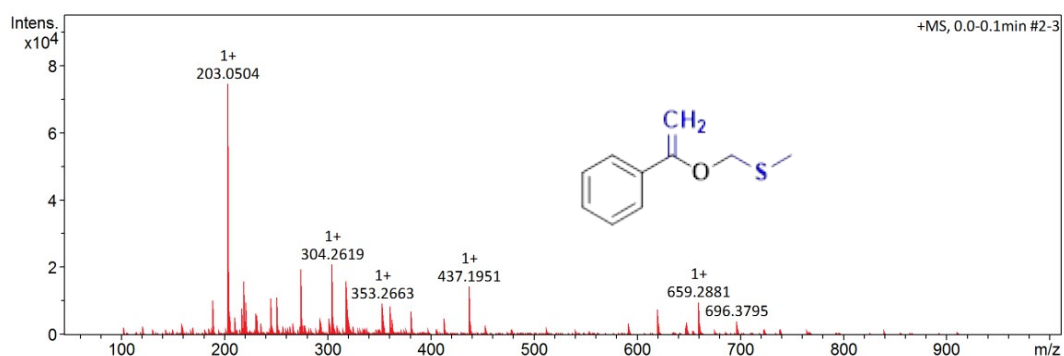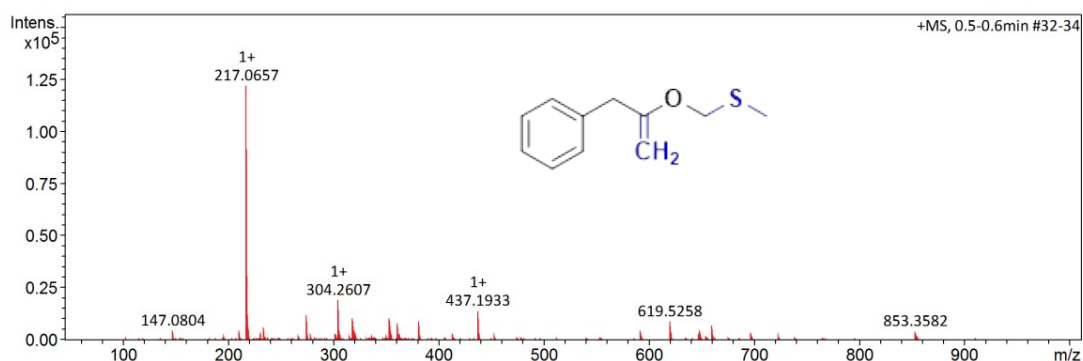

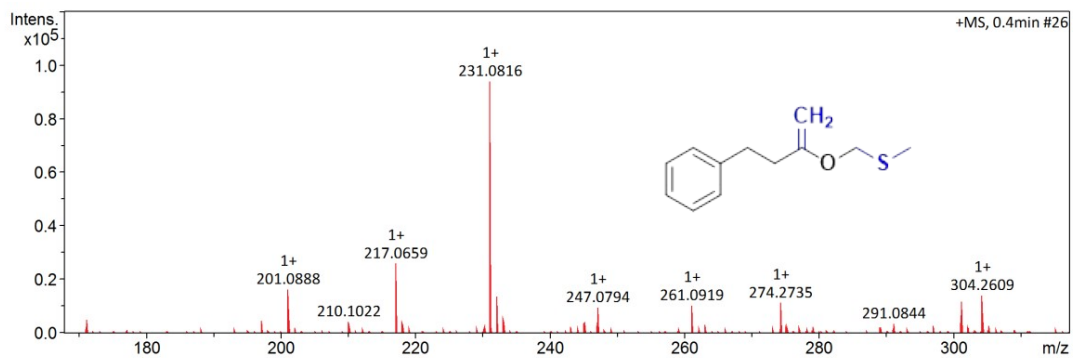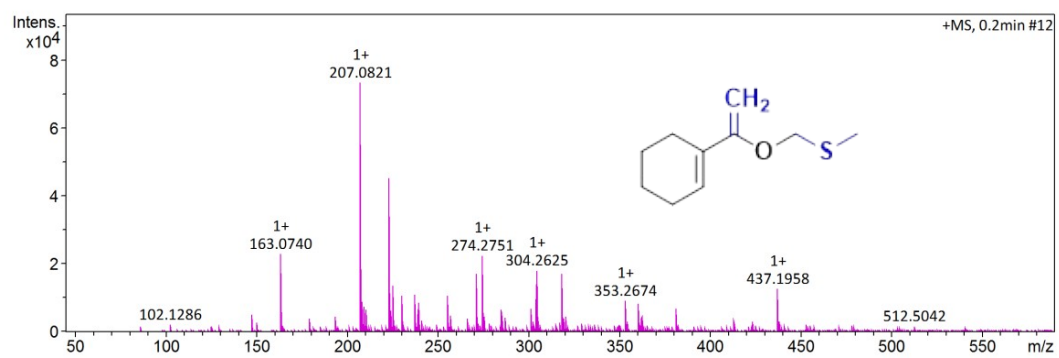



### 5. <sup>1</sup>H and <sup>13</sup>C NMR Spectrogram

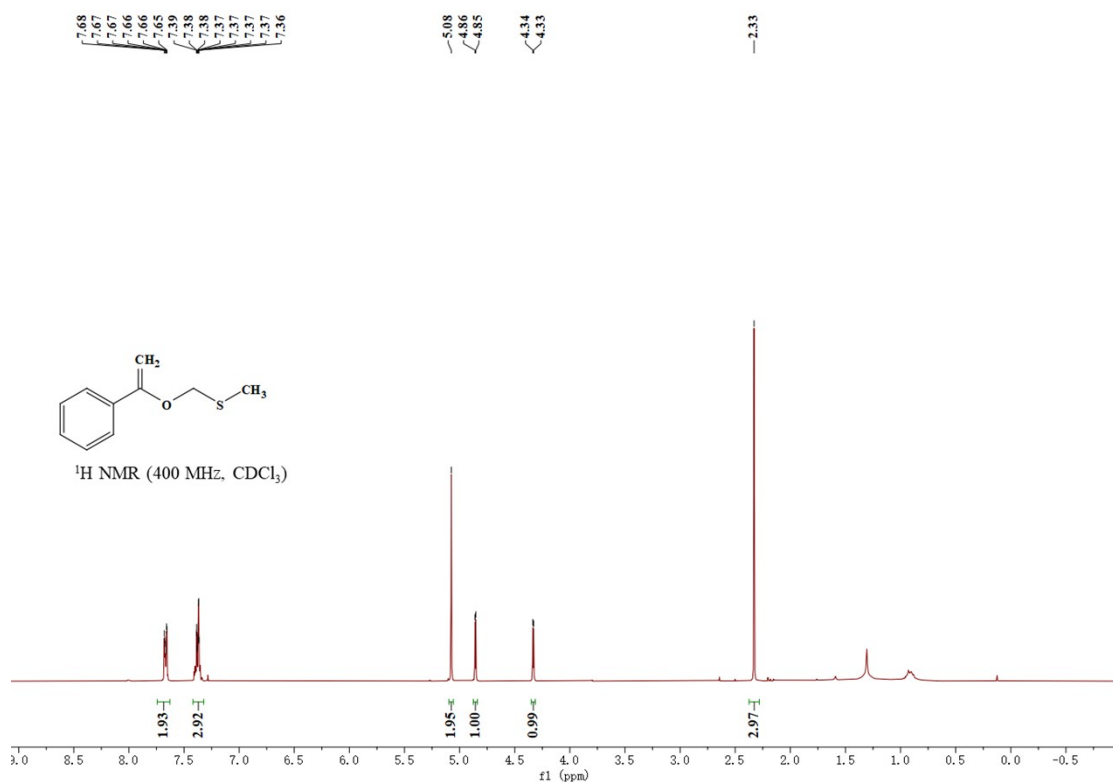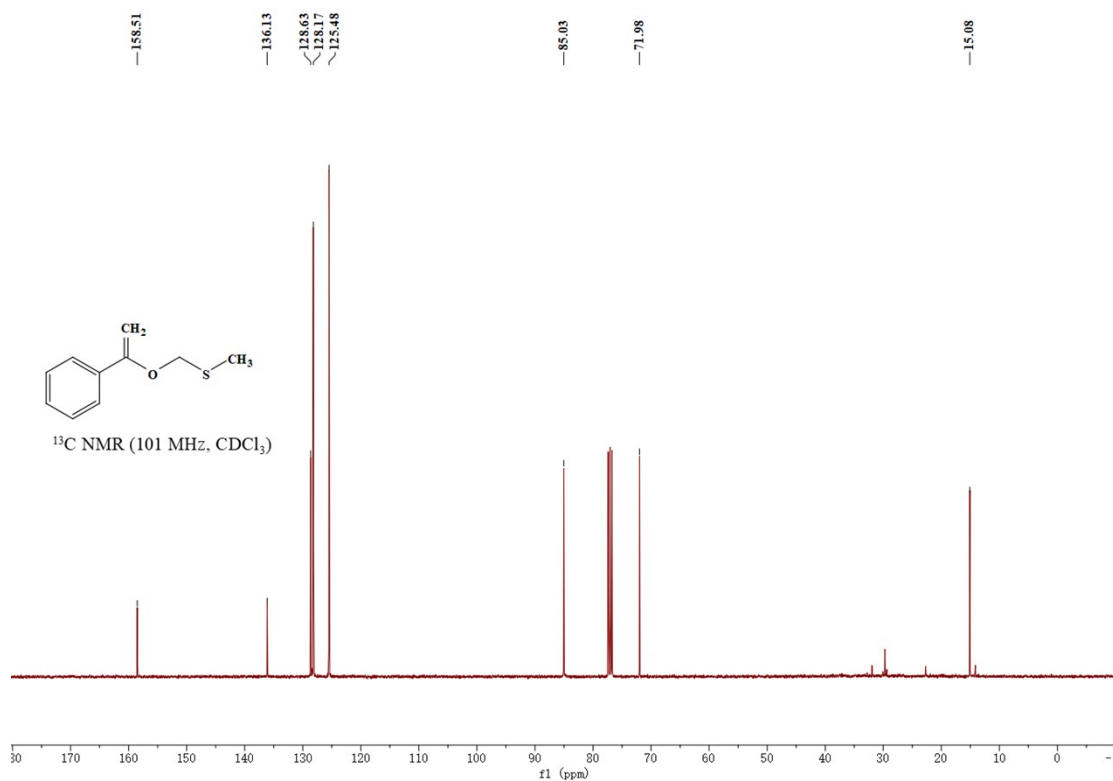

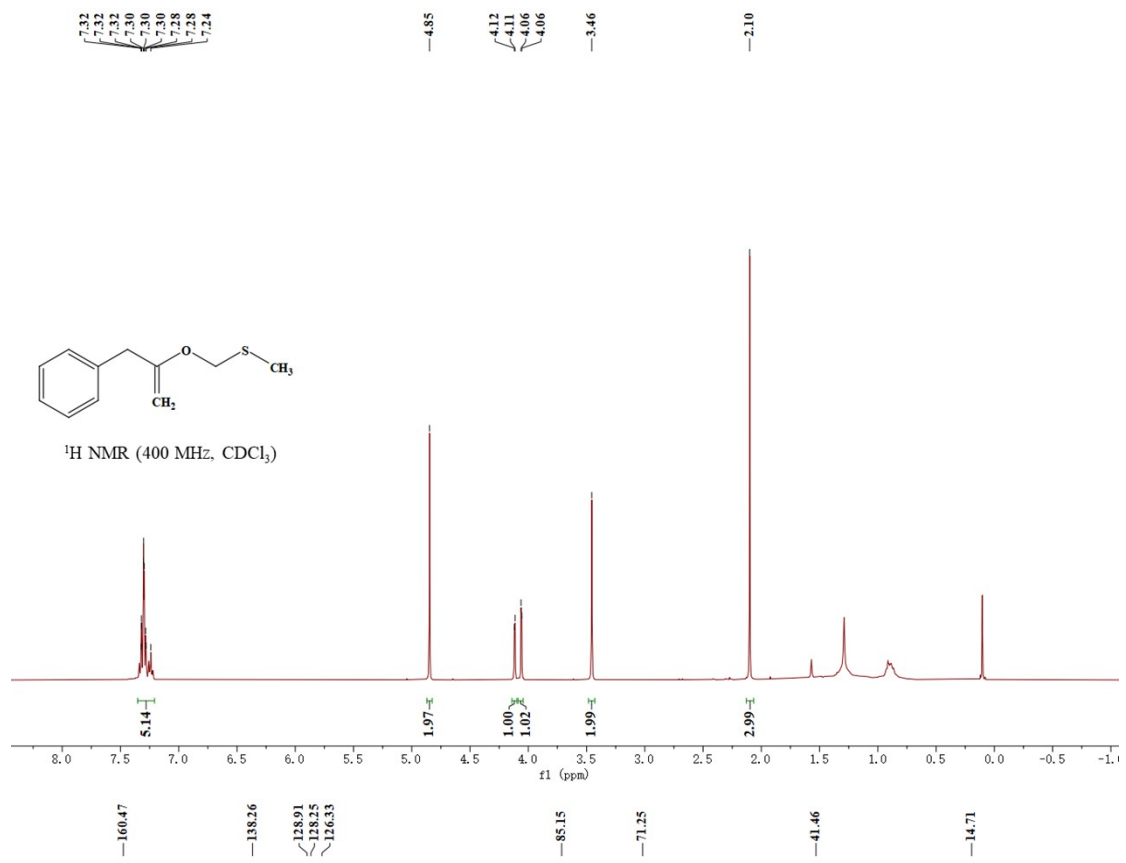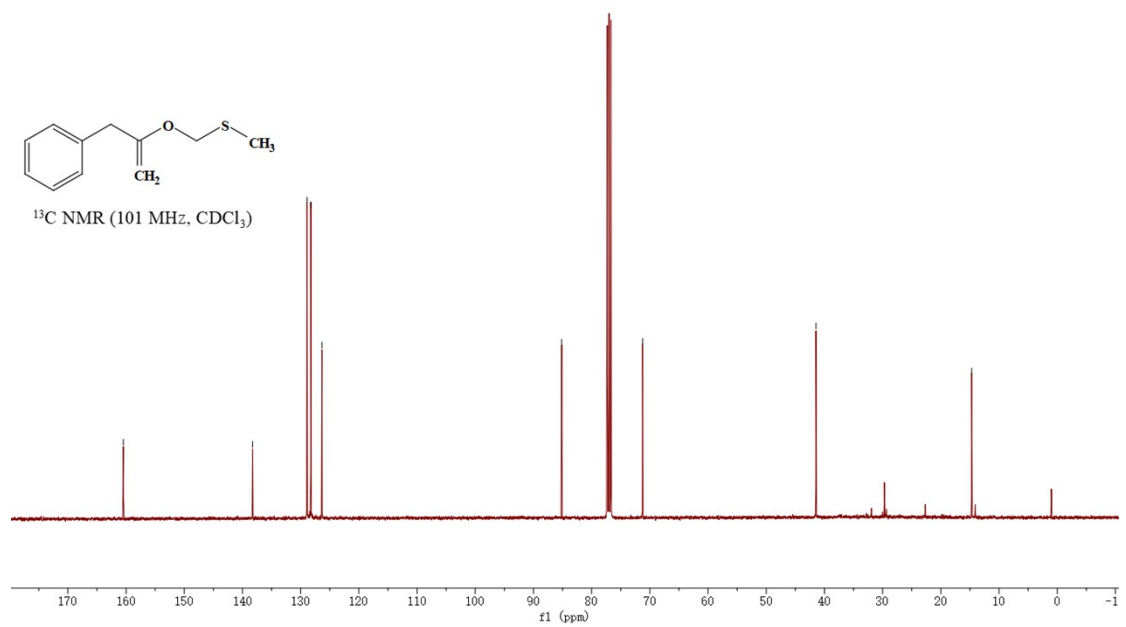

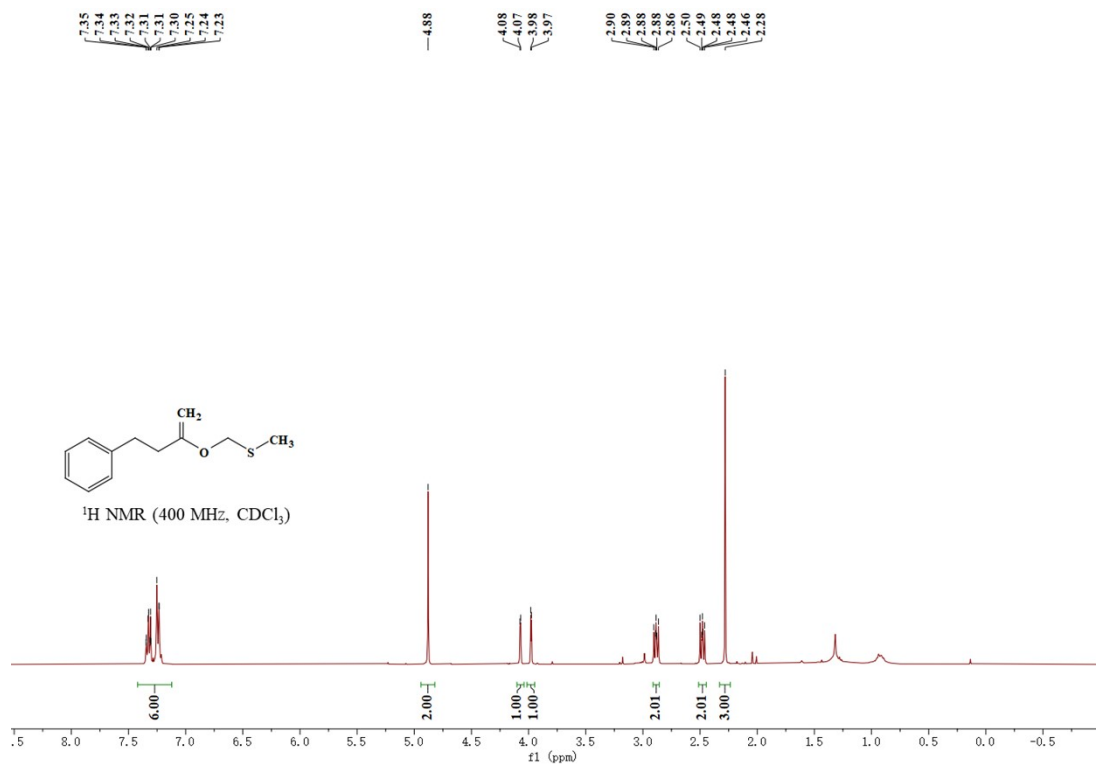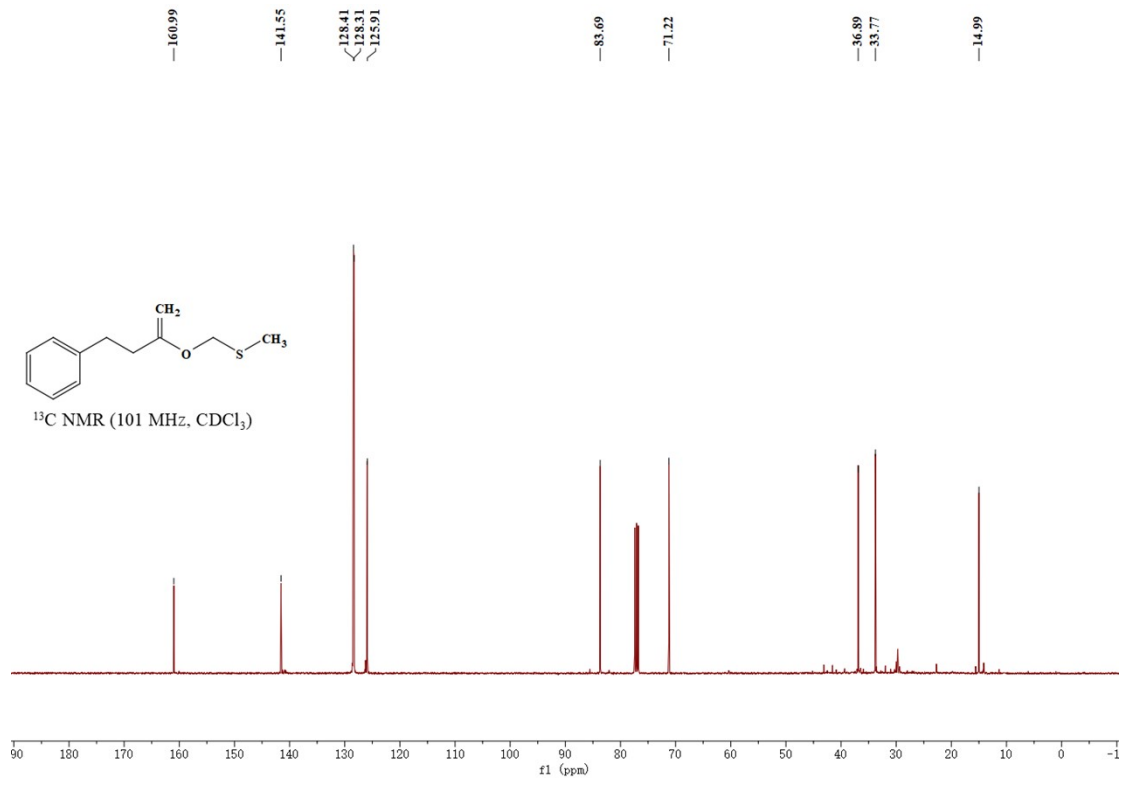

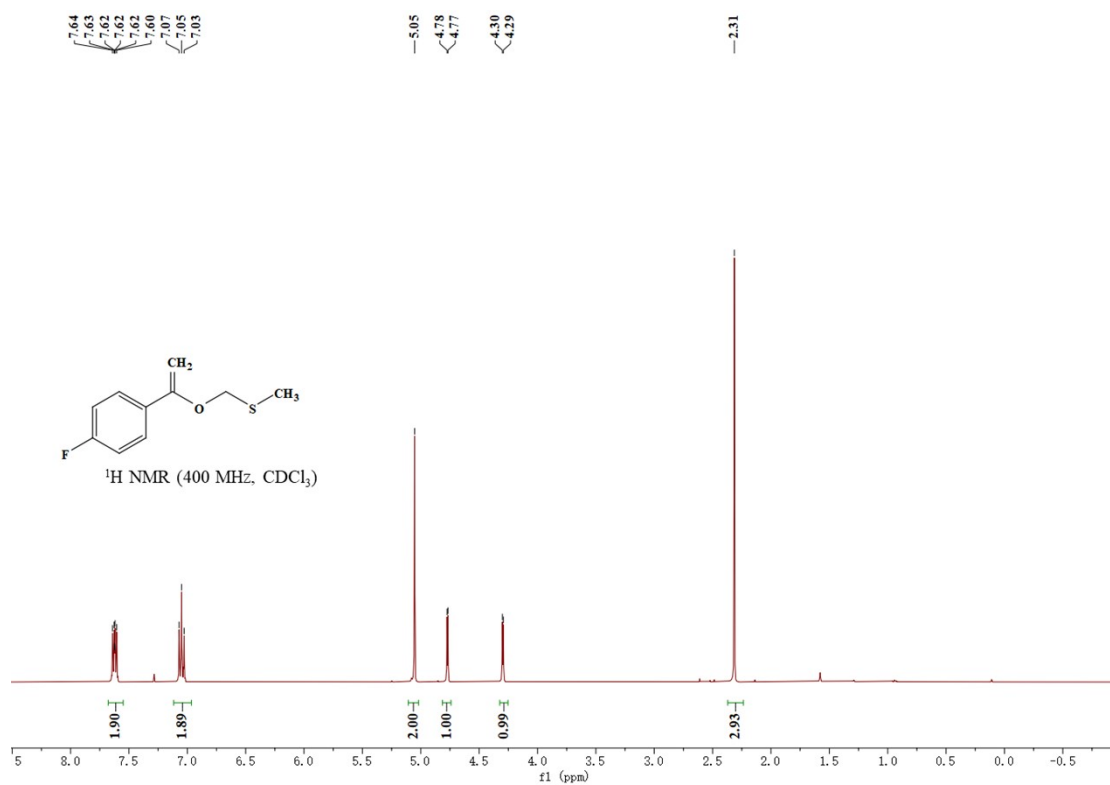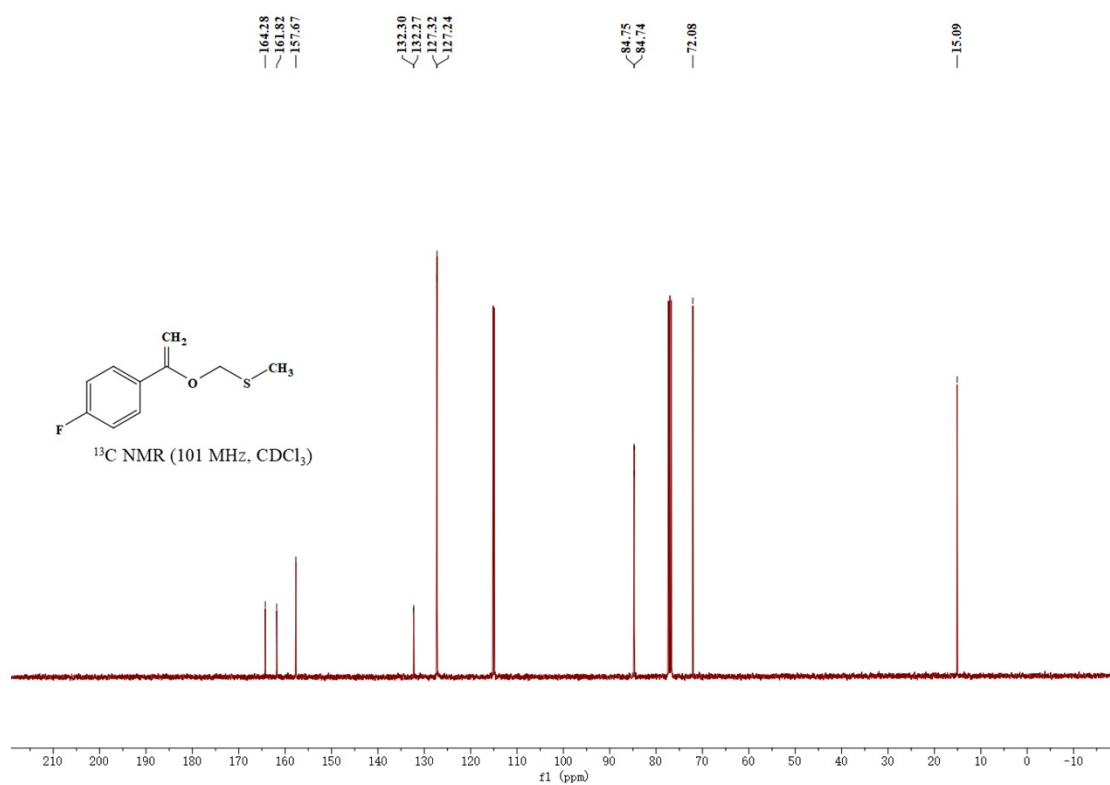

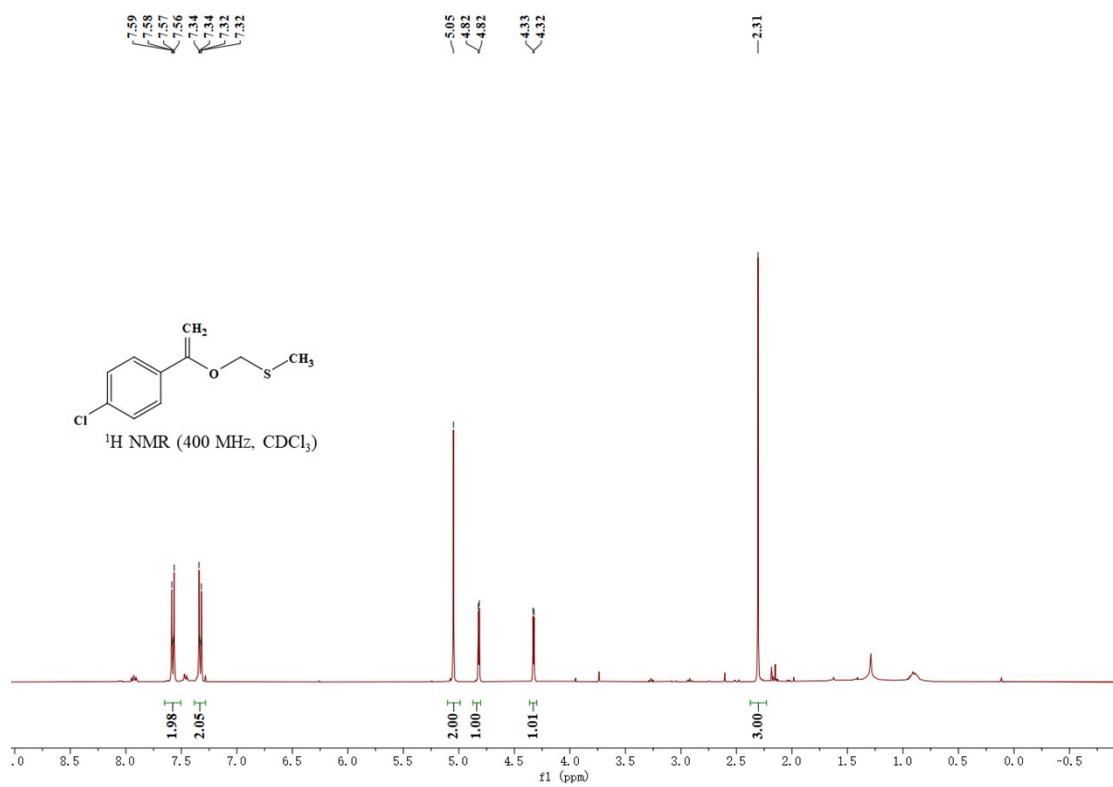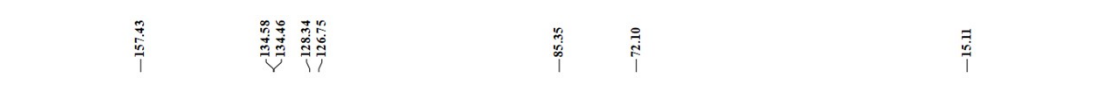

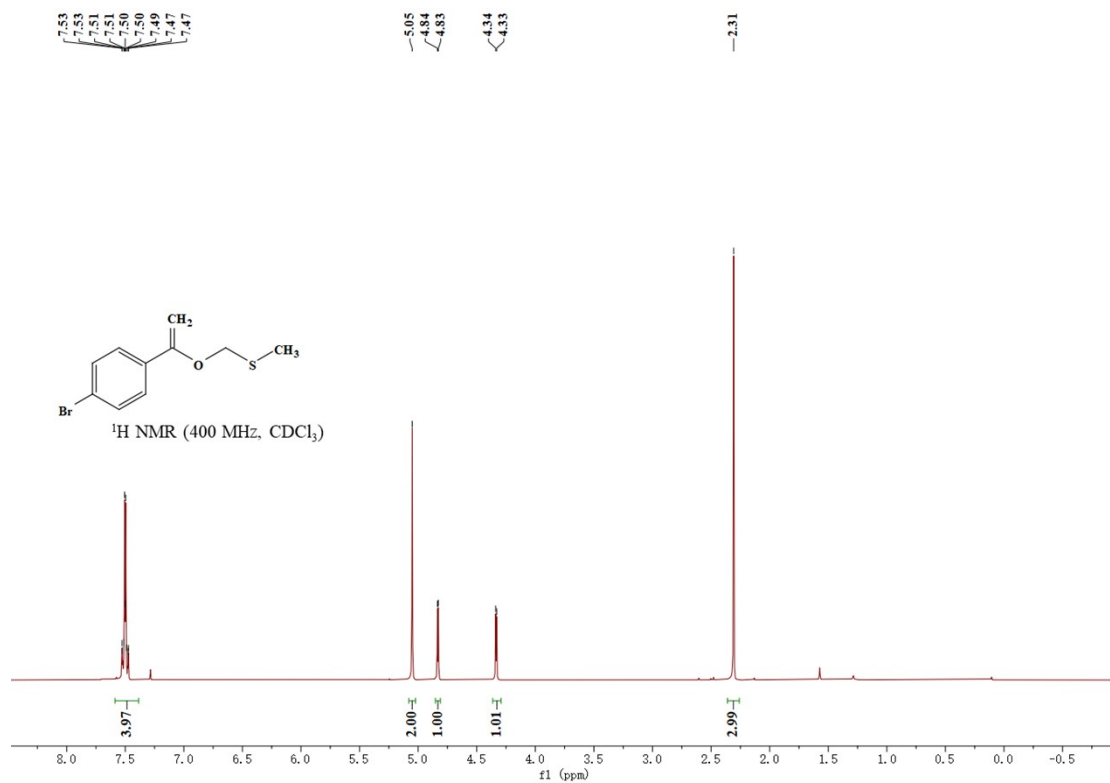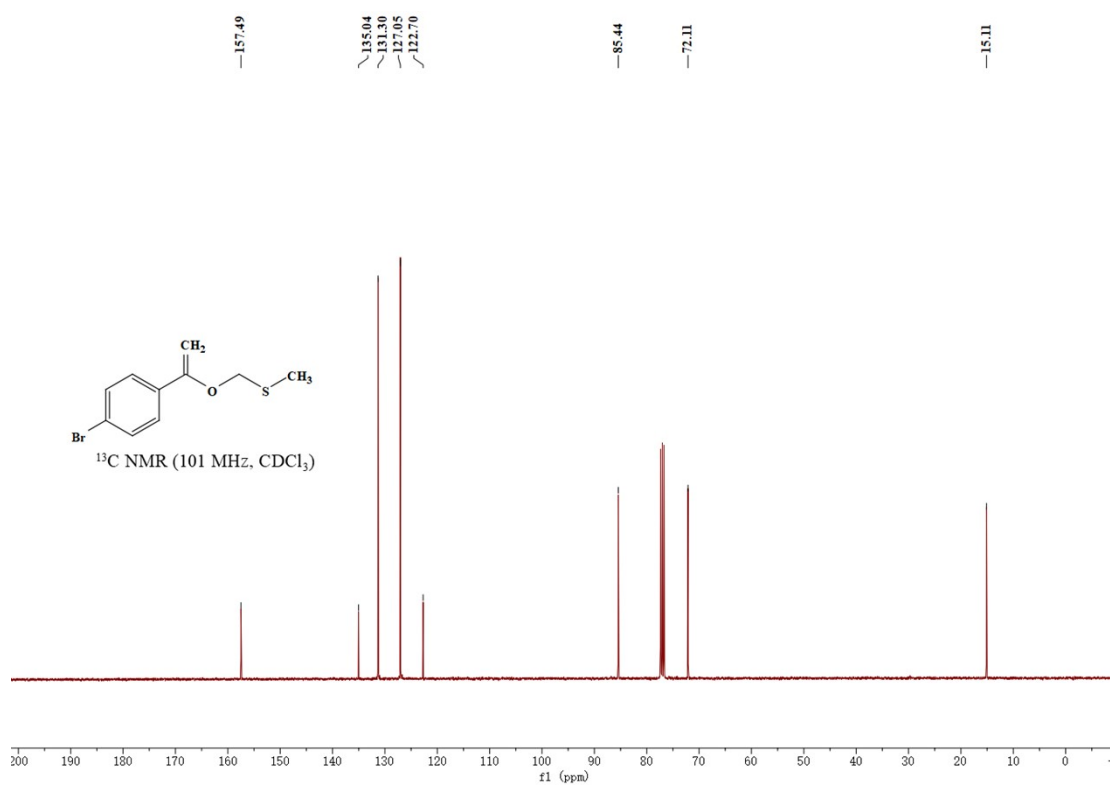

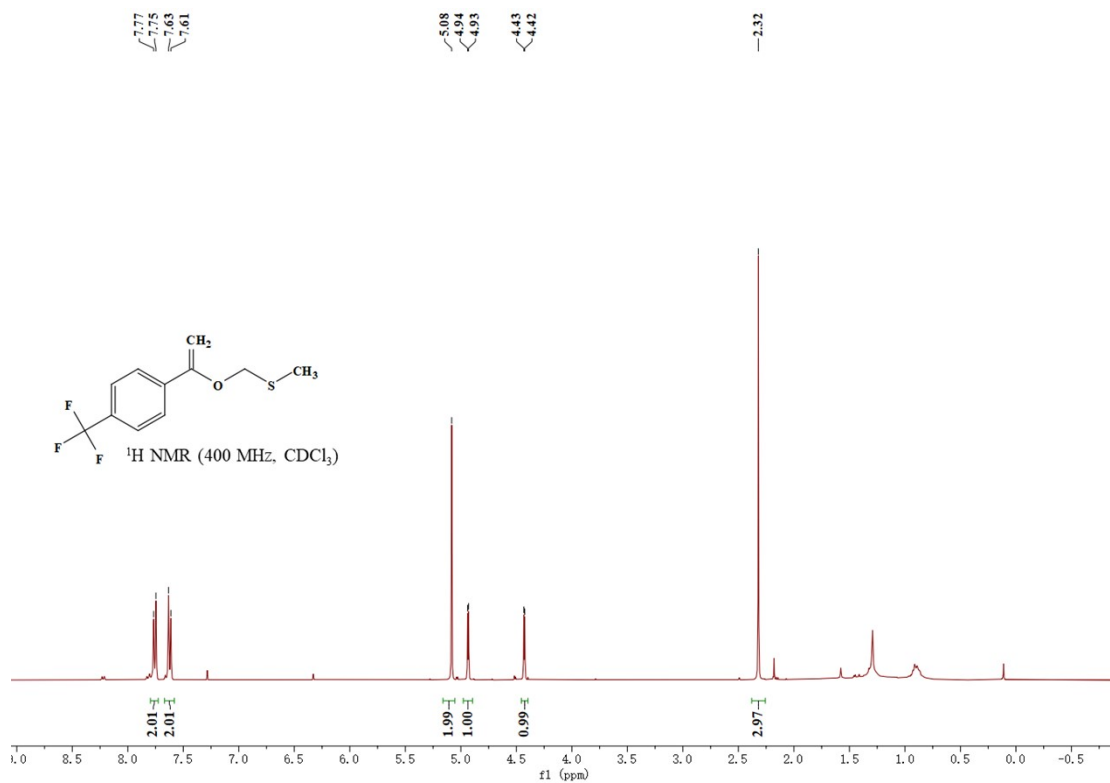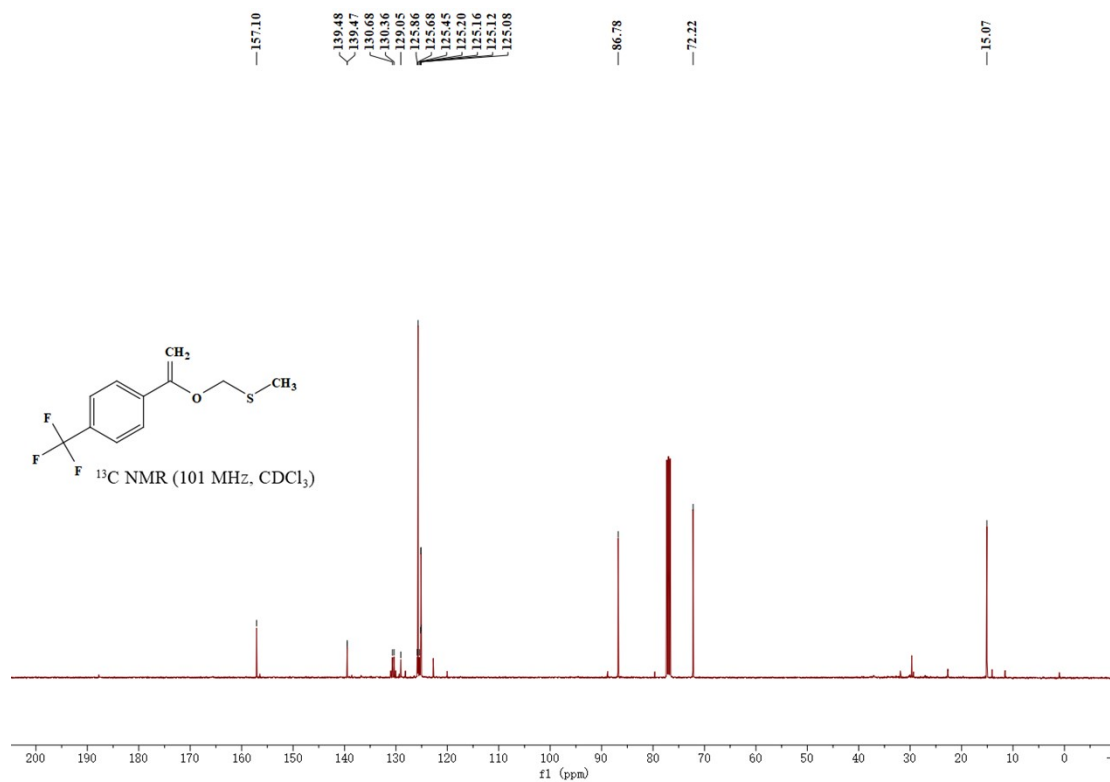

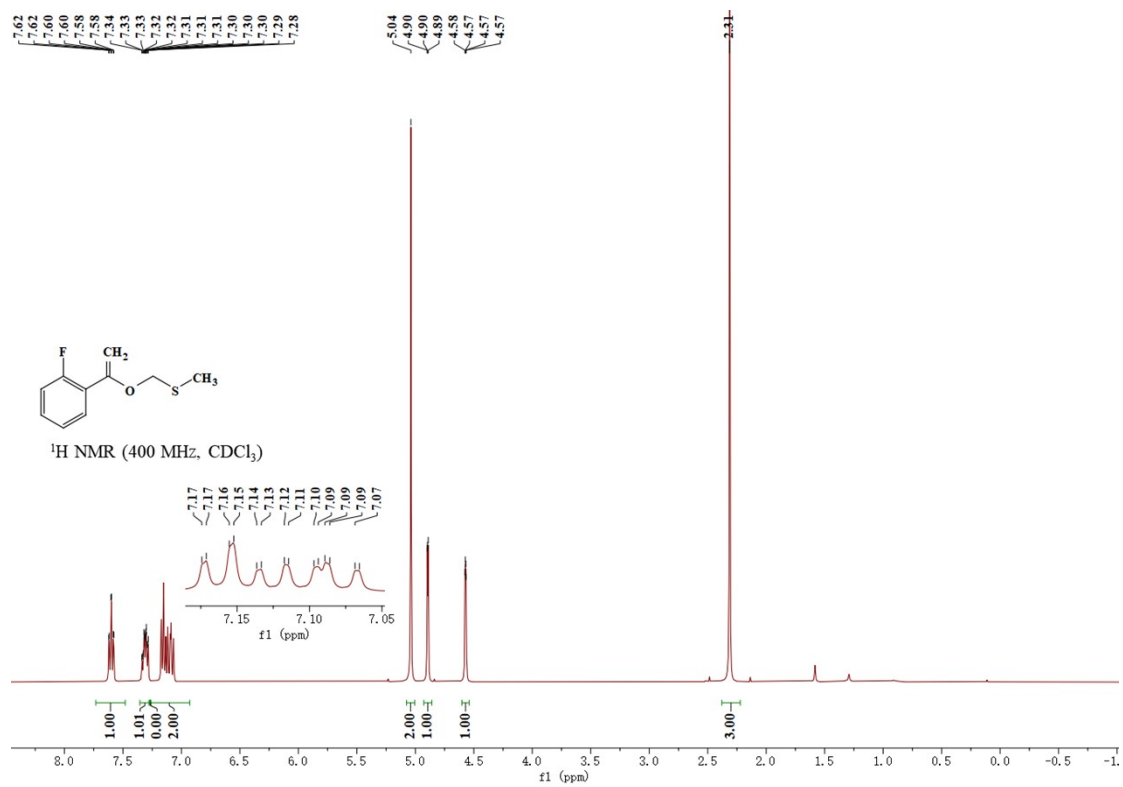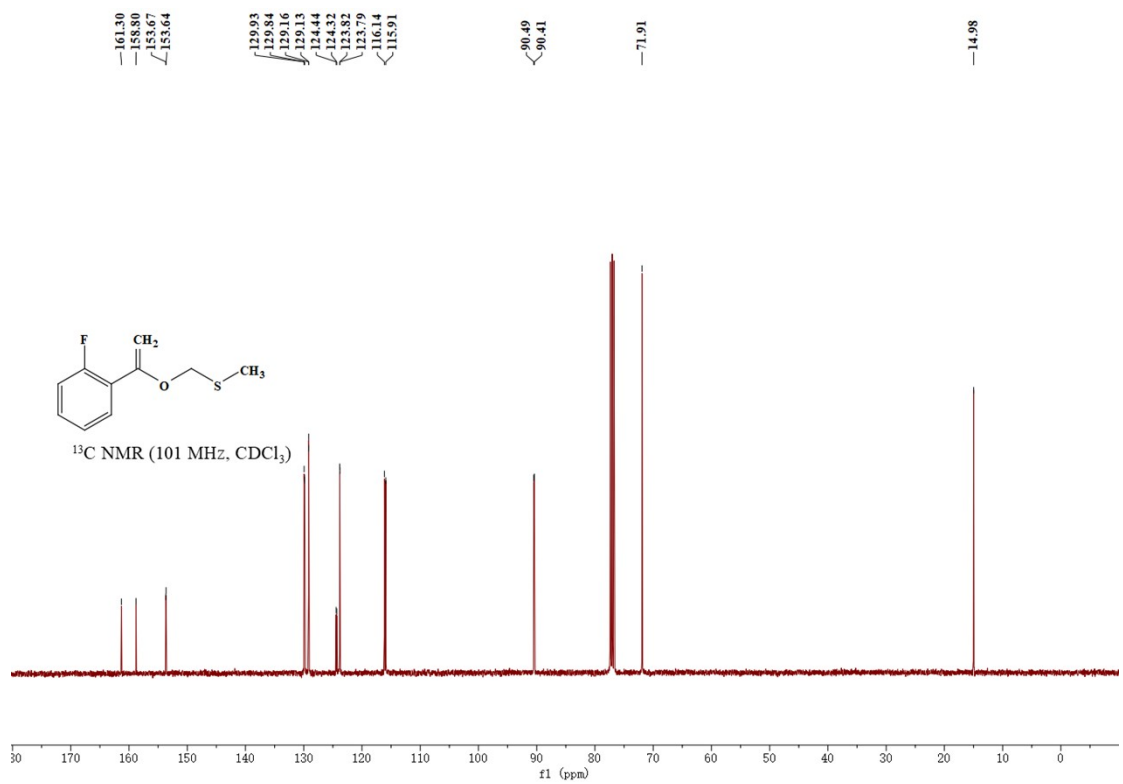



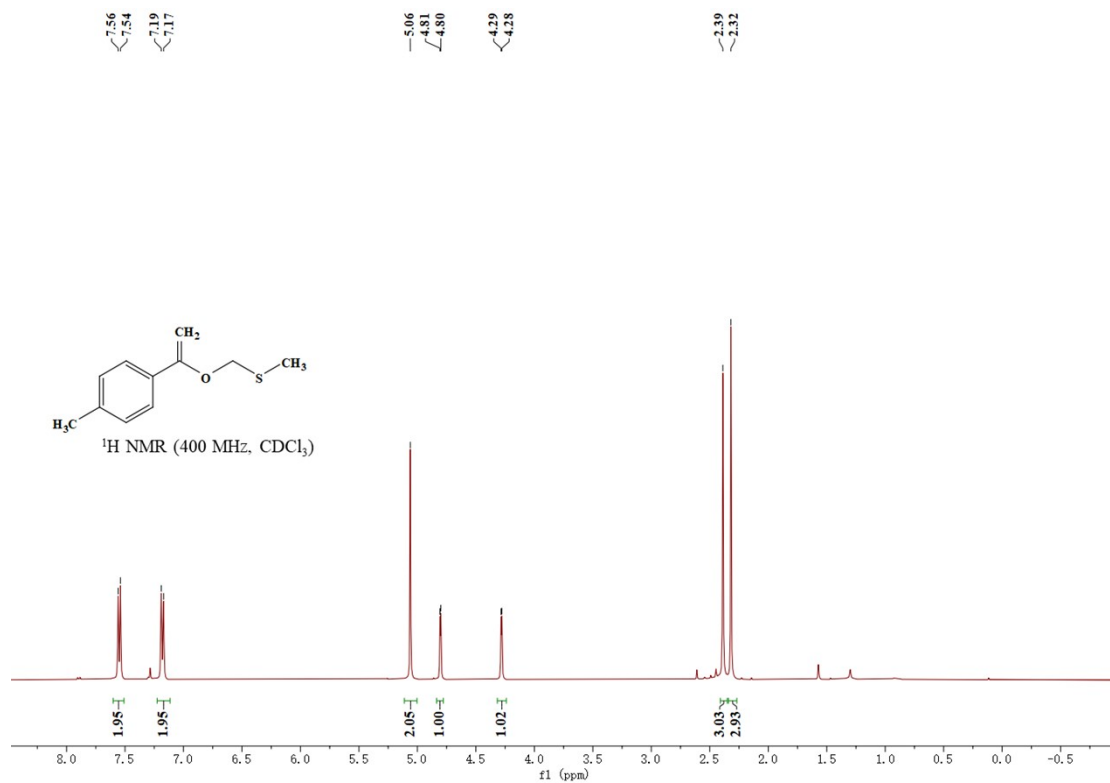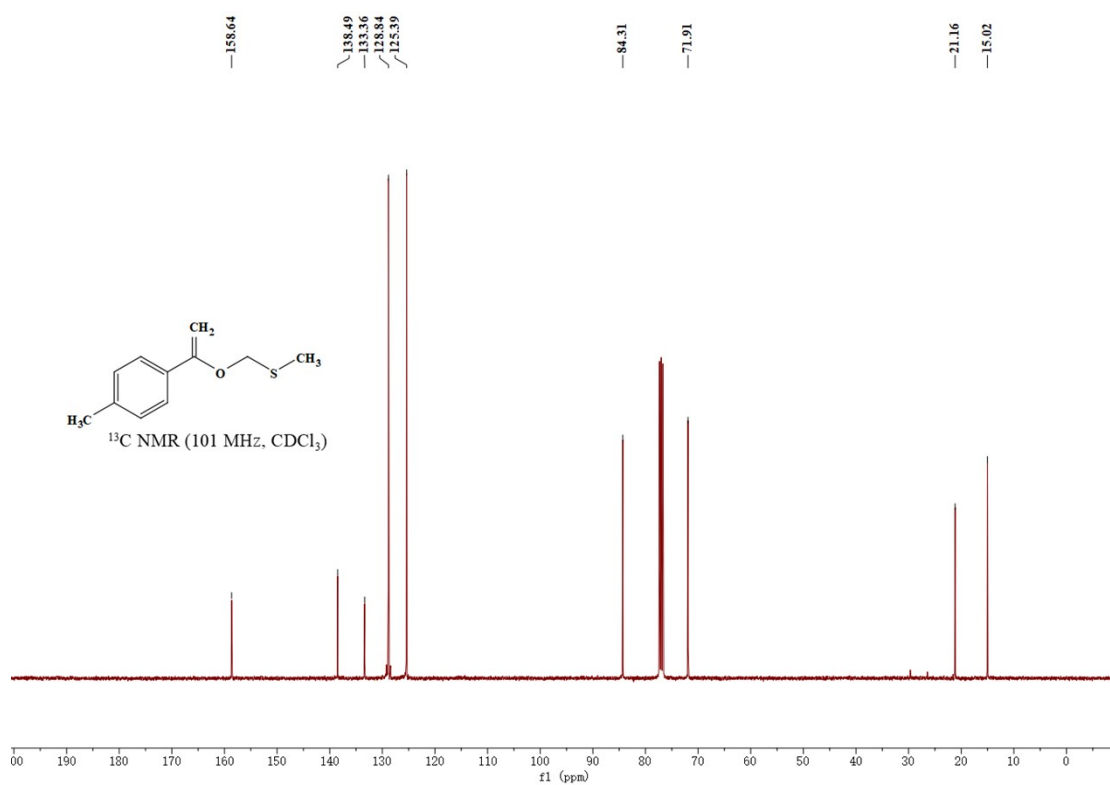

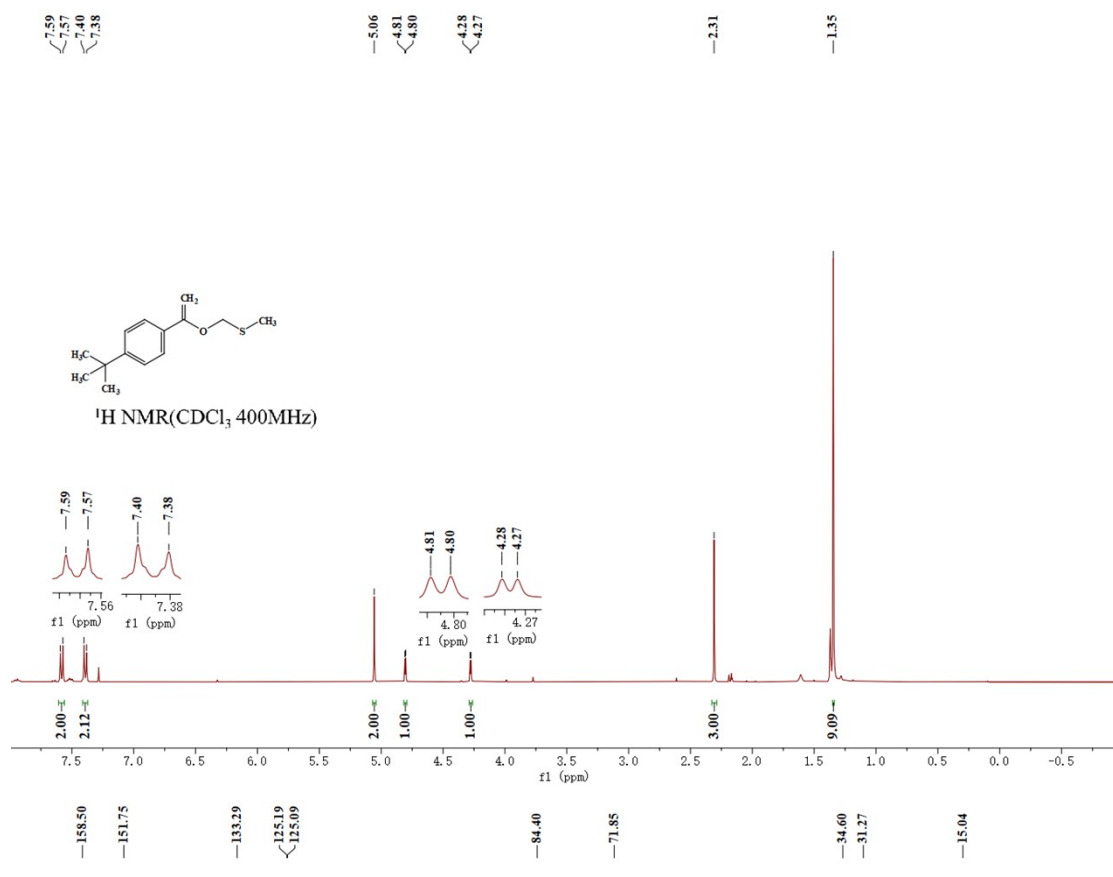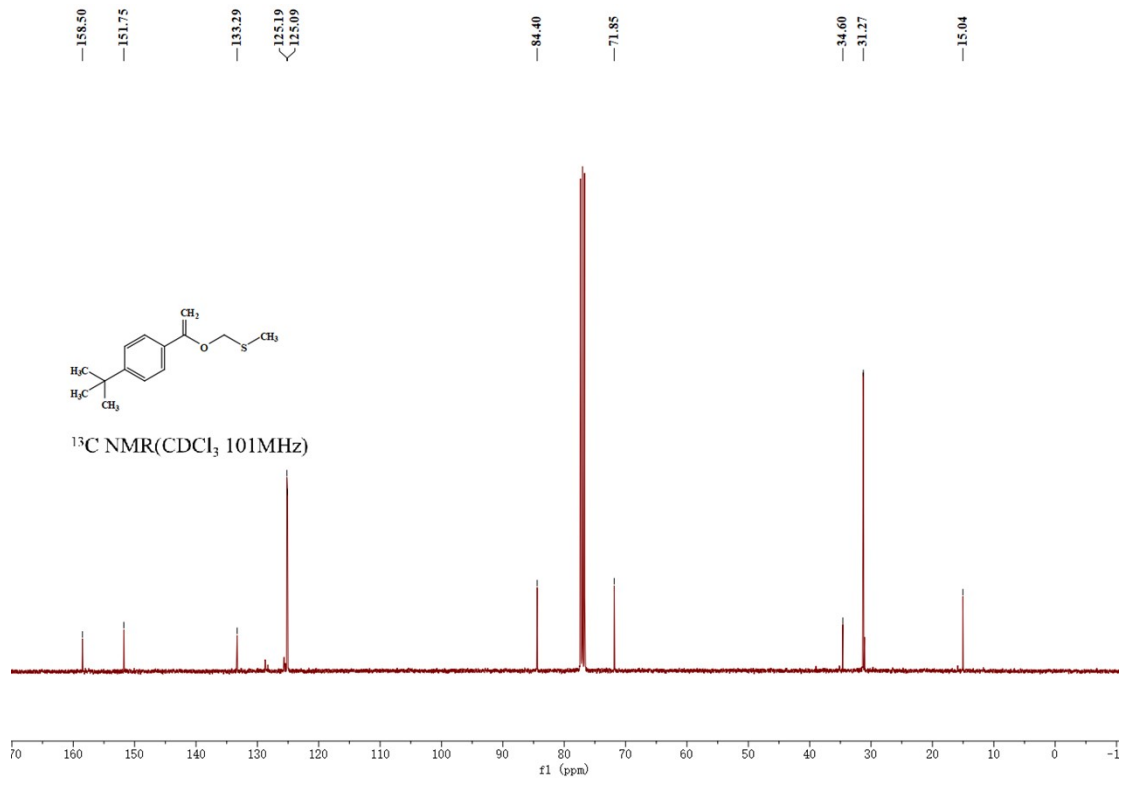

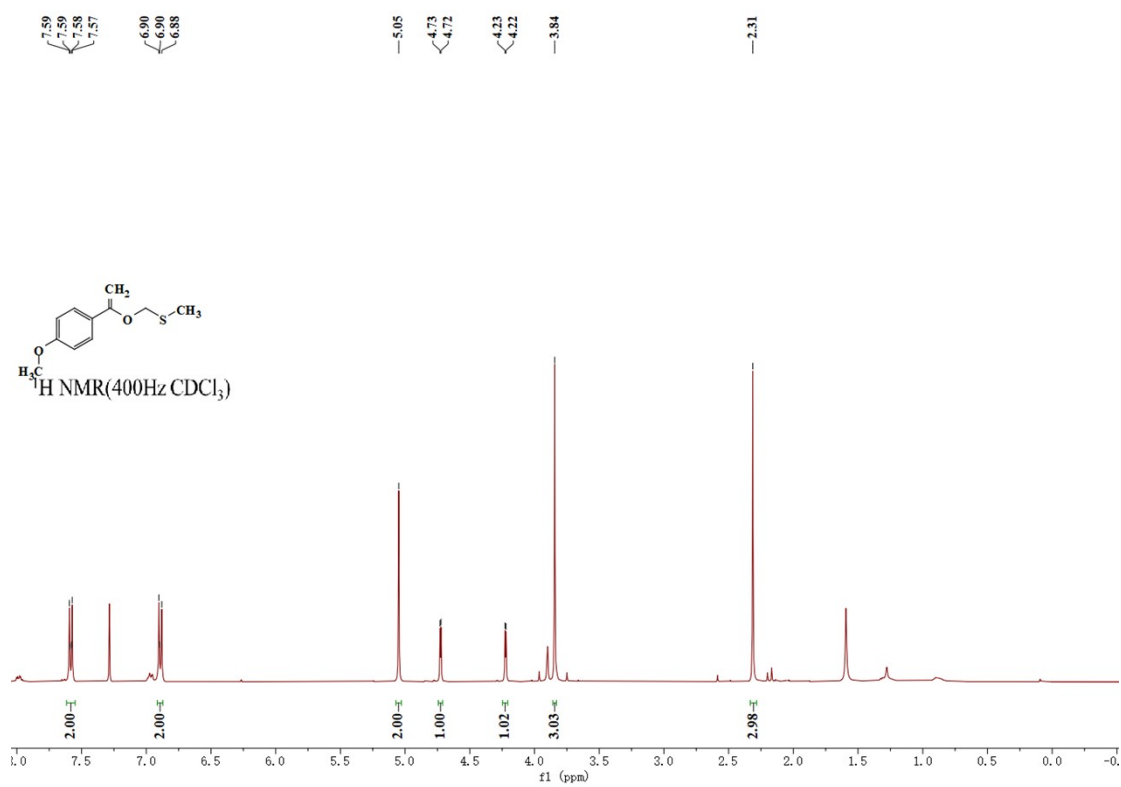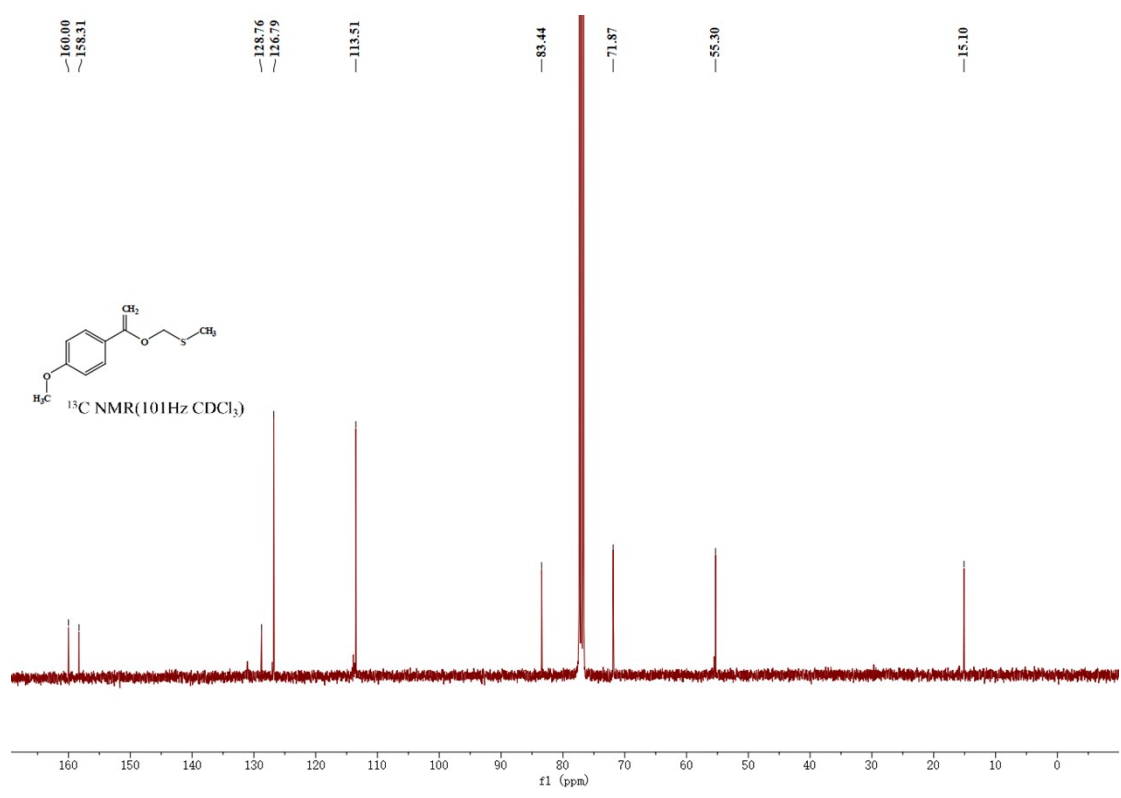

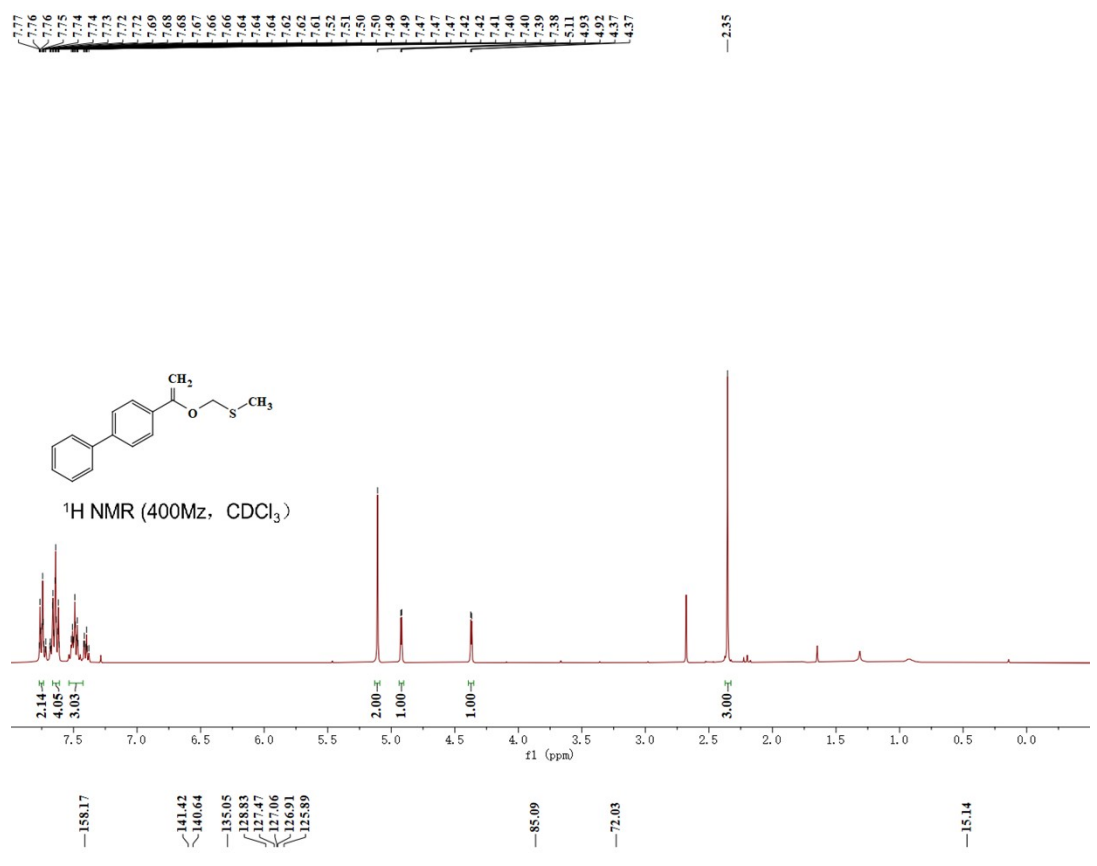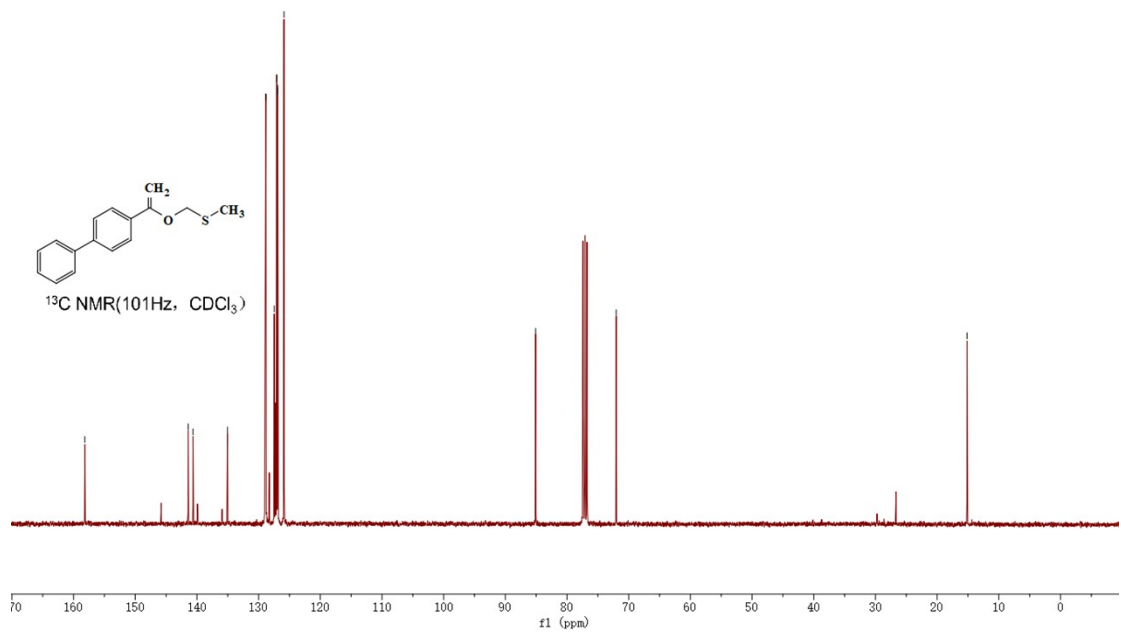

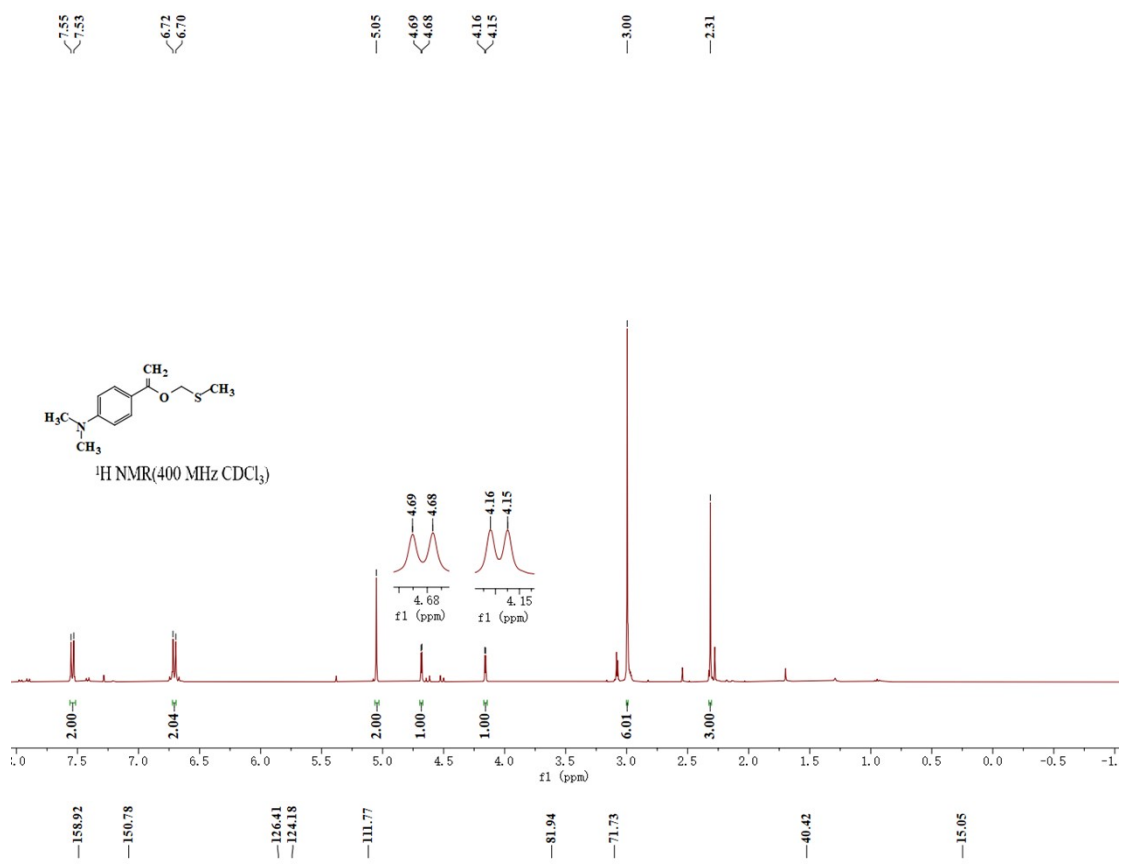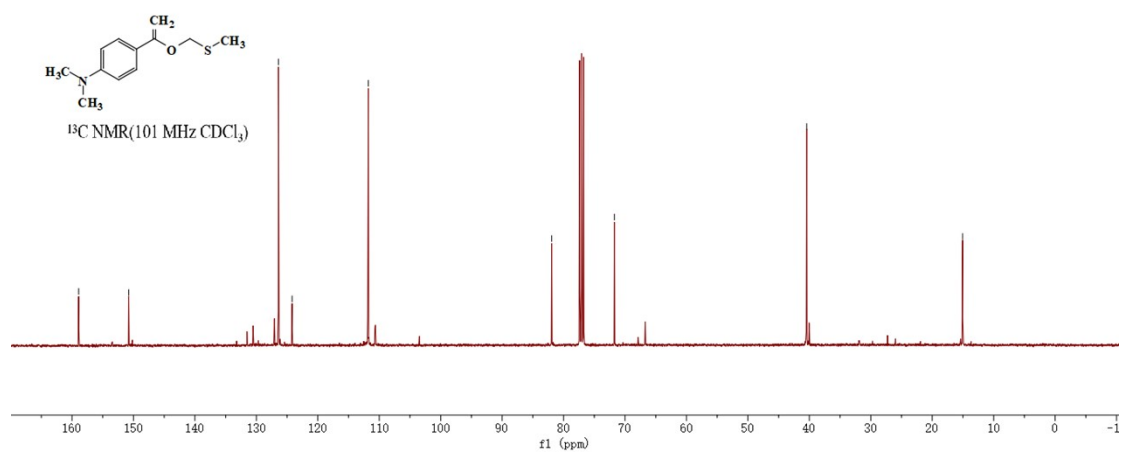

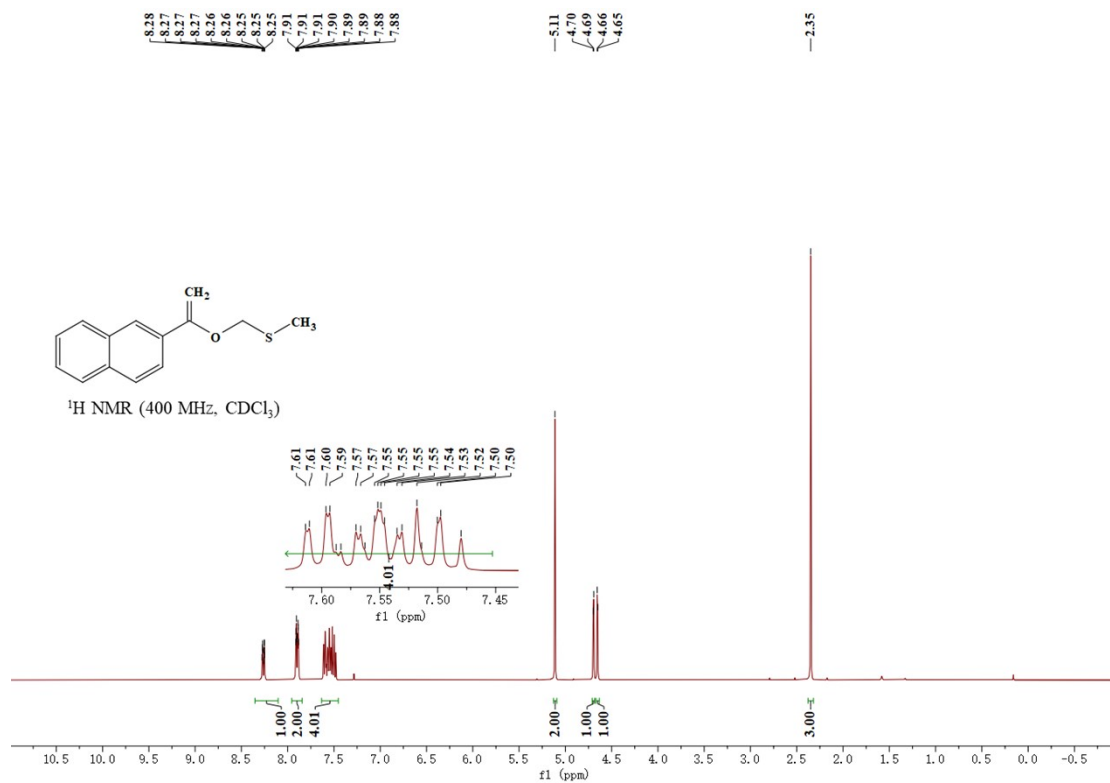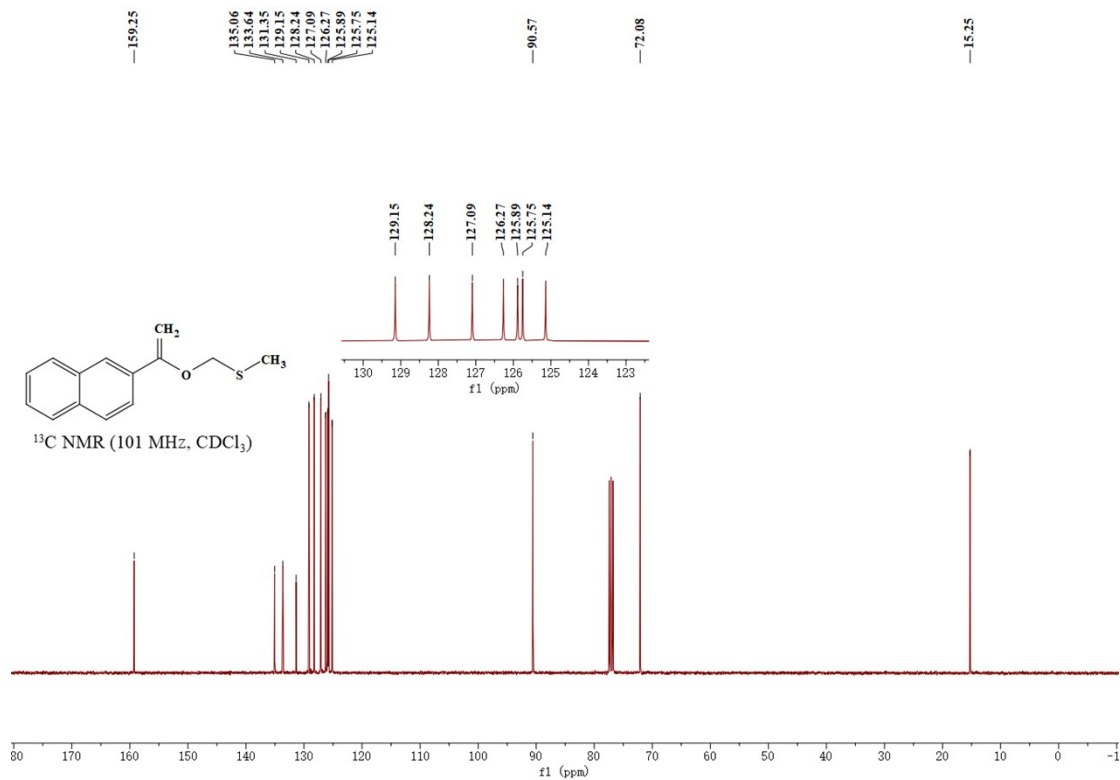

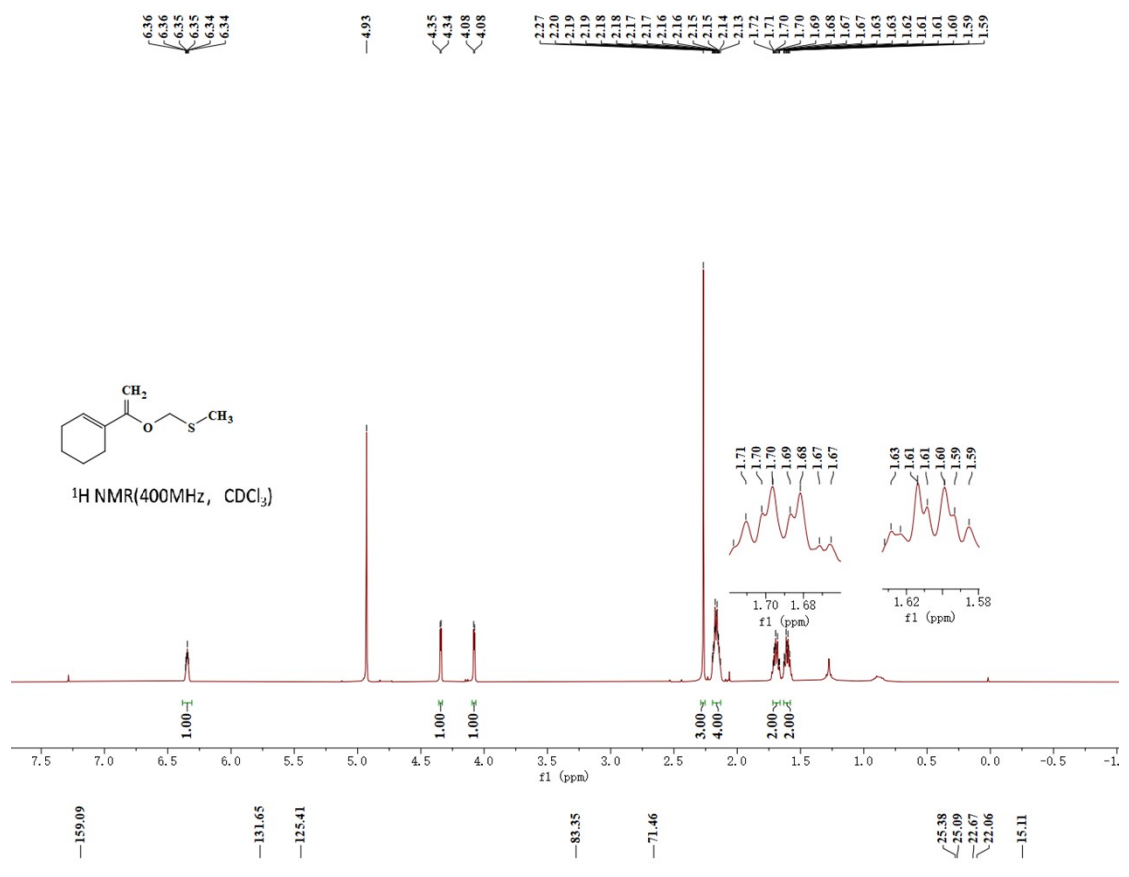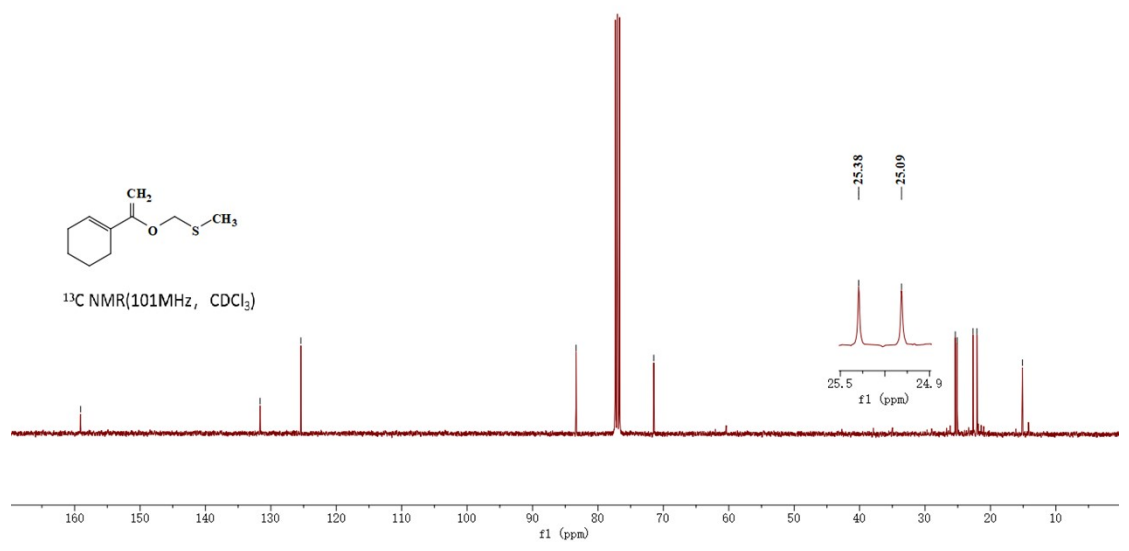

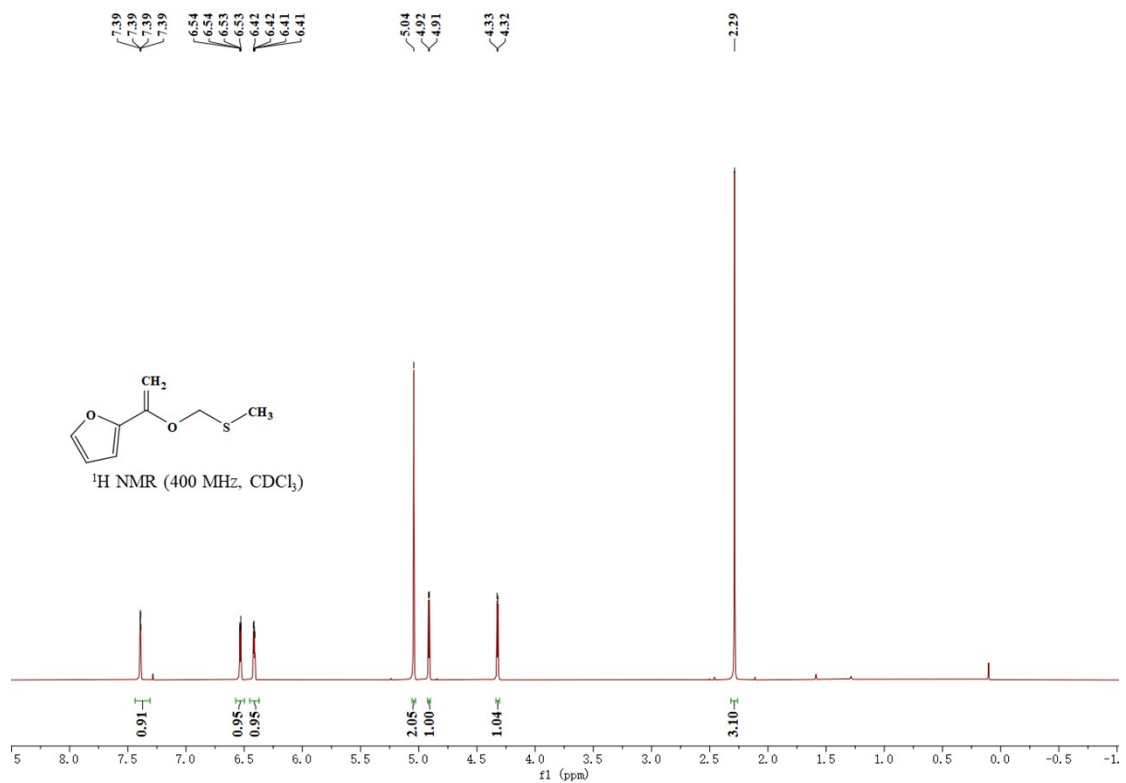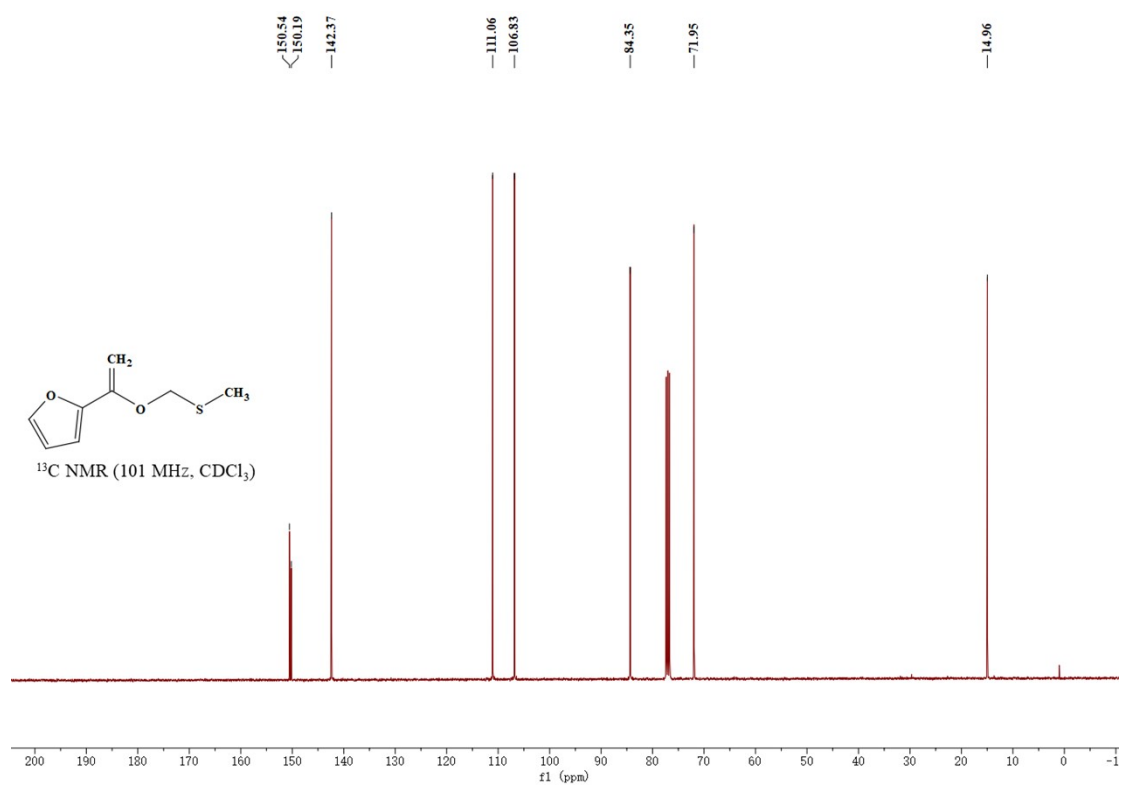



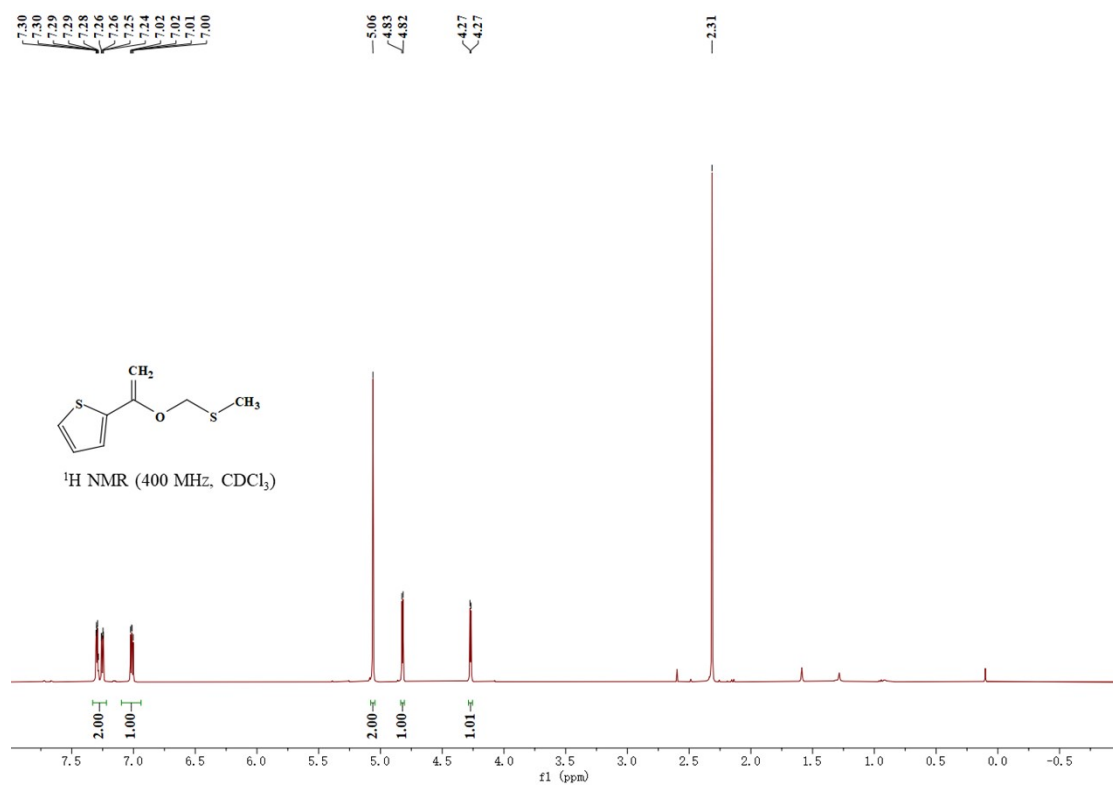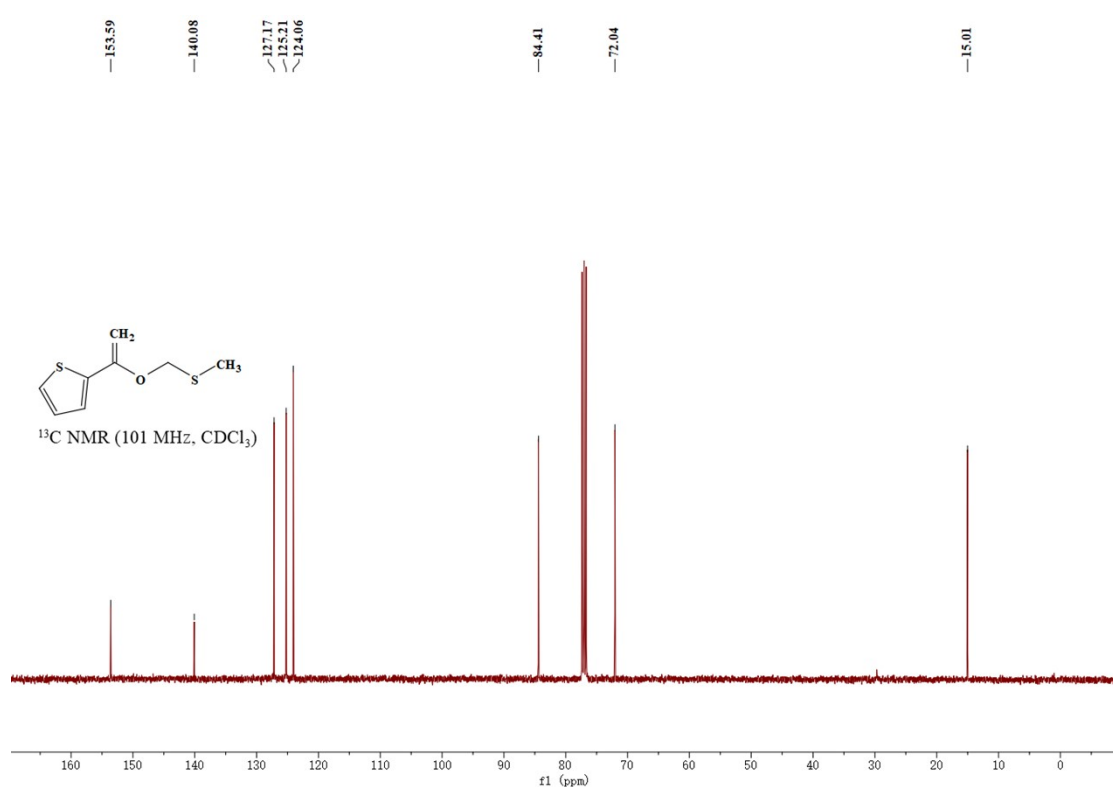

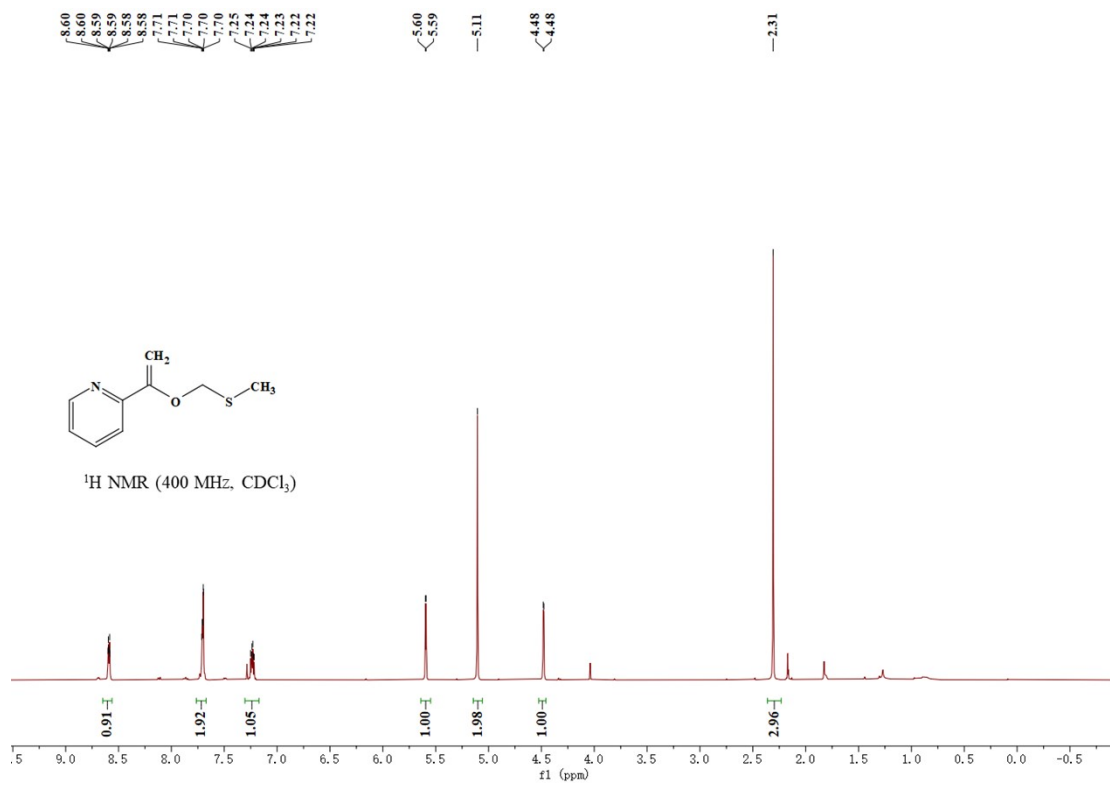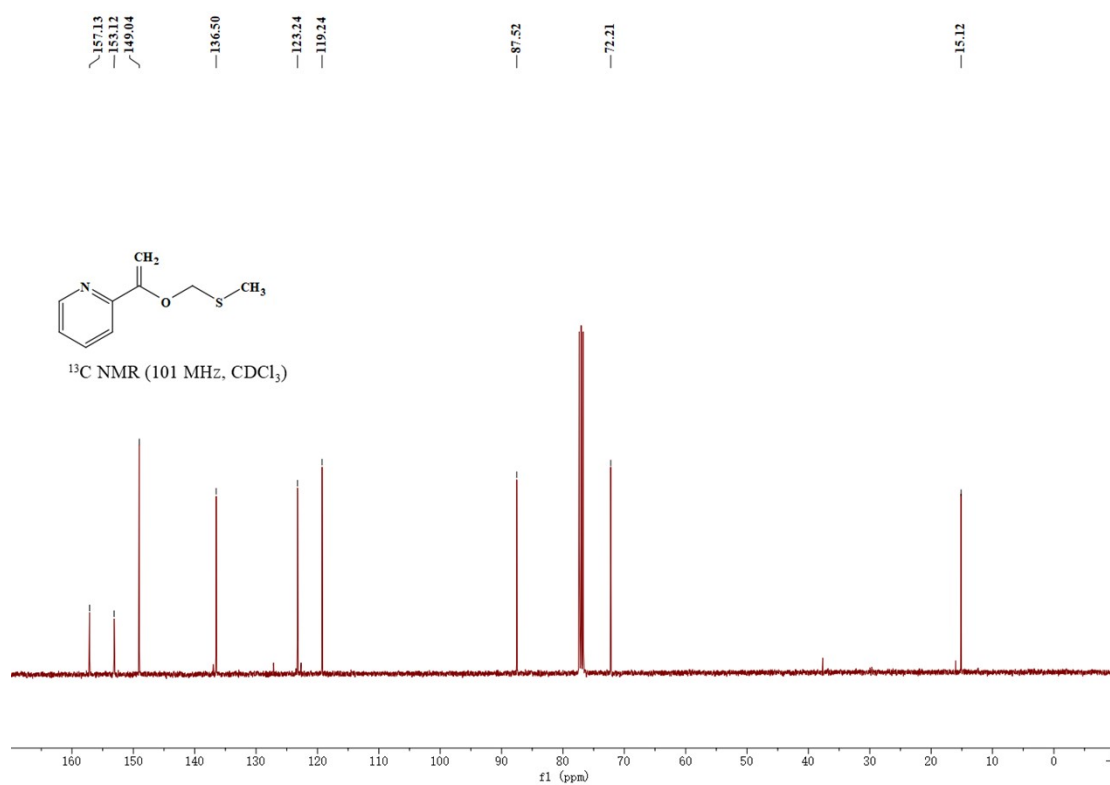

7.42  
7.41  
7.41  
7.40  
7.40  
7.40  
7.39  
7.39  
7.34  
7.33  
7.33  
7.32  
7.31  
7.30  
7.30  
7.22  
7.22  
7.22  
7.21  
7.21  
7.20  
7.19  
7.18  
-4.82  
4.41  
4.40  
4.13  
4.13  
-1.93  
-1.52

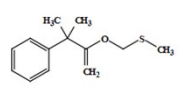

<sup>1</sup>H NMR (400 MHz CDCl<sub>3</sub>)

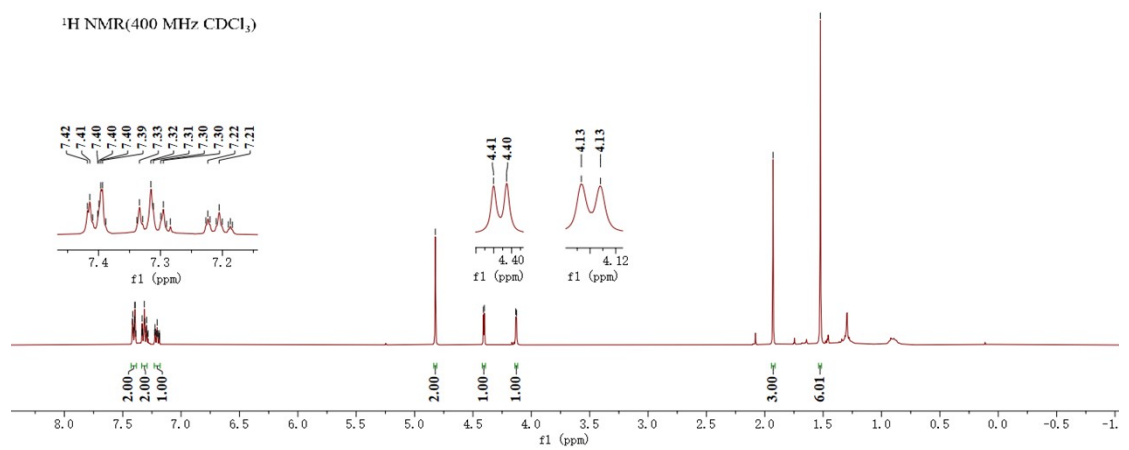

167.12  
147.58  
127.95  
126.00  
125.81  
82.76  
70.94  
43.77  
27.91  
14.52

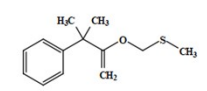

<sup>13</sup>C NMR (101 MHz CDCl<sub>3</sub>)

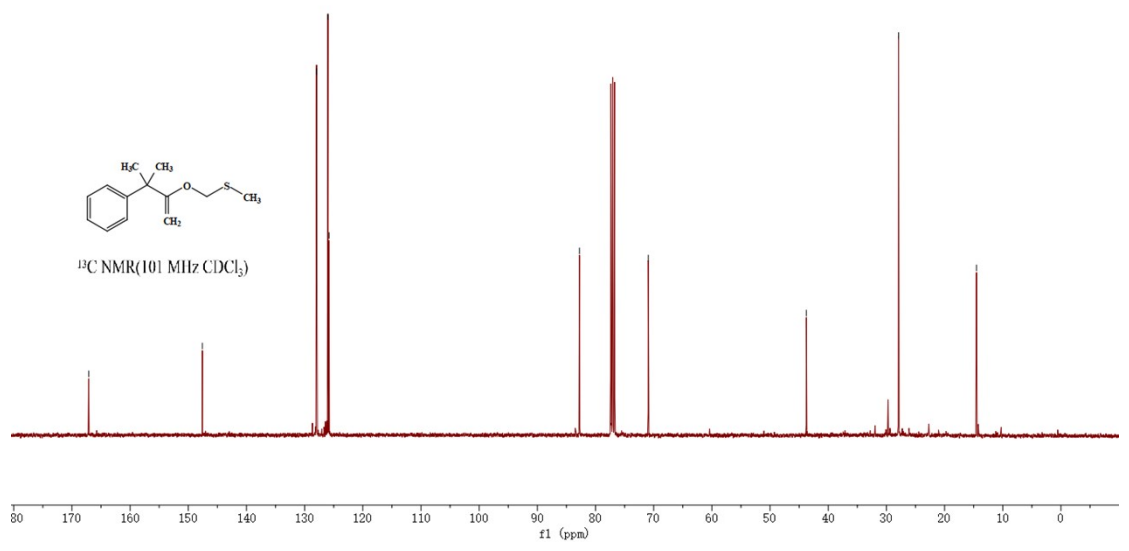

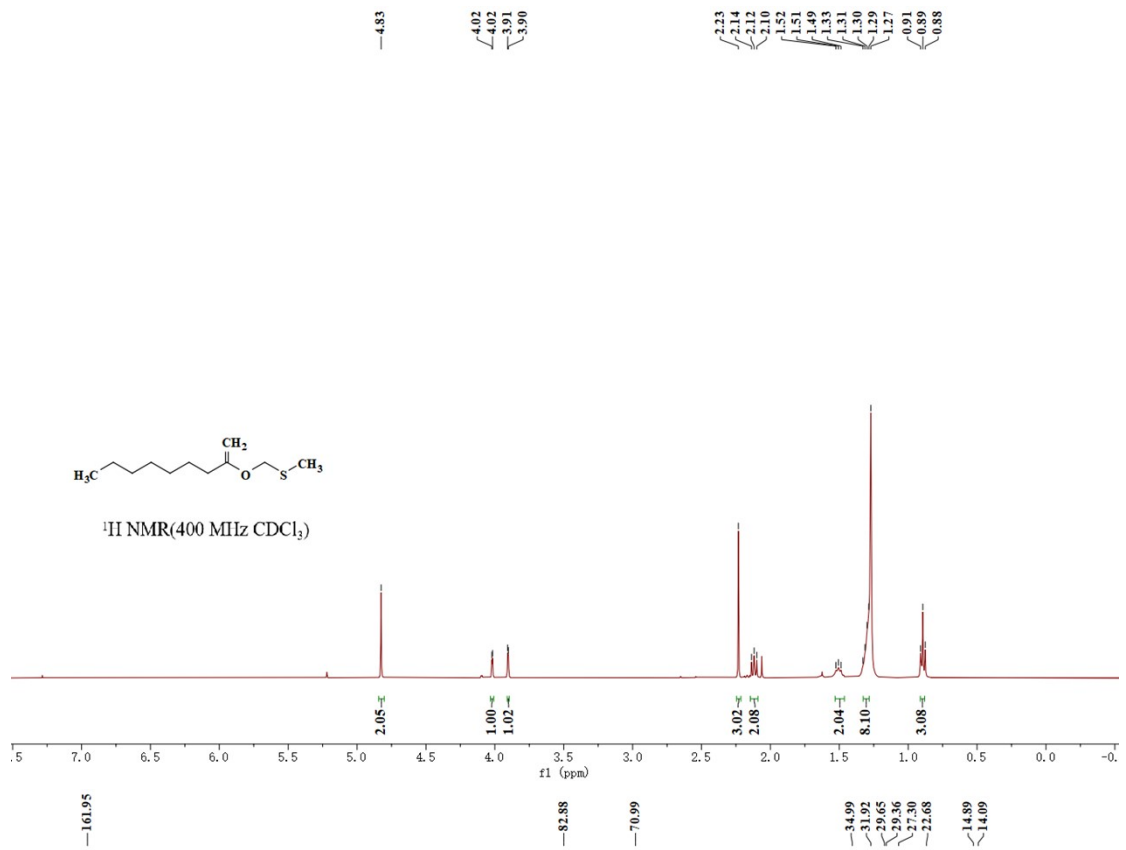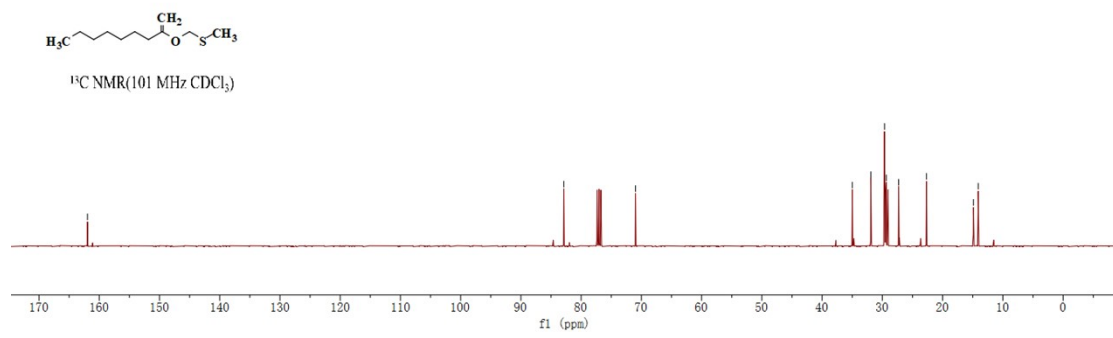

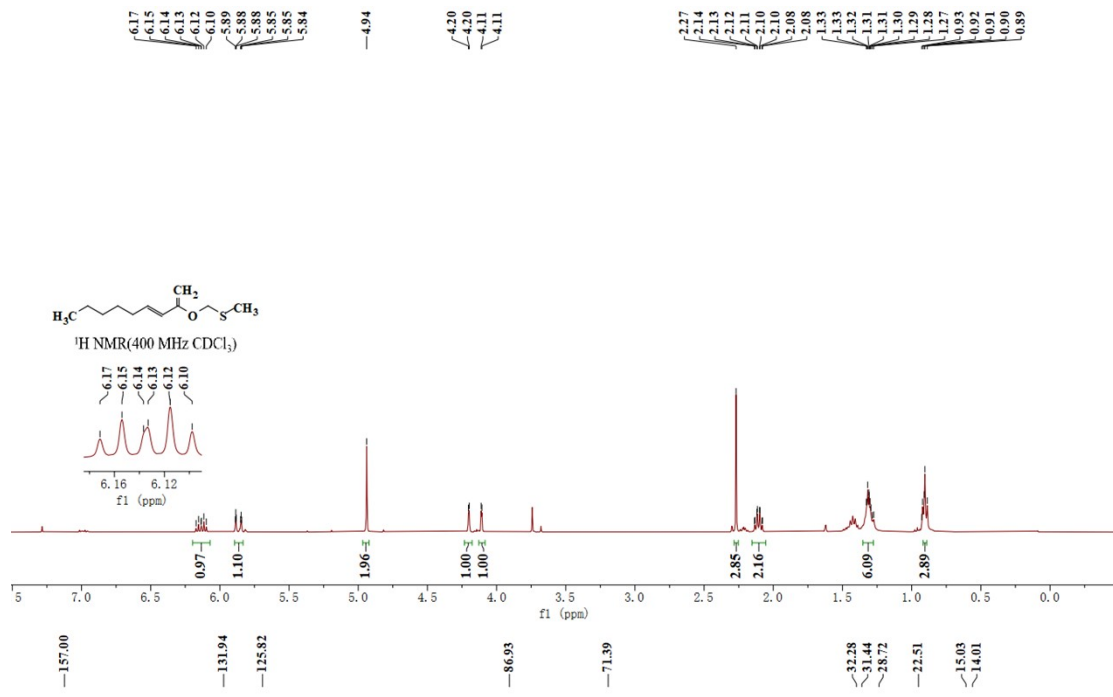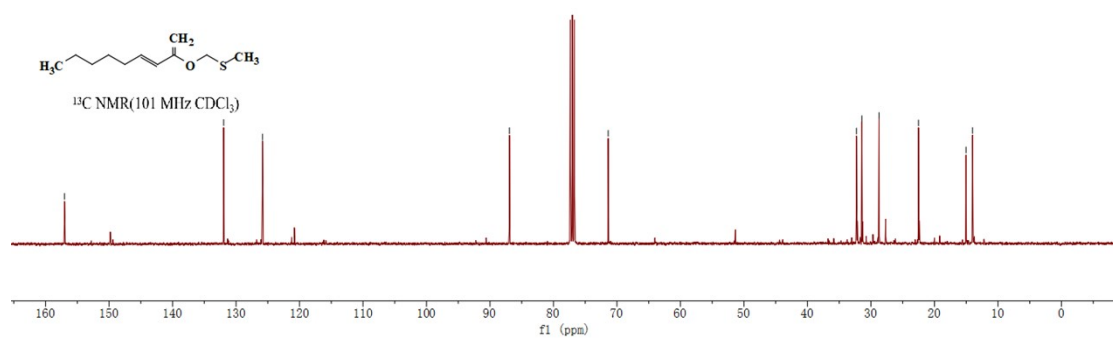

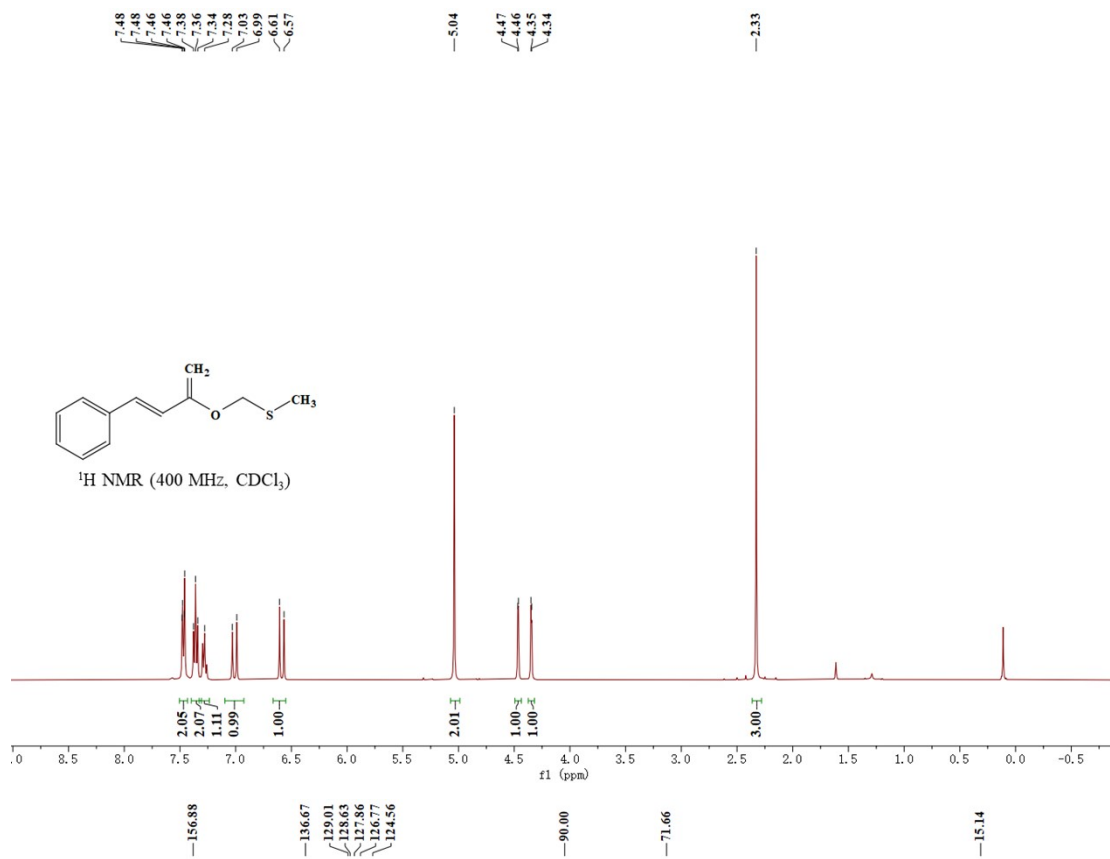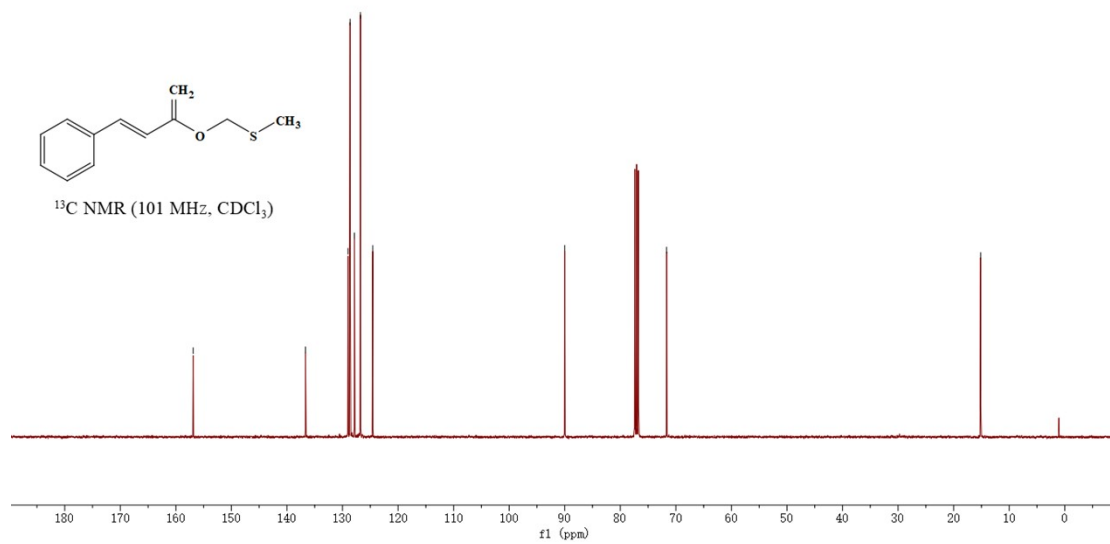

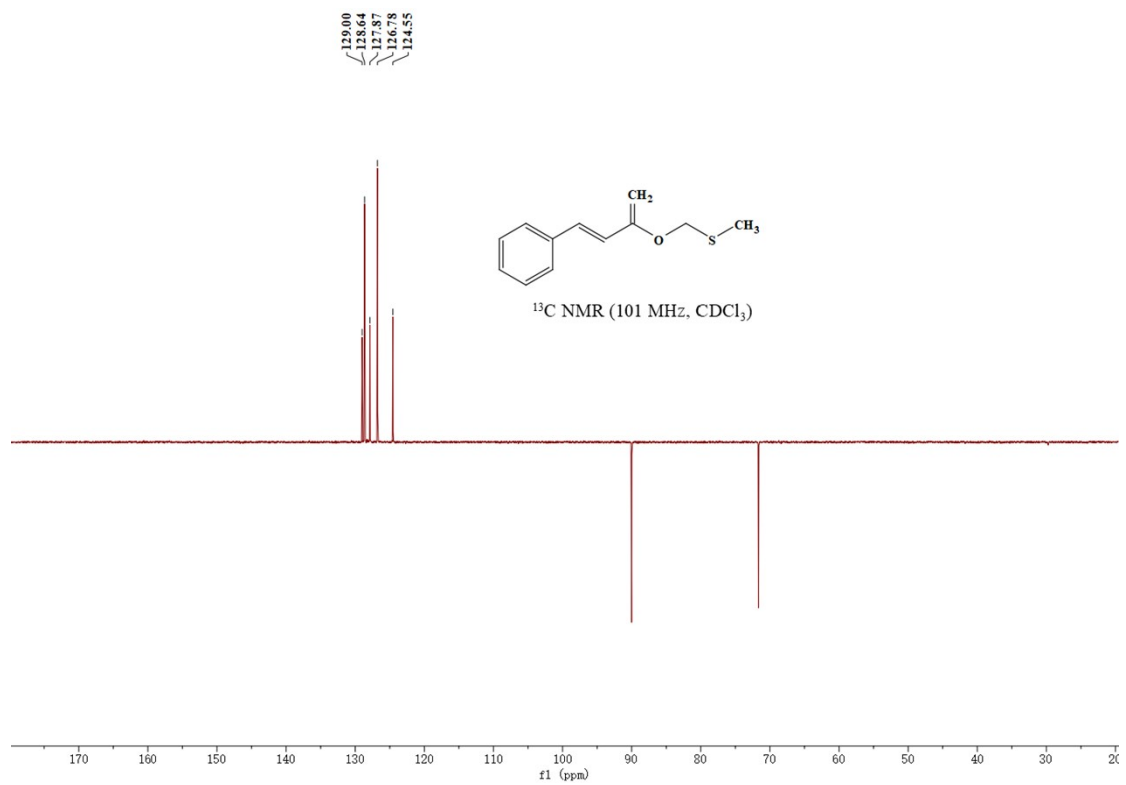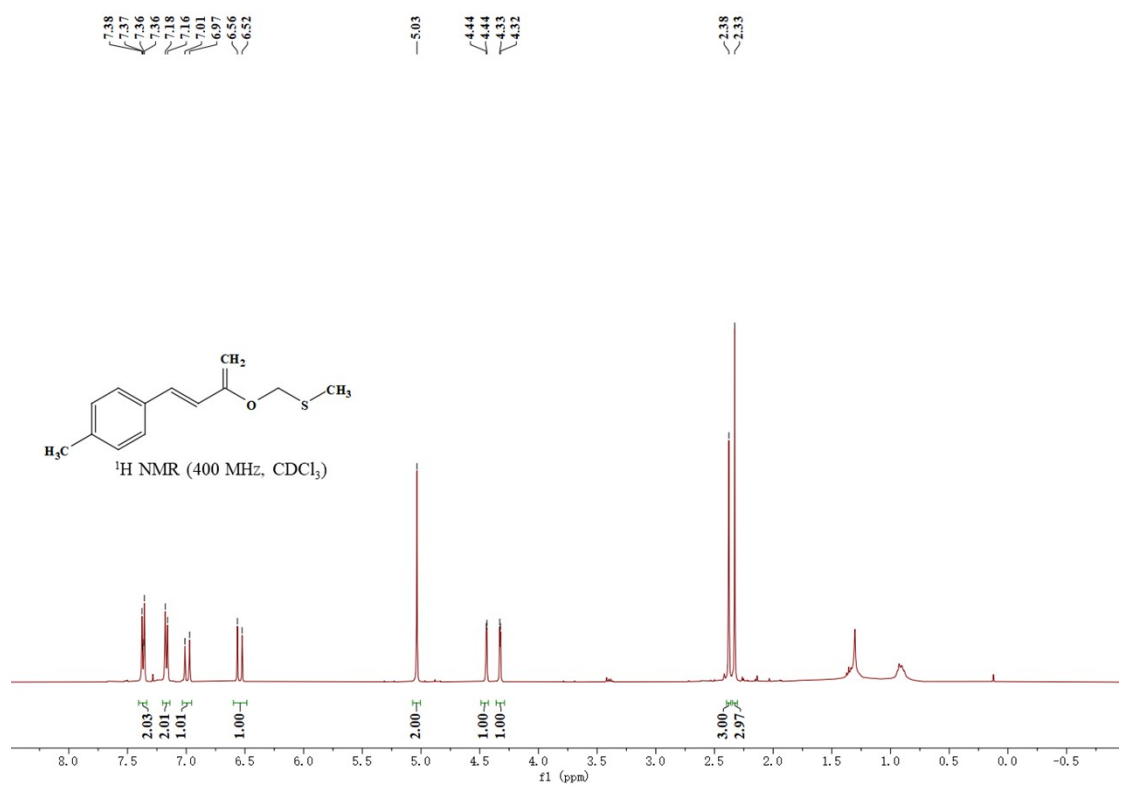

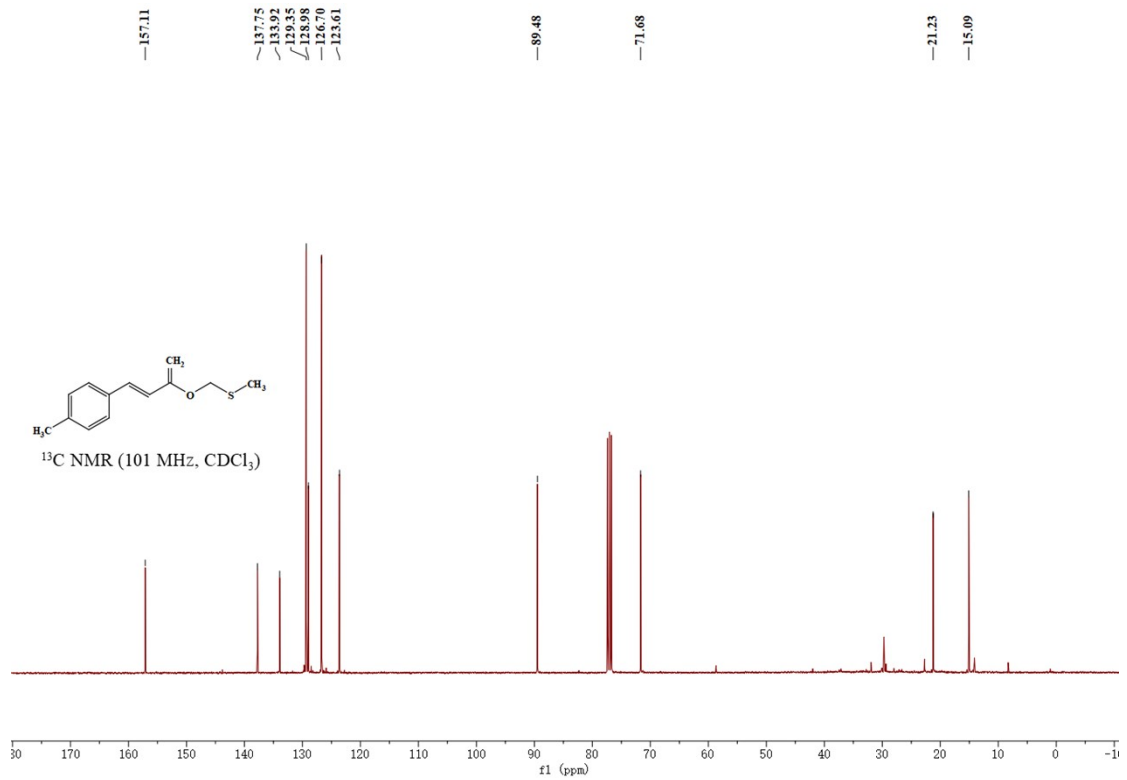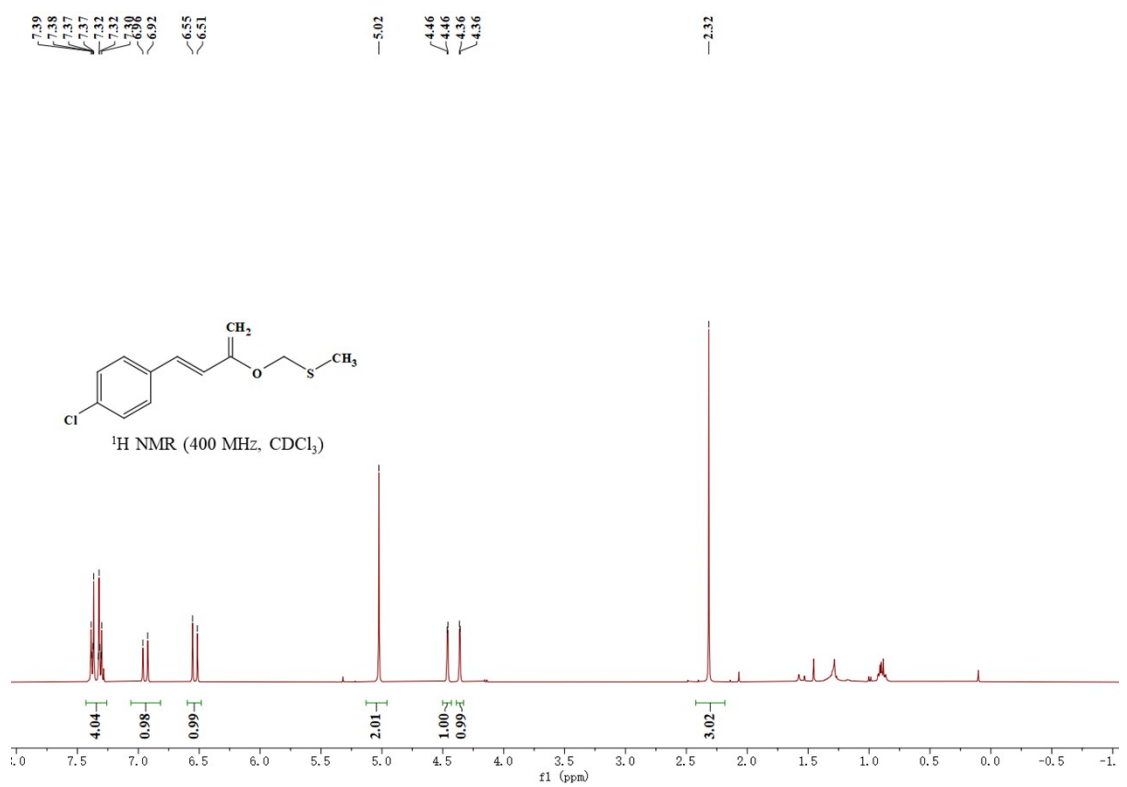



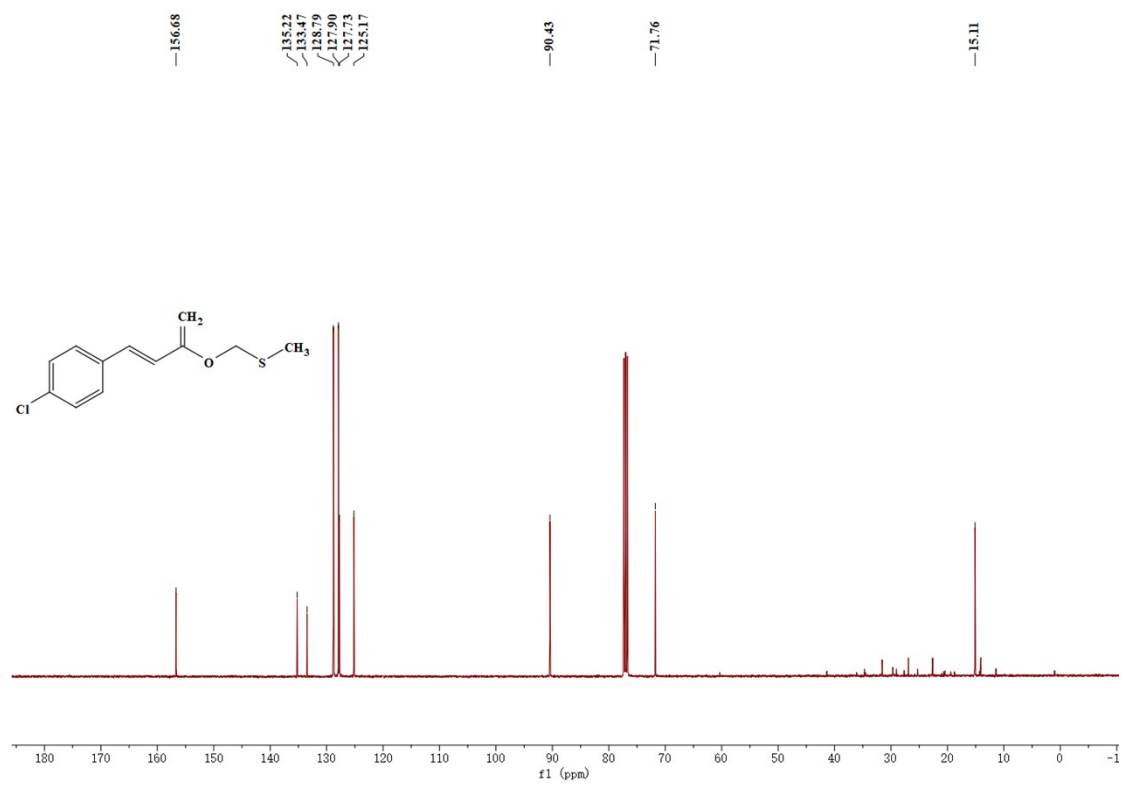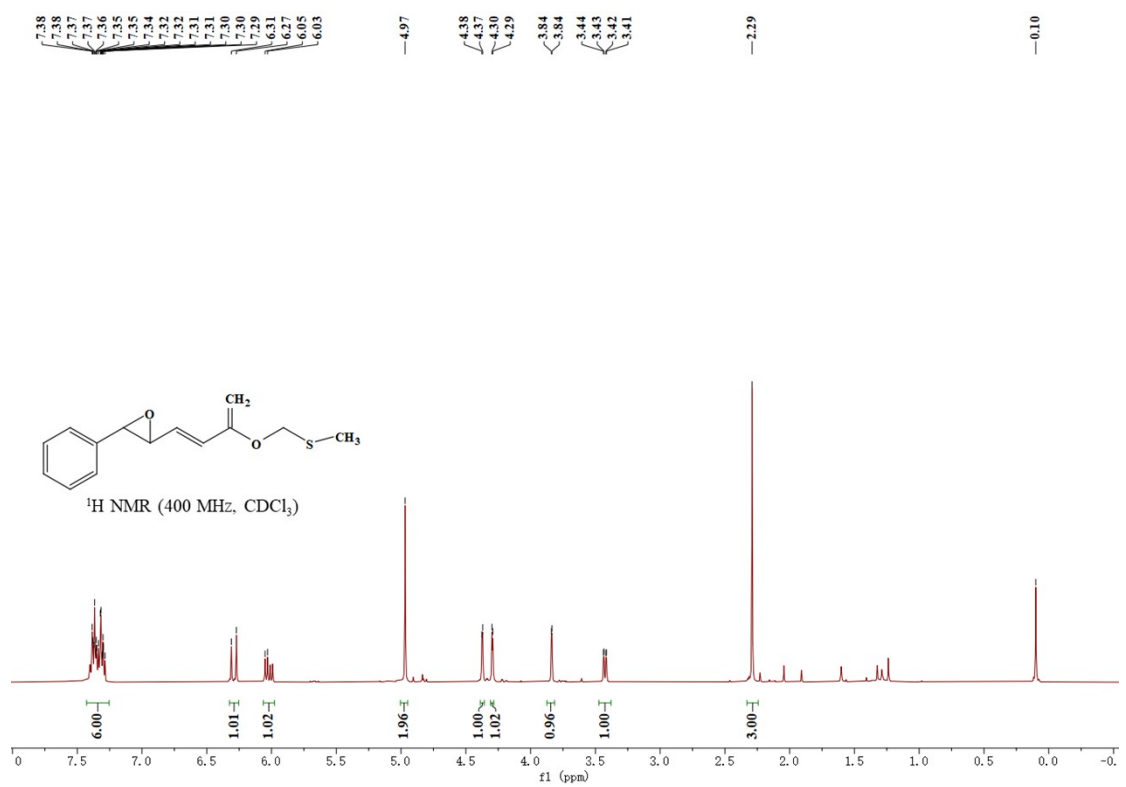

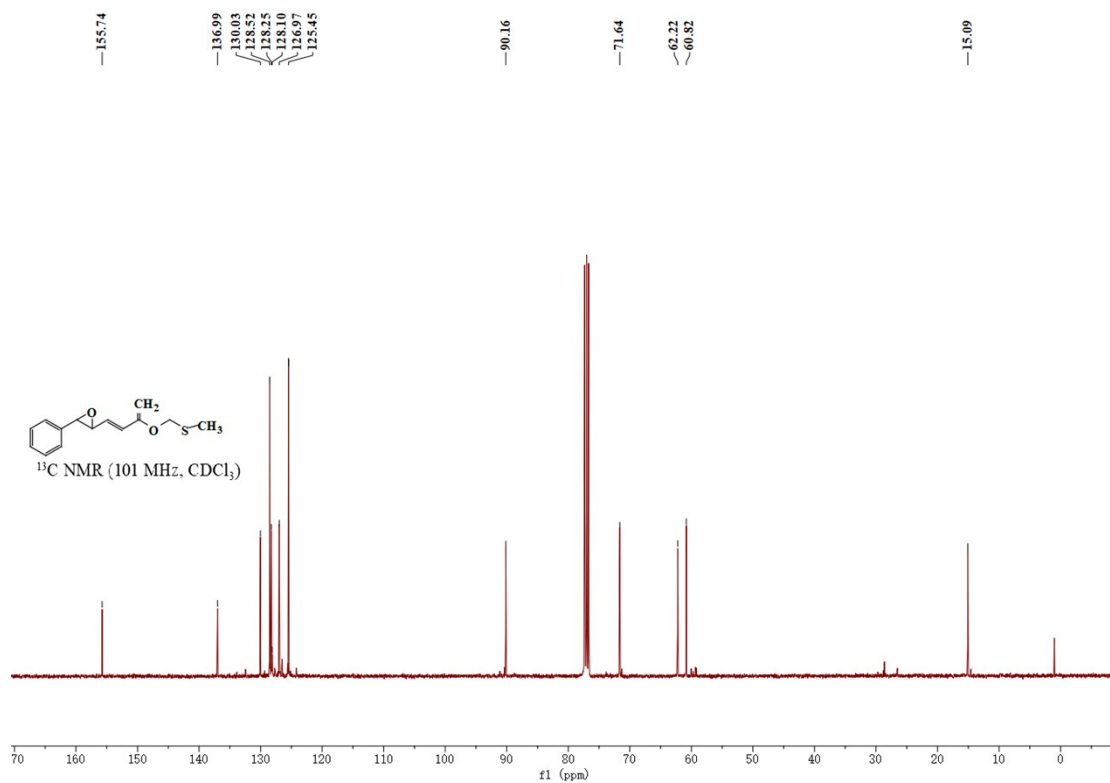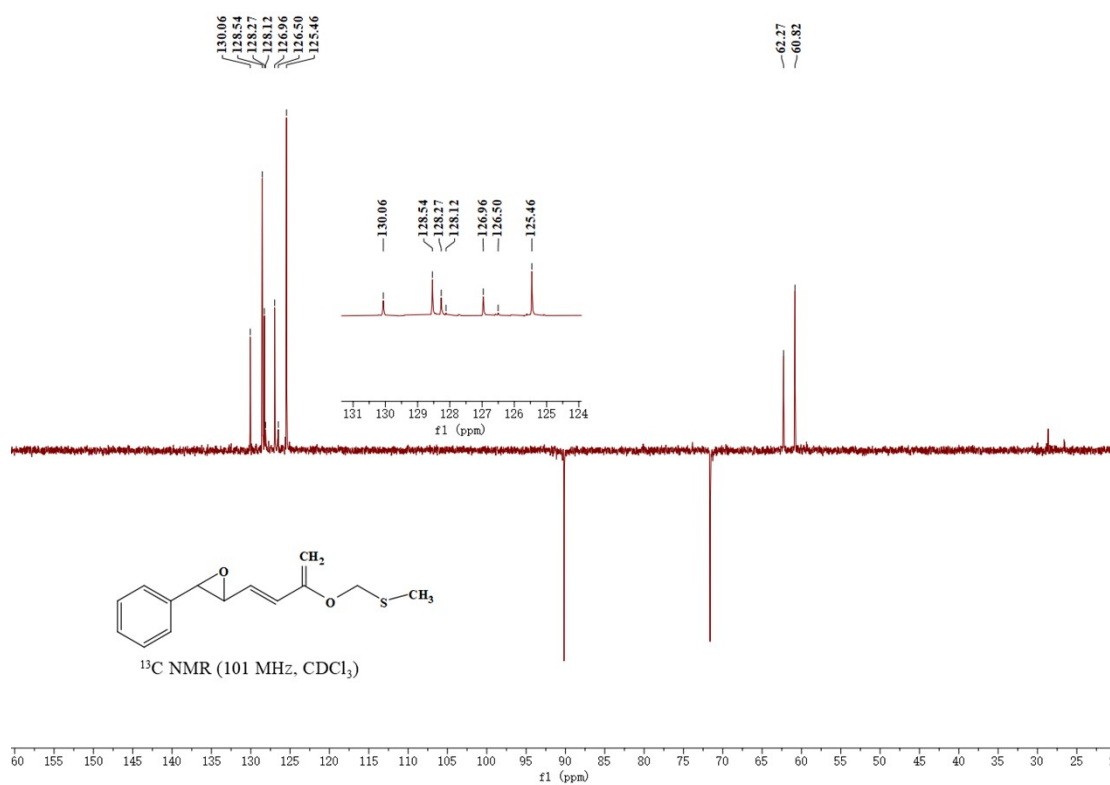

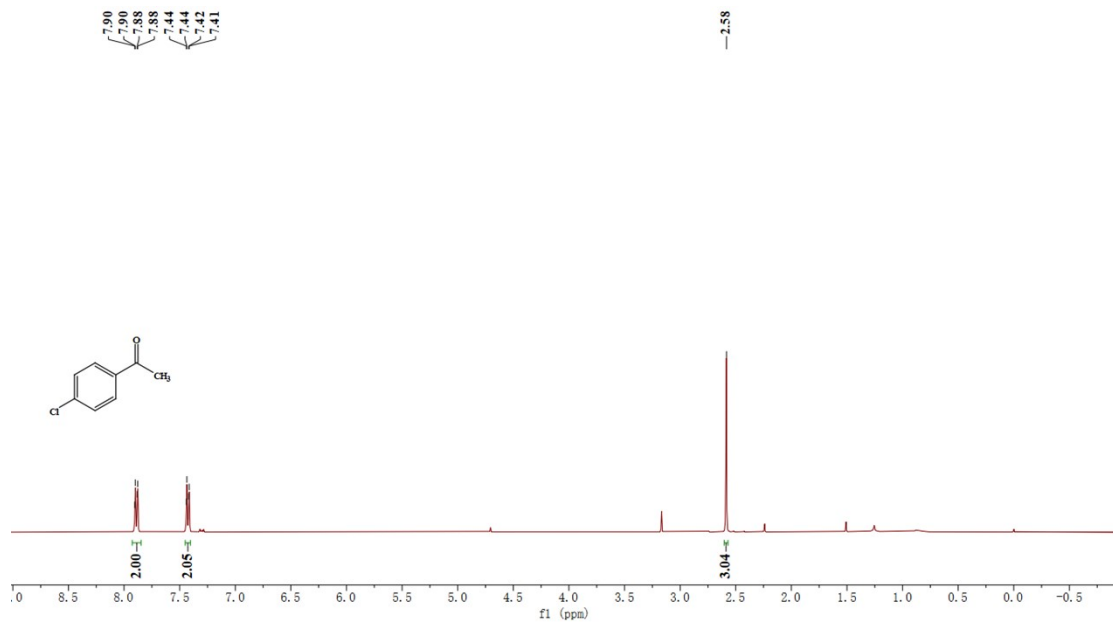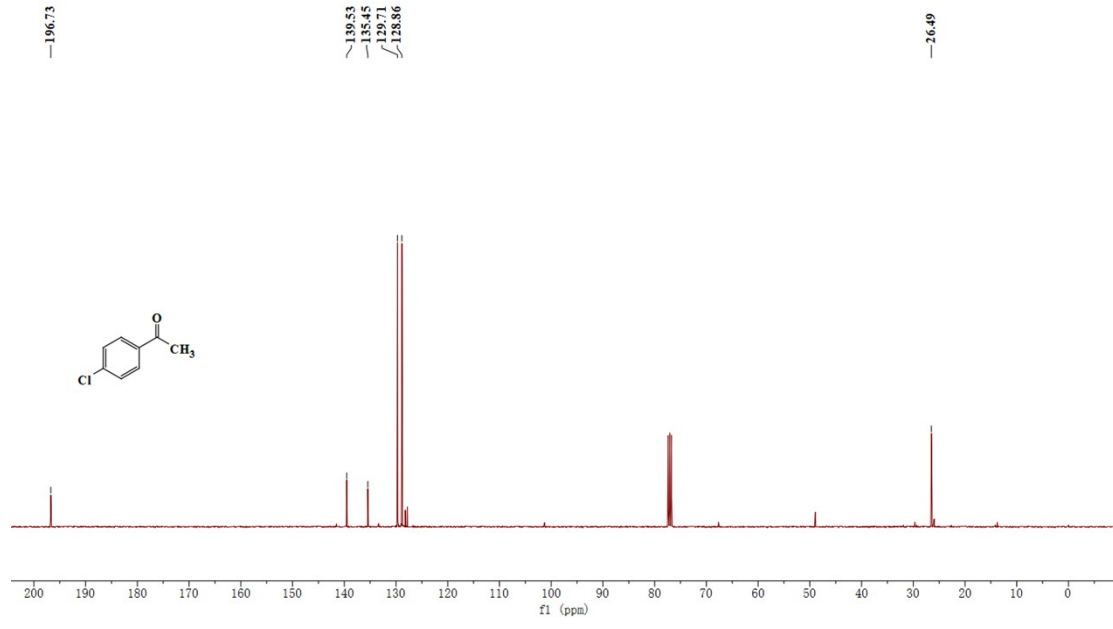

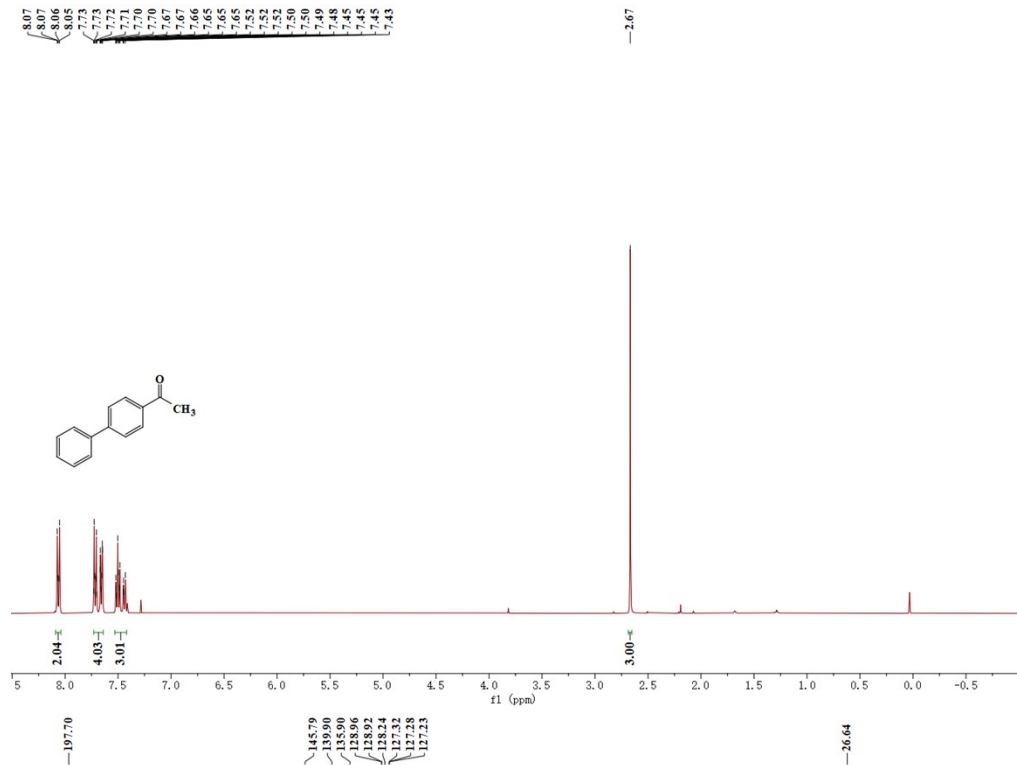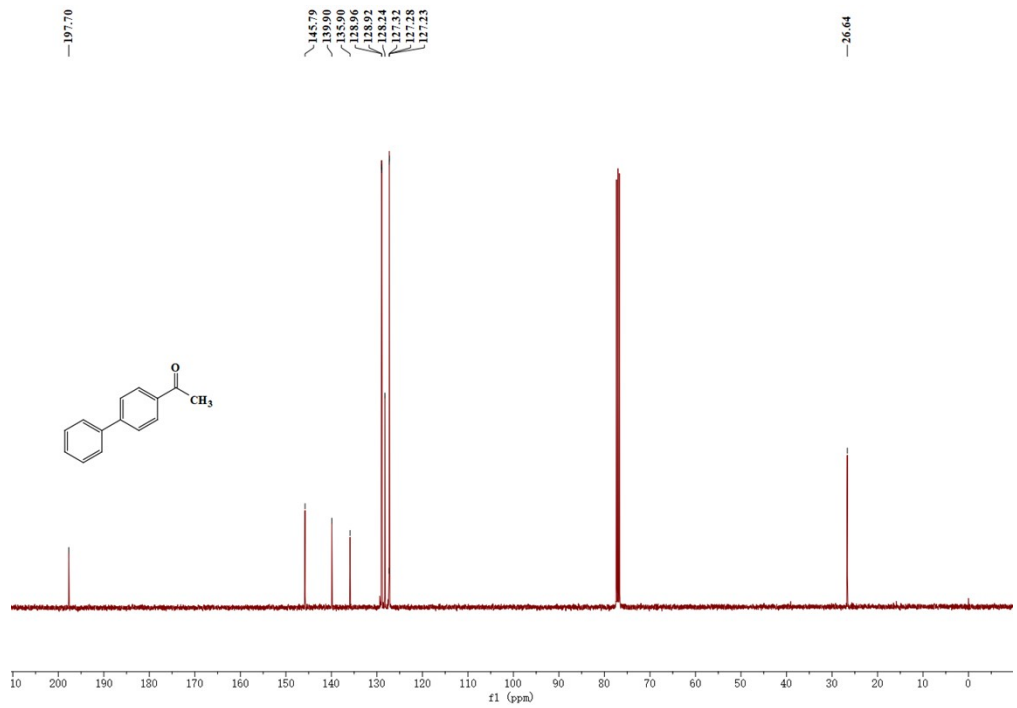

## 6 Density Functional Theory Calculations

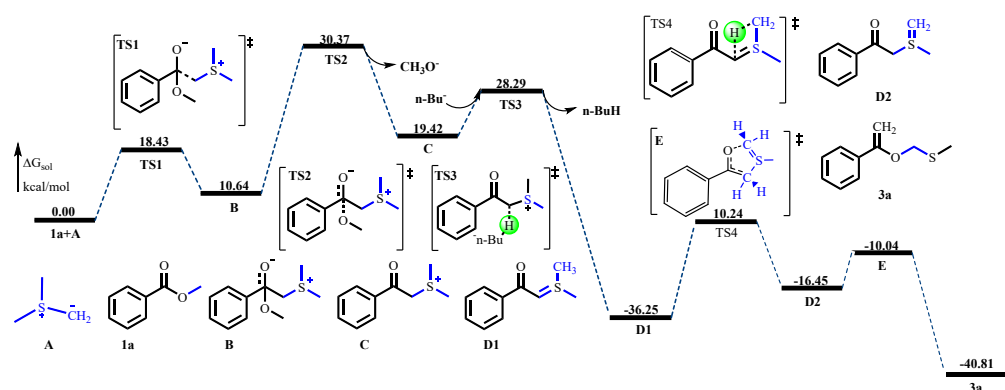

**Figure 1.** DFT calculations of free energy surfaces before conversion of R1+R2 into intermediates of PC at the M062X(D3)/6-31G (d) level using the SMD solvation model and THF as the solvent.

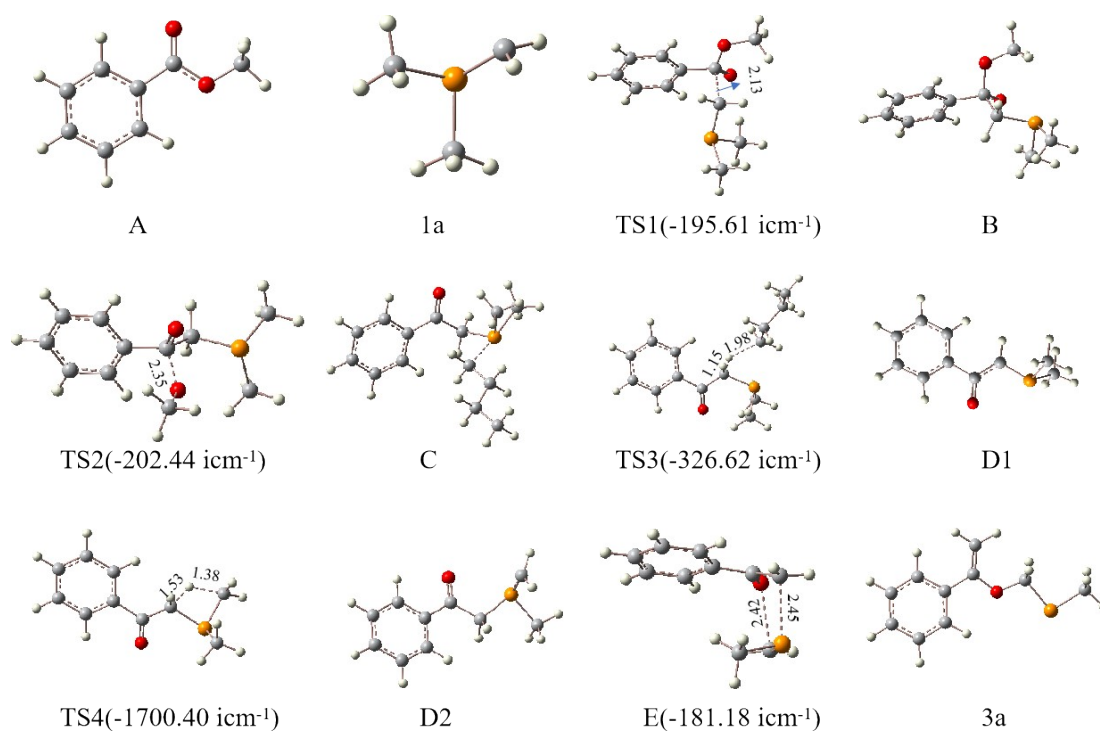

**Figure 2.** Transition state structures of PCs generated at the M062X(D3)/6-31G (d) level (distances in Å) starting from R1 and R2 transitions using the SMD solvation model and THF as the solvent (distances in Å). The parameter in parentheses is the unique imaginary frequency of the transition state.

To investigate this interesting reaction, we performed density functional theory (DFT) calculations to gain more mechanistic insights (Figure 2). The results showed that the formation of the transition state TS3 was the rate-determining step due to the high energy barrier. Under normal conditions, elevating the temperature proved to be advantageous for the advancement of the reaction, aligning with our experimental findings. In addition, an excess of n-BuLi was important for the reaction to proceed properly. The crucial factor in the generation of the product was the proton transfer of the transition

state TS4, which was an extremely energetic step. Followed by the rearrangement of the intermediate E to produced the final product 3a. Transition state structures of PCs generated at the M062X(D3)/6-31G (d) level (distances in Å) starting from R1 and R2 transitions using the SMD solvation model and THF as the solvent (distances in Å). The parameter in parentheses is the unique imaginary frequency of the transition state (Figure 2).

**Table 2 The gibbs energies of all optimized stationary points in solvent<sup>a</sup>**

| Structure | Gsol/Def2svp | Gsol/Def2TZVP | $\Delta G_{sol}$ | $\Delta G_{sol}$ (kcal/mol) =<br>$\Delta G_{sol}(\text{Hartree}) * 627.51$ |
|-----------|--------------|---------------|------------------|----------------------------------------------------------------------------|
| A         | 0.072079     | -517.0244251  | -516.95          |                                                                            |
| 3a        | 0.110242     | -459.7971632  | -459.69          |                                                                            |
| TS1       | 0.203662     | -976.8135583  | -976.61          | 0.0293710420                                                               |
| B         | 0.206262     | -976.8285743  | -976.62          | 0.0169550450                                                               |
| TS2       | 0.207964     | -984.2661003  | -984.06          | 0.0483978490                                                               |
| C         | 0.277231     | -1019.437811  | -1019.16         | 0.0309475950                                                               |
| TS3       | 0.274422     | -1019.42086   | -1019.15         | 0.0450898850                                                               |
| D1        | 0.156201     | -861.1920769  | -861.04          | -0.0577682630                                                              |
| TS4       | 0.149069     | -861.1108616  | -860.96          | 0.0163151030                                                               |
| D3        | 0.155815     | -861.1950091  | -861.04          | -0.0610863880                                                              |
| D2        | 0.153654     | -861.1579802  | -861.00          | -0.0262184870                                                              |
| E         | 0.154291     | -861.1483922  | -860.99          | -0.0159935320                                                              |
| 3a        | 0.155343     | -861.1984918  | -861.04          | -0.0650411150                                                              |
| C4H9      | 0.087431     | -157.7245343  | -157.64          |                                                                            |

<sup>a</sup>Gibbs free energy conversion of R1 and R3 to PC1 at the M06-2X(D3)/6-31G (d) level using the SMD solvation model and DMF as solvent

## 7 Cartesian Coordinates Calculated by DFT

**Table 2. Standard orientation, imaginary frequencies, thermodynamic energies and single-point energies of All Stationary Points**

**1a**

---

| Center<br>Number | Atomic<br>Number | Atomic<br>Type | Coordinates (Angstroms) |           |           |
|------------------|------------------|----------------|-------------------------|-----------|-----------|
|                  |                  |                | X                       | Y         | Z         |
| 1                | 6                | 0              | -2.473793               | -1.016594 | 0.000031  |
| 2                | 6                | 0              | -1.097212               | -1.219045 | 0.000064  |
| 3                | 6                | 0              | -0.226291               | -0.123314 | 0.000013  |
| 4                | 6                | 0              | -0.743329               | 1.177976  | -0.000066 |
| 5                | 6                | 0              | -2.121580               | 1.376854  | -0.000015 |
| 6                | 6                | 0              | -2.986815               | 0.281784  | 0.000005  |
| 7                | 1                | 0              | -3.151303               | -1.873981 | 0.000019  |
| 8                | 1                | 0              | -0.675166               | -2.226248 | 0.000201  |
| 9                | 1                | 0              | -0.060793               | 2.029207  | -0.000138 |
| 10               | 1                | 0              | -2.524060               | 2.392796  | 0.000030  |
| 11               | 1                | 0              | -4.068190               | 0.441516  | -0.000010 |
| 12               | 6                | 0              | 1.236788                | -0.393597 | -0.000036 |
| 13               | 8                | 0              | 1.724141                | -1.499486 | -0.000114 |
| 14               | 8                | 0              | 1.963726                | 0.724070  | 0.000025  |
| 15               | 6                | 0              | 3.372985                | 0.558144  | 0.000069  |
| 16               | 1                | 0              | 3.704874                | 0.009946  | -0.894358 |
| 17               | 1                | 0              | 3.802382                | 1.567164  | 0.000233  |
| 18               | 1                | 0              | 3.704798                | 0.009672  | 0.894350  |

---

Freq calculation at PBE0-D3BJ/def2svp-smd(tetrahydrofuran) level

0 imaginary frequencies

Zero-point Energies= -459.151901

Thermal Energies= -459.143156

Thermal Enthalpies= -459.142211

Thermal Free Energies= -459.186295

**3a**

---

| Center<br>Number | Atomic<br>Number | Atomic<br>Type | Coordinates (Angstroms) |           |           |
|------------------|------------------|----------------|-------------------------|-----------|-----------|
|                  |                  |                | X                       | Y         | Z         |
| 1                | 6                | 0              | 2.870345                | 1.712514  | 0.221767  |
| 2                | 6                | 0              | 1.631410                | 1.075680  | 0.245703  |
| 3                | 6                | 0              | 1.534639                | -0.306263 | 0.026495  |
| 4                | 6                | 0              | 2.707456                | -1.030225 | -0.235814 |
| 5                | 6                | 0              | 3.943709                | -0.391624 | -0.258090 |
| 6                | 6                | 0              | 4.031482                | 0.982326  | -0.027528 |
| 7                | 1                | 0              | 2.927283                | 2.789463  | 0.399983  |
| 8                | 1                | 0              | 0.723142                | 1.647849  | 0.440668  |

|    |    |   |           |           |           |
|----|----|---|-----------|-----------|-----------|
| 9  | 1  | 0 | 2.653128  | -2.100898 | -0.444000 |
| 10 | 1  | 0 | 4.846405  | -0.970855 | -0.468540 |
| 11 | 1  | 0 | 5.002988  | 1.482579  | -0.049308 |
| 12 | 6  | 0 | 0.210883  | -0.968796 | 0.073467  |
| 13 | 8  | 0 | -0.788859 | -0.073049 | -0.101648 |
| 14 | 16 | 0 | -3.150891 | 0.953694  | -0.160486 |
| 15 | 6  | 0 | -4.746016 | 0.134922  | 0.034404  |
| 16 | 1  | 0 | -4.914444 | -0.615638 | -0.753432 |
| 17 | 1  | 0 | -4.840871 | -0.338580 | 1.023901  |
| 18 | 1  | 0 | -5.516813 | 0.913704  | -0.055220 |
| 19 | 6  | 0 | -2.106806 | -0.519167 | 0.017535  |
| 20 | 1  | 0 | -2.353361 | -1.253664 | -0.771649 |
| 21 | 1  | 0 | -2.279811 | -0.990057 | 1.003186  |
| 22 | 6  | 0 | 0.019084  | -2.283272 | 0.284512  |
| 23 | 1  | 0 | 0.872703  | -2.937955 | 0.457811  |
| 24 | 1  | 0 | -0.972335 | -2.737225 | 0.302850  |

-----  
Freq calculation at PBE0-D3BJ/def2svp- smd(tetrahydrofuran) level

0 imaginary frequencies

Zero-point Energies= -860.365857  
Thermal Energies= -860.353578  
Thermal Enthalpies= -860.352634  
Thermal Free Energies= -860.406606

**A**

| Center<br>Number | Atomic<br>Number | Atomic<br>Type | Coordinates (Angstroms) |           |           |
|------------------|------------------|----------------|-------------------------|-----------|-----------|
|                  |                  |                | X                       | Y         | Z         |
| 1                | 16               | 0              | -0.152981               | 0.047489  | -0.448869 |
| 2                | 6                | 0              | -1.636414               | 0.269628  | 0.297887  |
| 3                | 1                | 0              | -1.613315               | 0.434377  | 1.384062  |
| 4                | 1                | 0              | -2.267460               | 0.953834  | -0.280432 |
| 5                | 6                | 0              | 0.494849                | -1.510962 | 0.185968  |
| 6                | 1                | 0              | -0.181798               | -2.300782 | -0.165478 |
| 7                | 1                | 0              | 1.510464                | -1.674421 | -0.202335 |
| 8                | 1                | 0              | 0.503127                | -1.485595 | 1.285794  |
| 9                | 6                | 0              | 1.178246                | 1.121888  | 0.210022  |
| 10               | 1                | 0              | 1.238414                | 1.007005  | 1.302773  |
| 11               | 1                | 0              | 2.140571                | 0.869242  | -0.260702 |
| 12               | 1                | 0              | 0.897607                | 2.153200  | -0.045049 |

-----  
Freq calculation at PBE0-D3BJ/def2svp- smd(tetrahydrofuran) level

0 imaginary frequencies



Zero-point Energies= -516.642822  
 Thermal Energies= -516.636476  
 Thermal Enthalpies= -516.635531  
 Thermal Free Energies= -516.671562

**B**

| Center<br>Number | Atomic<br>Number | Atomic<br>Type | Coordinates (Angstroms) |           |           |
|------------------|------------------|----------------|-------------------------|-----------|-----------|
|                  |                  |                | X                       | Y         | Z         |
| 1                | 6                | 0              | -3.340441               | -1.264283 | -0.672537 |
| 2                | 6                | 0              | -2.030791               | -0.841329 | -0.903842 |
| 3                | 6                | 0              | -1.436096               | 0.113952  | -0.080958 |
| 4                | 6                | 0              | -2.171985               | 0.650435  | 0.981389  |
| 5                | 6                | 0              | -3.479744               | 0.227993  | 1.218937  |
| 6                | 6                | 0              | -4.067914               | -0.732592 | 0.392748  |
| 7                | 1                | 0              | -3.798707               | -2.010094 | -1.328636 |
| 8                | 1                | 0              | -1.432905               | -1.224775 | -1.734487 |
| 9                | 1                | 0              | -1.717720               | 1.415702  | 1.615715  |
| 10               | 1                | 0              | -4.048132               | 0.654483  | 2.050494  |
| 11               | 1                | 0              | -5.094086               | -1.061859 | 0.577797  |
| 12               | 6                | 0              | 0.018114                | 0.520602  | -0.363014 |
| 13               | 8                | 0              | 0.531191                | 0.057216  | -1.473945 |
| 14               | 8                | 0              | -0.034936               | 1.979598  | -0.264466 |
| 15               | 6                | 0              | 1.111967                | 2.626484  | -0.708525 |
| 16               | 1                | 0              | 1.468544                | 2.204506  | -1.664211 |
| 17               | 1                | 0              | 0.871173                | 3.691908  | -0.855718 |
| 18               | 1                | 0              | 1.952272                | 2.580791  | 0.019795  |
| 19               | 16               | 0              | 2.483951                | -0.334620 | -0.005133 |
| 20               | 6                | 0              | 0.910525                | 0.004983  | 0.821121  |
| 21               | 1                | 0              | 0.553618                | -0.948439 | 1.237961  |
| 22               | 1                | 0              | 1.103960                | 0.710992  | 1.644186  |
| 23               | 6                | 0              | 2.325370                | -2.027580 | -0.570707 |
| 24               | 1                | 0              | 1.560255                | -1.990762 | -1.353760 |
| 25               | 1                | 0              | 3.300310                | -2.336226 | -0.973684 |
| 26               | 1                | 0              | 2.026162                | -2.675021 | 0.265321  |
| 27               | 6                | 0              | 3.538124                | -0.611497 | 1.441097  |
| 28               | 1                | 0              | 3.088581                | -1.335282 | 2.135097  |
| 29               | 1                | 0              | 4.509854                | -0.977884 | 1.081416  |
| 30               | 1                | 0              | 3.680791                | 0.358369  | 1.937890  |

Freq calculation at PBE0-D3BJ/def2svp- smd(tetrahydrofuran) level

0 imaginary frequencies

Zero-point Energies= -975.805661

Thermal Energies= -975.790421  
 Thermal Enthalpies= -975.789477  
 Thermal Free Energies= -975.848418

**C**

| -----  |        |        |                         |           |           |
|--------|--------|--------|-------------------------|-----------|-----------|
| Center | Atomic | Atomic | Coordinates (Angstroms) |           |           |
| Number | Number | Type   | X                       | Y         | Z         |
| -----  |        |        |                         |           |           |
| 1      | 6      | 0      | 4.026834                | 0.860593  | 0.988008  |
| 2      | 6      | 0      | 3.017495                | -0.090896 | 1.060755  |
| 3      | 6      | 0      | 2.125723                | -0.271147 | -0.008408 |
| 4      | 6      | 0      | 2.270669                | 0.520738  | -1.156173 |
| 5      | 6      | 0      | 3.285755                | 1.472221  | -1.229893 |
| 6      | 6      | 0      | 4.162900                | 1.644876  | -0.160087 |
| 7      | 1      | 0      | 4.713300                | 0.994307  | 1.827682  |
| 8      | 1      | 0      | 2.895080                | -0.715836 | 1.947628  |
| 9      | 1      | 0      | 1.595369                | 0.405180  | -2.005167 |
| 10     | 1      | 0      | 3.390187                | 2.083743  | -2.129231 |
| 11     | 1      | 0      | 4.956686                | 2.393982  | -0.220081 |
| 12     | 6      | 0      | 1.073000                | -1.316574 | 0.149665  |
| 13     | 8      | 0      | 1.036582                | -2.007991 | 1.150443  |
| 14     | 16     | 0      | -1.676855               | -1.320315 | -0.436066 |
| 15     | 6      | 0      | 0.066561                | -1.557756 | -0.953589 |
| 16     | 1      | 0      | 0.178158                | -2.599830 | -1.280776 |
| 17     | 1      | 0      | 0.187102                | -0.894482 | -1.816035 |
| 18     | 6      | 0      | -1.983507               | -1.589672 | 1.324557  |
| 19     | 1      | 0      | -1.091084               | -2.055537 | 1.762481  |
| 20     | 1      | 0      | -2.185893               | -0.631684 | 1.816390  |
| 21     | 1      | 0      | -2.839203               | -2.271545 | 1.408998  |
| 22     | 6      | 0      | -2.015845               | -3.323700 | -0.720031 |
| 23     | 1      | 0      | -1.419829               | -4.007192 | -0.090524 |
| 24     | 1      | 0      | -3.089650               | -3.494542 | -0.533459 |
| 25     | 1      | 0      | -1.811776               | -3.532208 | -1.784078 |
| 26     | 6      | 0      | -3.759261               | 3.623056  | 0.231140  |
| 27     | 1      | 0      | -3.640270               | 4.714857  | 0.318214  |
| 28     | 1      | 0      | -4.342435               | 3.283052  | 1.103234  |
| 29     | 1      | 0      | -4.368830               | 3.426614  | -0.666654 |
| 30     | 6      | 0      | -2.417246               | 2.913157  | 0.153321  |
| 31     | 1      | 0      | -1.841068               | 3.299872  | -0.706419 |
| 32     | 1      | 0      | -1.816062               | 3.155133  | 1.048054  |
| 33     | 6      | 0      | -2.536339               | 1.396493  | 0.029192  |
| 34     | 1      | 0      | -3.146130               | 1.157900  | -0.864098 |
| 35     | 1      | 0      | -3.127181               | 1.023167  | 0.888104  |

|    |   |   |           |          |           |
|----|---|---|-----------|----------|-----------|
| 36 | 6 | 0 | -1.219935 | 0.656508 | -0.065116 |
| 37 | 1 | 0 | -0.590788 | 0.815024 | 0.830053  |
| 38 | 1 | 0 | -0.649472 | 1.011613 | -0.940839 |

-----  
 Freq calculation at PBE0-D3BJ/def2svp- smd(tetrahydrofuran) level

0 imaginary frequencies

Zero-point Energies= -1018.302142

Thermal Energies= -1018.283176

Thermal Enthalpies= -1018.282232

Thermal Free Energies= -1018.352216

**D1**

-----

| Center<br>Number | Atomic<br>Number | Atomic<br>Type | Coordinates (Angstroms) |           |           |
|------------------|------------------|----------------|-------------------------|-----------|-----------|
|                  |                  |                | X                       | Y         | Z         |
| 1                | 6                | 0              | 3.758797                | 0.754906  | -0.000004 |
| 2                | 6                | 0              | 2.416415                | 1.124709  | -0.000008 |
| 3                | 6                | 0              | 1.400946                | 0.160603  | -0.000002 |
| 4                | 6                | 0              | 1.765216                | -1.192772 | 0.000010  |
| 5                | 6                | 0              | 3.108226                | -1.567110 | 0.000015  |
| 6                | 6                | 0              | 4.109869                | -0.595662 | 0.000008  |
| 7                | 1                | 0              | 4.536990                | 1.523142  | -0.000009 |
| 8                | 1                | 0              | 2.110405                | 2.173160  | -0.000017 |
| 9                | 1                | 0              | 1.003004                | -1.974281 | 0.000016  |
| 10               | 1                | 0              | 3.374497                | -2.627495 | 0.000024  |
| 11               | 1                | 0              | 5.162229                | -0.891868 | 0.000012  |
| 12               | 6                | 0              | -0.026791               | 0.672966  | -0.000008 |
| 13               | 8                | 0              | -0.207002               | 1.898517  | -0.000025 |
| 14               | 16               | 0              | -2.659321               | 0.272046  | -0.000012 |
| 15               | 6                | 0              | -1.058439               | -0.299512 | 0.000013  |
| 16               | 1                | 0              | -3.051278               | -0.150032 | -2.294063 |
| 17               | 1                | 0              | -0.913975               | -1.380062 | 0.000042  |
| 18               | 6                | 0              | -3.498243               | -0.545927 | 1.372401  |
| 19               | 1                | 0              | -3.051305               | -0.149890 | 2.294062  |
| 20               | 1                | 0              | -4.568733               | -0.297250 | 1.335505  |
| 21               | 1                | 0              | -3.347291               | -1.633017 | 1.310353  |
| 22               | 6                | 0              | -3.498229               | -0.546010 | -1.372383 |
| 23               | 1                | 0              | -3.347281               | -1.633097 | -1.310264 |
| 24               | 1                | 0              | -4.568719               | -0.297327 | -1.335515 |

-----

Freq calculation at PBE0-D3BJ/def2svp- smd(tetrahydrofuran) level

1 imaginary frequencies (-535.95)

Zero-point Energies= -860.353261

Thermal Energies= -860.341700

Thermal Enthalpies= -860.340756

Thermal Free Energies= -860.391578

**D2**

---

| Center<br>Number | Atomic<br>Number | Atomic<br>Type | Coordinates (Angstroms) |           |           |
|------------------|------------------|----------------|-------------------------|-----------|-----------|
|                  |                  |                | X                       | Y         | Z         |
| 1                | 6                | 0              | 3.704107                | -0.819660 | -0.000597 |
| 2                | 6                | 0              | 2.362489                | -1.145234 | -0.160539 |
| 3                | 6                | 0              | 1.377645                | -0.148610 | -0.103645 |
| 4                | 6                | 0              | 1.760700                | 1.182698  | 0.110182  |
| 5                | 6                | 0              | 3.106177                | 1.508157  | 0.266952  |
| 6                | 6                | 0              | 4.077864                | 0.509112  | 0.213638  |
| 7                | 1                | 0              | 4.465105                | -1.602835 | -0.042837 |
| 8                | 1                | 0              | 2.048172                | -2.177044 | -0.331311 |
| 9                | 1                | 0              | 1.012997                | 1.977125  | 0.153268  |
| 10               | 1                | 0              | 3.397499                | 2.548154  | 0.432598  |
| 11               | 1                | 0              | 5.132696                | 0.766661  | 0.339419  |
| 12               | 6                | 0              | -0.043947               | -0.563119 | -0.294427 |
| 13               | 8                | 0              | -0.335349               | -1.713543 | -0.539362 |
| 14               | 16               | 0              | -2.775337               | -0.215218 | -0.135079 |
| 15               | 6                | 0              | -1.105341               | 0.513000  | -0.204929 |
| 16               | 1                | 0              | -1.036418               | 1.164796  | -1.092214 |
| 17               | 1                | 0              | -0.977675               | 1.141328  | 0.689832  |
| 18               | 6                | 0              | -3.659789               | 1.338902  | -0.525258 |
| 19               | 1                | 0              | -3.417102               | 1.673379  | -1.545385 |
| 20               | 1                | 0              | -4.729610               | 1.099154  | -0.453334 |
| 21               | 1                | 0              | -3.400732               | 2.115743  | 0.209304  |
| 22               | 6                | 0              | -3.021507               | -0.712076 | 1.432266  |
| 23               | 1                | 0              | -3.082331               | 0.052171  | 2.215825  |
| 24               | 1                | 0              | -3.674805               | -1.585816 | 1.499142  |

---

Freq calculation at PBE0-D3BJ/def2svp- smd(tetrahydrofuran) level

0 imaginary frequencies

Zero-point Energies= -860.314585

Thermal Energies= -860.301973

Thermal Enthalpies= -860.301029

Thermal Free Energies= -860.354333

**TS1**

---

| Center<br>Number | Atomic<br>Number | Atomic<br>Type | Coordinates (Angstroms) |   |   |
|------------------|------------------|----------------|-------------------------|---|---|
|                  |                  |                | X                       | Y | Z |

|    |    |   |           |           |           |
|----|----|---|-----------|-----------|-----------|
| 1  | 6  | 0 | 2.517881  | -1.607088 | 1.031297  |
| 2  | 6  | 0 | 1.493839  | -0.670610 | 1.165492  |
| 3  | 6  | 0 | 1.272306  | 0.287473  | 0.172634  |
| 4  | 6  | 0 | 2.106886  | 0.310593  | -0.950609 |
| 5  | 6  | 0 | 3.134352  | -0.621569 | -1.083034 |
| 6  | 6  | 0 | 3.340963  | -1.586867 | -0.095004 |
| 7  | 1  | 0 | 2.679969  | -2.353247 | 1.814124  |
| 8  | 1  | 0 | 0.850300  | -0.658642 | 2.048243  |
| 9  | 1  | 0 | 1.941744  | 1.067720  | -1.719576 |
| 10 | 1  | 0 | 3.782425  | -0.594074 | -1.963477 |
| 11 | 1  | 0 | 4.146359  | -2.318456 | -0.201592 |
| 12 | 6  | 0 | 0.132790  | 1.259629  | 0.365498  |
| 13 | 8  | 0 | -0.398949 | 1.401813  | 1.473805  |
| 14 | 8  | 0 | 0.300082  | 2.345155  | -0.467922 |
| 15 | 6  | 0 | -0.595939 | 3.400537  | -0.251726 |
| 16 | 1  | 0 | -0.545664 | 3.774115  | 0.783357  |
| 17 | 1  | 0 | -0.319566 | 4.204802  | -0.947923 |
| 18 | 1  | 0 | -1.639788 | 3.098090  | -0.452347 |
| 19 | 16 | 0 | -1.738138 | -1.227138 | -0.182999 |
| 20 | 6  | 0 | -1.214568 | 0.237783  | -0.931252 |
| 21 | 1  | 0 | -0.612159 | -0.013643 | -1.812802 |
| 22 | 1  | 0 | -2.059167 | 0.905883  | -1.157906 |
| 23 | 6  | 0 | -3.124249 | -1.965355 | -1.088853 |
| 24 | 1  | 0 | -2.727863 | -2.323775 | -2.049023 |
| 25 | 1  | 0 | -3.514810 | -2.814231 | -0.507167 |
| 26 | 1  | 0 | -3.904702 | -1.208434 | -1.252368 |
| 27 | 6  | 0 | -2.600903 | -0.637623 | 1.274050  |
| 28 | 1  | 0 | -3.511039 | -0.100335 | 0.970757  |
| 29 | 1  | 0 | -2.847750 | -1.499779 | 1.907954  |
| 30 | 1  | 0 | -1.897297 | 0.051052  | 1.769693  |

Freq calculation at PBE0-D3BJ/def2svp- smd(tetrahydrofuran) level

1 imaginary frequencies (-195.61 icm-1)

Zero-point Energies= -975.792721

Thermal Energies= -975.777402

Thermal Enthalpies= -975.776458

Thermal Free Energies= -975.835968

## TS2

| Center<br>Number | Atomic<br>Number | Atomic<br>Type | Coordinates (Angstroms) |   |   |
|------------------|------------------|----------------|-------------------------|---|---|
|                  |                  |                | X                       | Y | Z |

|    |    |   |           |           |           |
|----|----|---|-----------|-----------|-----------|
| 1  | 6  | 0 | 3.653299  | -0.956544 | 0.619785  |
| 2  | 6  | 0 | 2.326686  | -0.730544 | 0.988371  |
| 3  | 6  | 0 | 1.438452  | -0.105230 | 0.112555  |
| 4  | 6  | 0 | 1.901150  | 0.304459  | -1.142912 |
| 5  | 6  | 0 | 3.226432  | 0.082711  | -1.517101 |
| 6  | 6  | 0 | 4.105985  | -0.552530 | -0.637103 |
| 7  | 1  | 0 | 4.340702  | -1.445812 | 1.316195  |
| 8  | 1  | 0 | 1.933649  | -1.013103 | 1.968653  |
| 9  | 1  | 0 | 1.214592  | 0.820587  | -1.819109 |
| 10 | 1  | 0 | 3.580064  | 0.412932  | -2.498235 |
| 11 | 1  | 0 | 5.145396  | -0.725352 | -0.929645 |
| 12 | 6  | 0 | -0.020394 | 0.093309  | 0.582233  |
| 13 | 8  | 0 | -0.229463 | -0.040066 | 1.834141  |
| 14 | 8  | 0 | -0.458681 | 1.433190  | 0.011937  |
| 15 | 6  | 0 | -0.099172 | 2.512153  | 0.818598  |
| 16 | 1  | 0 | 0.700676  | 2.241520  | 1.528506  |
| 17 | 1  | 0 | 0.254367  | 3.347338  | 0.187604  |
| 18 | 1  | 0 | -0.949395 | 2.881095  | 1.424753  |
| 19 | 16 | 0 | -2.604540 | -0.240217 | 0.111974  |
| 20 | 6  | 0 | -0.942251 | -0.820754 | -0.285947 |
| 21 | 1  | 0 | -0.869053 | -1.854969 | 0.076239  |
| 22 | 1  | 0 | -0.816661 | -0.783183 | -1.378836 |
| 23 | 6  | 0 | -3.595801 | -1.730060 | -0.046037 |
| 24 | 1  | 0 | -3.343872 | -2.375165 | 0.807055  |
| 25 | 1  | 0 | -4.654237 | -1.440404 | 0.014980  |
| 26 | 1  | 0 | -3.385371 | -2.240884 | -0.995616 |
| 27 | 6  | 0 | -3.076619 | 0.638488  | -1.378477 |
| 28 | 1  | 0 | -2.358293 | 1.463823  | -1.459731 |
| 29 | 1  | 0 | -3.025889 | -0.026796 | -2.251096 |
| 30 | 1  | 0 | -4.095480 | 1.024094  | -1.235721 |

-----  
Freq calculation at PBE0-D3BJ/def2svp- smd(tetrahydrofuran) level

1 imaginary frequencies (-202.44 icm-1)

Zero-point Energies= -975.801259  
Thermal Energies= -975.786448  
Thermal Enthalpies= -975.785504  
Thermal Free Energies= -975.844100

**TS3**

-----

| Center<br>Number | Atomic<br>Number | Atomic<br>Type | Coordinates (Angstroms) |           |           |
|------------------|------------------|----------------|-------------------------|-----------|-----------|
|                  |                  |                | X                       | Y         | Z         |
| 1                | 6                | 0              | 4.693788                | -0.793386 | -0.070627 |

-----

|    |    |   |           |           |           |
|----|----|---|-----------|-----------|-----------|
| 2  | 6  | 0 | 3.693658  | 0.172369  | -0.083263 |
| 3  | 6  | 0 | 2.343211  | -0.199045 | -0.004225 |
| 4  | 6  | 0 | 2.012742  | -1.560596 | 0.075922  |
| 5  | 6  | 0 | 3.016181  | -2.526281 | 0.084036  |
| 6  | 6  | 0 | 4.356981  | -2.146131 | 0.013781  |
| 7  | 1  | 0 | 5.743072  | -0.492915 | -0.128361 |
| 8  | 1  | 0 | 3.934903  | 1.235138  | -0.153085 |
| 9  | 1  | 0 | 0.968762  | -1.877644 | 0.117774  |
| 10 | 1  | 0 | 2.749119  | -3.584359 | 0.141669  |
| 11 | 1  | 0 | 5.141963  | -2.906758 | 0.021578  |
| 12 | 6  | 0 | 1.322077  | 0.889094  | -0.019054 |
| 13 | 8  | 0 | 1.646849  | 2.047959  | -0.252813 |
| 14 | 16 | 0 | -1.389123 | 1.680304  | 0.289609  |
| 15 | 6  | 0 | -0.077808 | 0.459029  | 0.211211  |
| 16 | 1  | 0 | -0.202190 | -0.178645 | 1.098376  |
| 17 | 1  | 0 | -0.596526 | -0.094785 | -0.651813 |
| 18 | 6  | 0 | -1.168587 | 2.677485  | -1.190540 |
| 19 | 1  | 0 | -1.224691 | 1.988947  | -2.040520 |
| 20 | 1  | 0 | -2.013922 | 3.379476  | -1.219700 |
| 21 | 1  | 0 | -0.206509 | 3.199615  | -1.148336 |
| 22 | 6  | 0 | -0.706010 | 2.857286  | 1.513985  |
| 23 | 1  | 0 | 0.306127  | 3.181652  | 1.239730  |
| 24 | 1  | 0 | -1.399306 | 3.709336  | 1.558395  |
| 25 | 1  | 0 | -0.706899 | 2.341429  | 2.484908  |
| 26 | 6  | 0 | -4.664701 | -2.805466 | 0.792586  |
| 27 | 1  | 0 | -5.628944 | -3.308416 | 0.613422  |
| 28 | 1  | 0 | -4.757817 | -2.240646 | 1.735820  |
| 29 | 1  | 0 | -3.908667 | -3.591878 | 0.957579  |
| 30 | 6  | 0 | -4.271035 | -1.893818 | -0.359590 |
| 31 | 1  | 0 | -4.214448 | -2.478260 | -1.296019 |
| 32 | 1  | 0 | -5.063891 | -1.141827 | -0.526804 |
| 33 | 6  | 0 | -2.939410 | -1.164211 | -0.150508 |
| 34 | 1  | 0 | -2.161933 | -1.933404 | 0.037504  |
| 35 | 1  | 0 | -3.017449 | -0.608991 | 0.812042  |
| 36 | 6  | 0 | -2.479435 | -0.226679 | -1.243273 |
| 37 | 1  | 0 | -3.285060 | 0.479715  | -1.528025 |
| 38 | 1  | 0 | -2.194433 | -0.783225 | -2.160020 |

-----  
Freq calculation at PBE0-D3BJ/def2svp- smd(tetrahydrofuran) level

1 imaginary frequencies (-326.62 icm-1)

Zero-point Energies= -1018.291576

Thermal Energies= -1018.272653

Thermal Enthalpies= -1018.271709

Thermal Free Energies= -1018.340731

**TS4**

---

| Center<br>Number | Atomic<br>Number | Atomic<br>Type | Coordinates (Angstroms) |           |           |
|------------------|------------------|----------------|-------------------------|-----------|-----------|
|                  |                  |                | X                       | Y         | Z         |
| 1                | 6                | 0              | 3.724547                | 0.782472  | 0.029888  |
| 2                | 6                | 0              | 2.388356                | 1.155069  | -0.080126 |
| 3                | 6                | 0              | 1.373790                | 0.189984  | -0.046358 |
| 4                | 6                | 0              | 1.722666                | -1.160828 | 0.088549  |
| 5                | 6                | 0              | 3.060754                | -1.534662 | 0.194667  |
| 6                | 6                | 0              | 4.063624                | -0.564772 | 0.168320  |
| 7                | 1                | 0              | 4.507839                | 1.544616  | 0.006041  |
| 8                | 1                | 0              | 2.098599                | 2.201891  | -0.194755 |
| 9                | 1                | 0              | 0.948254                | -1.931025 | 0.095665  |
| 10               | 1                | 0              | 3.323030                | -2.591013 | 0.294323  |
| 11               | 1                | 0              | 5.112706                | -0.860228 | 0.252687  |
| 12               | 6                | 0              | -0.046321               | 0.664220  | -0.162449 |
| 13               | 8                | 0              | -0.284919               | 1.834366  | -0.440072 |
| 14               | 16               | 0              | -2.775730               | 0.230909  | -0.172568 |
| 15               | 6                | 0              | -1.087290               | -0.344945 | 0.000653  |
| 16               | 1                | 0              | -1.586356               | -1.092187 | -1.047191 |
| 17               | 1                | 0              | -0.985526               | -1.057499 | 0.830803  |
| 18               | 6                | 0              | -3.502539               | 0.083250  | 1.465970  |
| 19               | 1                | 0              | -3.086383               | 0.878662  | 2.100853  |
| 20               | 1                | 0              | -4.588033               | 0.222516  | 1.365495  |
| 21               | 1                | 0              | -3.279591               | -0.907406 | 1.886796  |
| 22               | 6                | 0              | -3.114421               | -1.215195 | -1.148991 |
| 23               | 1                | 0              | -3.350992               | -2.069290 | -0.491807 |
| 24               | 1                | 0              | -3.921512               | -1.036060 | -1.877978 |

---

Freq calculation at PBE0-D3BJ/def2svp- smd(tetrahydrofuran) level

1 imaginary frequencies (-1700.40 icm-1)

Zero-point Energies= -860.279561  
Thermal Energies= -860.267460  
Thermal Enthalpies= -860.266516  
Thermal Free Energies= -860.318955

**E**

---

| Center<br>Number | Atomic<br>Number | Atomic<br>Type | Coordinates (Angstroms) |          |          |
|------------------|------------------|----------------|-------------------------|----------|----------|
|                  |                  |                | X                       | Y        | Z        |
| 1                | 6                | 0              | 2.744196                | 0.926575 | 0.963793 |

---



|    |    |   |           |           |           |
|----|----|---|-----------|-----------|-----------|
| 2  | 6  | 0 | 1.498806  | 1.165892  | 0.387640  |
| 3  | 6  | 0 | 0.947934  | 0.266638  | -0.535788 |
| 4  | 6  | 0 | 1.688220  | -0.871890 | -0.885897 |
| 5  | 6  | 0 | 2.935707  | -1.111382 | -0.313447 |
| 6  | 6  | 0 | 3.466687  | -0.215940 | 0.616851  |
| 7  | 1  | 0 | 3.156784  | 1.636369  | 1.686046  |
| 8  | 1  | 0 | 0.919127  | 2.058153  | 0.634710  |
| 9  | 1  | 0 | 1.294431  | -1.575277 | -1.623109 |
| 10 | 1  | 0 | 3.501314  | -2.002412 | -0.598919 |
| 11 | 1  | 0 | 4.445598  | -0.405720 | 1.064920  |
| 12 | 6  | 0 | -0.411316 | 0.578090  | -1.095390 |
| 13 | 8  | 0 | -0.922176 | 1.695824  | -0.840291 |
| 14 | 16 | 0 | -2.591838 | -0.530478 | 0.322055  |
| 15 | 6  | 0 | -1.184430 | -0.445971 | -1.677721 |
| 16 | 1  | 0 | -0.781000 | -1.440489 | -1.886406 |
| 17 | 1  | 0 | -2.060046 | -0.143369 | -2.256883 |
| 18 | 6  | 0 | -1.417002 | -1.482513 | 1.296734  |
| 19 | 1  | 0 | -0.485991 | -0.916109 | 1.429040  |
| 20 | 1  | 0 | -1.872438 | -1.707380 | 2.271149  |
| 21 | 1  | 0 | -1.214440 | -2.414040 | 0.751827  |
| 22 | 6  | 0 | -2.459894 | 0.996530  | 0.893671  |
| 23 | 1  | 0 | -1.685587 | 1.283470  | 1.606757  |
| 24 | 1  | 0 | -3.224386 | 1.711681  | 0.587645  |

-----  
Freq calculation at PBE0-D3BJ/def2svp- smd(tetrahydrofuran) level

1 imaginary frequencies (-181.18 icm-1)

Zero-point Energies= -860.314811

Thermal Energies= -860.303056

Thermal Enthalpies= -860.302111

Thermal Free Energies= -860.353272

## REFERENCES

- (1) Paul Mosset & René Grée (1985) Trimethylsulfonium Methylsulfate, A Simple and Efficient Epoxidizing Agent, *Synthetic Communications*, 15:8, 749-757, DOI: 10.1080/00397918508063867
- (2) Nagaki, A., Takabayashi, N., Moriwaki, Y. and Yoshida, J.-i. (2012), Flash Generation of a Highly Reactive Pd Catalyst for Suzuki–Miyaura Coupling by Using a Flow Microreactor. *Chem. Eur. J.*, 18: 11871-11875. <https://doi.org/10.1002/chem.201201579>
- (3) Saravanselvi, C., Somasundaram, N., Vijaikumar, S. et al. Deoxygenation on irradiated TiO<sub>2</sub>: regeneration of ketones from ketoximes. *Photochem Photobiol Sci* 1, 607–608 (2002). <https://doi.org/10.1039/b203721c>
